# Supplementary material for: The “cesium effect” magnified: exceptional chemoselectivity in cesium ion mediated nucleophilic reactions
Source: Royal Society of Chemistry journal article supplement (doi:10.1039/d4sc00316k), 2024-01-01
Supplement: d4sc00316k1.pdf [file d4sc00316k1.pdf]

Supporting information

**The “Cesium Effect” Magnified: Exceptional Chemoselectivity in Cesium Ion Mediated Nucleophilic Reactions**

Soumen Biswas, William B. Hughes, Luca De Angelis, Graham C. Haug, Ramon Trevino, Seth O. Fremin, Hadi D. Arman, Oleg V. Larionov\*, and Michael P. Doyle\*

Department of Chemistry, The University of Texas at San Antonio, San Antonio, Texas 78249, United States

\*Email: oleg.larionov@utsa.edu, michael.doyle@utsa.edu

**Table of Contents**

|     |                                                                            |      |
|-----|----------------------------------------------------------------------------|------|
| 1.  | General conditions                                                         | S2   |
| 2.  | Optimization for the reaction conditions for the formation of pyridones    | S3   |
| 3.  | General procedure for the synthesis of 1,2,3-triazine 1-oxide compounds    | S4   |
| 4.  | General procedures for synthesis of pyridone and pyridylpyridone compounds | S5   |
| 5.  | Analytical and spectral characterization data for products                 | S6   |
| 6.  | Preparative scale reaction                                                 | S15  |
| 7.  | Crystallographic data                                                      | S15  |
| 8.  | Computational data                                                         | S18  |
| 9.  | NMR spectra                                                                | S85  |
| 10. | References                                                                 | S115 |

## 1. General conditions

All reactions, unless noted, were performed in oven-dried (150 °C) glassware with magnetic stirring under an atmosphere of air. Analytical thin layer chromatography (TLC) was carried out using EM Science silica gel 60 F254 plates; visualization was accomplished with UV light (254 nm). Column chromatography was performed on CombiFlash® Rf200 and Rf+ purification systems using normal phase disposable columns. NMR spectra were recorded on a Bruker spectrometer (500 MHz and 300 MHz) and calibrated using the resonance signal of the residual undeuterated solvent for  $^1\text{H}$ -NMR [ $\delta_{\text{H}} = 7.26$  ppm ( $\text{CDCl}_3$ )] and deuterated solvent for  $^{13}\text{C}$ -NMR [ $\delta_{\text{C}} = 77.16$  ( $\text{CDCl}_3$ )] as an internal reference at 298 K. Spectra were reported as follows: chemical shift ( $\delta$  ppm), multiplicity (Mi), coupling constants (Hz), integration and assignment. The peak information was described as: br = broad, s = singlet, d = doublet, t = triplet, q = quartet, dd = doublet of doublet, m = multiplet, and comp = composite of magnetically non-equivalent protons.  $^{13}\text{C}$ -NMR spectra were collected on Bruker instruments (126 MHz and 75 MHz) with complete proton decoupling. High-resolution mass spectra (HRMS) were performed on a Bruker MicroTOFESI mass spectrometer with an ESI resource using CsI or LTQ ESI positive ion calibration solution as the standard. Tetrahydrofuran, dichloromethane, chloroform were purified using a JC-Meyer solvent purification system.

**Materials:** All  $\beta$ -keto-esters, DBU (1,8-diazabicyclo[5.4.0]undec-7-ene), DABCO (1,4-diazabicyclo[2.2.2]octane), DMAP (4-dimethylaminopyridine),  $\text{Et}_3\text{N}$  (triethylamine),  $\text{Cs}_2\text{CO}_3$ ,  $\text{CsOH}$ ,  $\text{CsOAc}$ ,  $\text{K}_2\text{CO}_3$ , and  $\text{Na}_2\text{CO}_3$  were purchased from Sigma Aldrich, TCI, and Alfa Aesar, and they were used without further purification. 1,2,3-Triazine-1-oxides were prepared by the reported literature procedure.<sup>1,2</sup>

### 1,2,3-Triazine 1-oxides used in the study

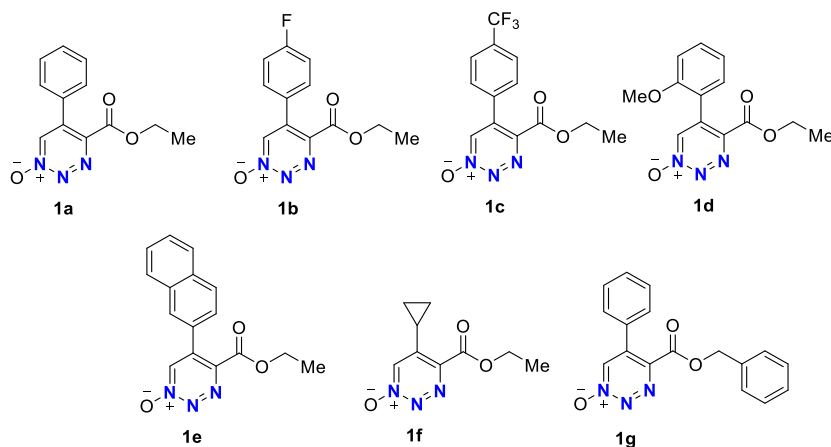

**2. Table S1. Optimization for the reaction conditions for the formation of pyridone compounds**

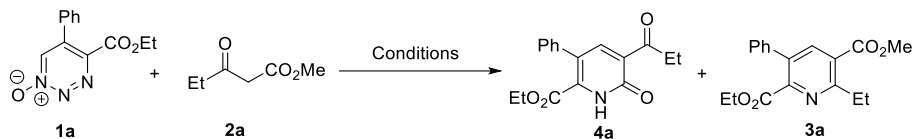

| Entry           | Conditions                              | Base                            | Yield of <b>4a</b><br>(%) <sup>a</sup> | Yield of <b>3a</b><br>(%) <sup>a</sup> |
|-----------------|-----------------------------------------|---------------------------------|----------------------------------------|----------------------------------------|
| 1               | CHCl <sub>3</sub> , 4 h, rt             | Cs <sub>2</sub> CO <sub>3</sub> | 76                                     | 14                                     |
| 2               | CHCl <sub>3</sub> , 12 h, rt            | K <sub>2</sub> CO <sub>3</sub>  | -                                      | 81                                     |
| 3               | CHCl <sub>3</sub> , 72 h, rt            | Na <sub>2</sub> CO <sub>3</sub> | -                                      | 42                                     |
| 4               | CHCl <sub>3</sub> , 72 h, 60 °C         | Na <sub>2</sub> CO <sub>3</sub> | -                                      | 64                                     |
| 9b              | CHCl <sub>3</sub> , 24 h, rt            | Ag <sub>2</sub> CO <sub>3</sub> | -                                      | -                                      |
| 6               | THF, 6 h, rt                            | Cs <sub>2</sub> CO <sub>3</sub> | 53                                     | 35                                     |
| 7               | DCM, 6 h, rt                            | Cs <sub>2</sub> CO <sub>3</sub> | 70                                     | 20                                     |
| 8               | ACN, 6 h, rt                            | Cs <sub>2</sub> CO <sub>3</sub> | 62                                     | 12                                     |
| 9 <sup>c</sup>  | CHCl <sub>3</sub> , 4 h, rt             | Cs <sub>2</sub> CO <sub>3</sub> | 64                                     | 18                                     |
| 10 <sup>d</sup> | CHCl <sub>3</sub> , 4 h, rt             | Cs <sub>2</sub> CO <sub>3</sub> | 75                                     | 15                                     |
| 11 <sup>e</sup> | CHCl <sub>3</sub> , 18-crown-6, 6 h, rt | Cs <sub>2</sub> CO <sub>3</sub> | -                                      | 72                                     |
| 12              | HFIP, rt, 24 h                          | Cs <sub>2</sub> CO <sub>3</sub> | -                                      | 84                                     |
| 13              | CHCl <sub>3</sub> , 0 °C, 6 h           | Cs <sub>2</sub> CO <sub>3</sub> | 64                                     | 18                                     |
| 14 <sup>f</sup> | CHCl <sub>3</sub> , 60 °C, 2 h          | Cs <sub>2</sub> CO <sub>3</sub> | 86                                     | <5                                     |
| 15 <sup>g</sup> | CHCl <sub>3</sub> , 60 °C, 1.5 h        | Cs <sub>2</sub> CO <sub>3</sub> | 93 (91)                                | trace                                  |
| 16 <sup>h</sup> | CHCl <sub>3</sub> , 6 h                 | CsF                             | NR                                     | -                                      |
| 17 <sup>i</sup> | CHCl <sub>3</sub> , 6 h                 | CsOAc                           | NR                                     | -                                      |
| 18              | CHCl <sub>3</sub> , 1 h                 | CsOH                            | 70                                     | trace                                  |
| 19              | CHCl <sub>3</sub> , rt, 24 h            | Et <sub>3</sub> N               | -                                      | 13                                     |
| 20              | CHCl <sub>3</sub> , rt, 24 h            | DMAP                            | -                                      | 95                                     |
| 21              | CHCl <sub>3</sub> , rt, 24 h            | DABCO                           | -                                      | 93                                     |
| 22              | CHCl <sub>3</sub> , rt, 10 min          | DBU                             | -                                      | 97                                     |

Reaction conditions: 1 mL solution of triazine 1-oxide **1a** (0.1 mmol) was added to a stirred solution of ketoester **2a** (0.15 mmol) and base (0.2 mmol) over 30 minutes. <sup>a</sup>NMR yields. Isolated yield in parenthesis. <sup>b</sup> 92% of **1a** was detected. <sup>c</sup>0.5 equiv. of Cs<sub>2</sub>CO<sub>3</sub>. <sup>d</sup> 1.0 equiv. of Cs<sub>2</sub>CO<sub>3</sub>. <sup>e</sup>2.0 equiv. of 18-crown-6 was used. <sup>f</sup> triazine 1-oxide **1a** was added at rt and then temperature was increased to 60 °C. <sup>g</sup> triazine 1-oxide **1a** was added to a preheated solution of ketoester **2a** (0.15 mmol) and Cs<sub>2</sub>CO<sub>3</sub> at 60 °C. <sup>h</sup> 94% of **1a** was detected. <sup>i</sup>93% of **1a** was detected.

### 3. General procedure for the synthesis of 1,2,3-triazine 1-oxide compounds 1a-1g

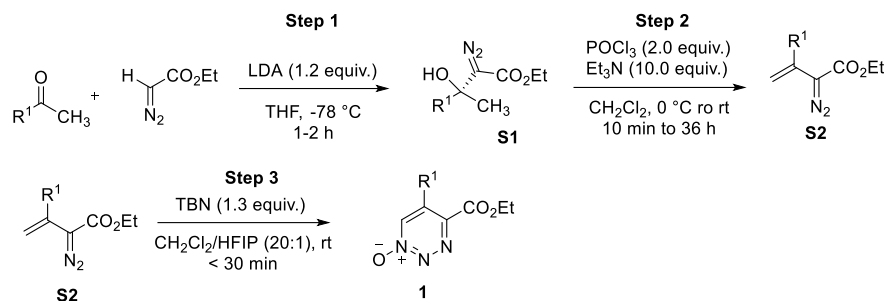

**Step 1:** Following the reported procedure.<sup>1</sup> To a solution of ketone (10.0 mmol, 1.00 equiv.) and ethyl diazoacetate (10.0 mmol, 1.00 equiv.) in 20 mL of dry THF at -78 °C, was slowly added a solution of freshly prepared LDA (12.0 mmol, 1.20 equiv. 1.0 M in THF) over 30 minutes using a syringe pump. The resulting solution was quenched with water after stirring at -78 °C for 1-2 h. The reaction solution was extracted with ethyl acetate (3 x 15 mL), and the combined organic layer was washed with brine and then dried over anhydrous MgSO<sub>4</sub>. After the solvent was evaporated, the crude product was purified by flash chromatography (% hexanes in ethyl acetate = 2%-10%) to give the  $\beta$ -hydroxy diazo **S1** compounds in 45%-83% yield. These compounds are stable at 0 °C and could be stored for months.

**Step 2:** Following the reported procedure.<sup>1</sup> To a solution of the **S1** compound (1.0 mmol, 1.0 equiv.) and Et<sub>3</sub>N (1.4 mL, 10 mmol, 10 equiv.) in 10 mL CH<sub>2</sub>Cl<sub>2</sub> at 0 °C was slowly added a solution of POCl<sub>3</sub> (300 mg, 2.0 mmol, 2 equiv.) in 4 mL of CH<sub>2</sub>Cl<sub>2</sub> over 5 min. The reaction solution was warmed to room temperature, and the progress of the reaction was followed by TLC until consumption of the  $\beta$ -hydroxy diazo compound was complete. The reaction solution was quenched with water and extracted with ethyl acetate (3 x 10 mL), and the combined organic layer was dried over anhydrous MgSO<sub>4</sub>. After the solvent was evaporated, the crude product was purified by flash chromatography (% ethyl acetate in hexanes = 2%-5%) to give the vinyl diazo **S2** compound in 50%-90% yield. These compounds are not stable, slowly undergoing intramolecular cycloaddition to pyrazoles, and were used immediately following their preparation.

**Step 3:** Following the reported procedure,<sup>2</sup> <sup>t</sup>BuONO (1.3 mmol, 1.3 equiv.) was added to 10 mL solution containing 20:1 v/v DCM:HFIPA (HFIPA = hexafluoroisopropyl alcohol), and the vinyl diazo compound **S2** (1.0 mmol, 1.0 equiv., 0.10 M in DCM) was added dropwise to the solution over 5 minutes. The reaction solution was stirred at room temperature under air for 1 h. After the solvent was evaporated, the crude product was purified by flash chromatography (% ethyl acetate in hexanes = 20%-50%) to give the 1,2,3-triazine 1-oxide **1** in 80%-99% yields. These compounds are bench stable and could be stored for months.



#### 4. General procedures for synthesis of pyridone and pyridylpyridone compounds

##### Synthesis of pyridone compounds from 1,2,3-triazine 1-oxides and $\beta$ -ketoesters.

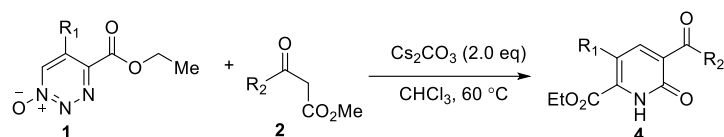

A chloroform solution (1.0 mL) of 1,2,3-triazine 1-oxide derivative **1** (0.1 mmol, 1 equiv.) was added dropwise over 30 minutes to a 1.0 mL solution of  $\text{CHCl}_3$  containing  $\beta$ -keto ester **2** (0.15 mmol, 1.5 equiv.) and a  $\text{Cs}_2\text{CO}_3$  (0.2 mmol, 65.2 mg) at  $60^\circ\text{C}$ . The reaction was continued for 30-90 minutes at same temperature. After the completion of the reaction (monitored by TLC), the reaction mixture was cooled to room temperature, then diluted with 5.0 mL of dichloromethane. The organic layer was washed with saturated ammonium chloride solution (5.0 mL) followed by water and brine solution, then dried over anhydrous  $\text{MgSO}_4$ , filtered, and the solvent was evaporated under reduced pressure. The product mixture was purified by flash chromatography (ethyl acetate in hexanes = 20-60%) to give the pyridone compound **4** with yields of 80-94%.

##### Synthesis of symmetrical pyridylpyridones compounds from 1,2,3-triazine 1-oxides and $\beta$ -ketoesters.

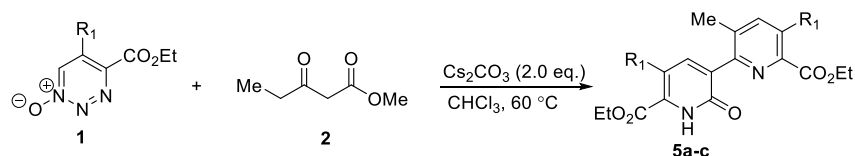

A chloroform solution (1.0 mL) of 1,2,3-triazine 1-oxide derivative **1** (0.1 mmol, 1 equiv.) was added dropwise over 30 minutes to a 0.5 mL solution of  $\text{CHCl}_3$  containing  $\beta$ -keto ester **2** (0.05 mmol, 0.5 equiv.) and a  $\text{Cs}_2\text{CO}_3$  (0.1 mmol, 32.5 mg) at  $60^\circ\text{C}$ . The reaction was continued for 4-6 h at same temperature. After the completion of the reaction (monitored by TLC), the reaction mixture was cooled to room temperature, then diluted with 5.0 mL of dichloromethane. The organic layer was washed with saturated ammonium chloride solution (5.0 mL) followed by water and brine solution, then dried over anhydrous  $\text{MgSO}_4$ , filtered, and the solvent was evaporated under reduced pressure. The product mixture was purified by flash chromatography (ethyl acetate in hexanes = 30-70%) to give 2-pyridyl-3-pyridones **9a-c** with yields of 86-90%.

##### Synthesis of unsymmetrical pyridylpyridones compounds from 1,2,3-triazine 1-oxides and pyridones.

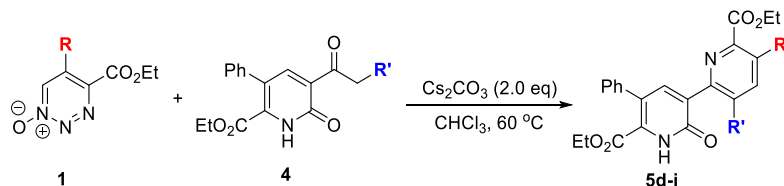

1,2,3-Triazine 1-oxide derivative **1** (0.1 mmol, 1.0 equiv.) was added all at once to a 1.0 mL solution of  $\text{CHCl}_3$  containing pyridone **4** (0.1 mmol, 1.0 equiv.) and  $\text{Cs}_2\text{CO}_3$  (0.2 mmol, 65.2 mg) at  $60^\circ\text{C}$ . The reaction was continued for 4-12 h at same temperature. After the completion of the reaction (monitored by TLC), the reaction mixture was cooled to room temperature, then diluted with 5.0 mL of dichloromethane. The organic layer was washed with saturated ammonium chloride

solution (5.0 mL) followed by water and brine solution, then dried over anhydrous  $\text{MgSO}_4$ , filtered, and the solvent was evaporated under reduced pressure. The product mixture was purified by flash chromatography (ethyl acetate in hexanes = 30-70%) to give 2-pyridyl-3-pyridones **9d-i** with yields of 72-90%.

## 5. Analytical and spectral characterization data for products

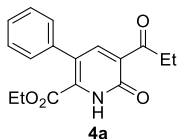

**Ethyl 6-Oxo-3-phenyl-5-propionyl-1,6-dihydropyridine-2-carboxylate, 4a:** White solid (27.2 mg, 91% yield) 0.1 mmol scale reaction. Flash column chromatography conditions: hexane:ethyl acetate = 1:1. Mp 108-110 °C.  $^1\text{H NMR}$  (500 MHz,  $\text{CDCl}_3$ )  $\delta$  10.02 (br s, 1H), 8.15 (s, 1H), 7.48-7.37 (comp, 3H), 7.28 (d,  $J = 7.5$  Hz, 2H), 4.19 (q,  $J = 7.2$  Hz, 2H), 3.21 (q,  $J = 7.2$  Hz, 2H), 1.21 (t,  $J = 7.2$  Hz, 3H), 1.05 (t,  $J = 7.2$  Hz, 3H).  $^{13}\text{C NMR}$  (126 MHz,  $\text{CDCl}_3$ )  $\delta$  201.2, 162.1, 160.6, 146.2, 137.5, 136.7, 129.0, 128.9, 128.4, 128.3, 125.4, 62.9, 35.6, 13.59, 8.0. **HRMS** (ESI)  $m/z$ :  $[\text{M} + \text{H}]^+$  Calcd for  $\text{C}_{17}\text{H}_{17}\text{NO}_4$  300.1230; Found: 300.1229.

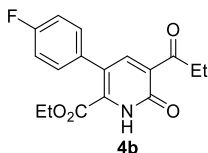

**Ethyl 3-(4-Fluorophenyl)-6-oxo-5-propionyl-1,6-dihydropyridine-2-carboxylate, 4b:** White solid (26.9 mg, 85% yield) 0.1 mmol scale reaction. Flash column chromatography conditions: hexane:ethyl acetate = 1:1. Mp 142-144 °C.  $^1\text{H NMR}$  (500 MHz,  $\text{CDCl}_3$ )  $\delta$  9.95 (br s, 1H), 8.08 (s, 1H), 7.23 (d,  $J = 8.4$  Hz, 2H), 7.10 (d,  $J = 8.4$  Hz, 2H), 4.20 (q,  $J = 7.1$  Hz, 2H), 3.19 (q,  $J = 7.2$  Hz, 2H), 1.19 (t,  $J = 7.2$  Hz, 3H), 1.08 (t,  $J = 7.1$  Hz, 3H).  $^{13}\text{C NMR}$  (126 MHz,  $\text{CDCl}_3$ )  $\delta$  201.0, 162.8 (d,  $J_{\text{C-F}} = 240$  Hz), 161.9, 160.4, 146.1, 132.7, 132.6, 130.8, 130.7 (d,  $J_{\text{C-F}} = 8$  Hz), 124.3, 115.4 (d,  $J_{\text{C-F}} = 21$  Hz), 63.1, 35.8, 13.7, 8.0.  $^{19}\text{F NMR}$  (471 MHz,  $\text{CDCl}_3$ )  $\delta$  -113.5. **HRMS** (ESI)  $m/z$ :  $[\text{M} + \text{H}]^+$  Calcd for  $\text{C}_{17}\text{H}_{16}\text{FNO}_4$  318.1136; Found: 318.1134.

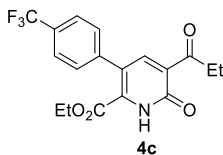

**Ethyl 6-Oxo-5-propionyl-3-(4-trifluoromethylphenyl)-1,6-dihydropyridine-2-carboxylate, 4c:** White solid (30.8 mg, 84% yield) 0.1 mmol scale reaction. Flash column chromatography conditions: hexane:ethyl acetate = 1:1. Mp 165-167 °C.  $^1\text{H NMR}$  (500 MHz,  $\text{CDCl}_3$ )  $\delta$  10.31 (br s, 1H), 8.09 (s, 1H), 7.67 (d,  $J = 7.9$  Hz, 2H), 7.39 (d,  $J = 7.9$  Hz, 2H), 4.19 (q,  $J = 7.1$  Hz, 2H), 3.19 (q,  $J = 7.1$  Hz, 2H), 1.19 (t,  $J = 7.1$  Hz, 3H), 1.03 (t,  $J = 7.1$  Hz, 3H).  $^{13}\text{C NMR}$  (126 MHz,  $\text{CDCl}_3$ )  $\delta$  200.8, 161.5, 160.5, 145.7, 140.5, 130.5 (q,  $J_{\text{C-F}} = 32$  Hz), 129.4, 125.4 (q,  $J_{\text{C-F}} = 3$  Hz), 125.2, 123.7, 123.4 (q,  $J_{\text{C-F}} = 289$  Hz), 123.0, 63.2, 35.8, 13.5, 8.0.  $^{19}\text{F NMR}$  (471 MHz,  $\text{CDCl}_3$ )  $\delta$  -62.7. **HRMS** (ESI)  $m/z$ :  $[\text{M} + \text{H}]^+$  Calcd for  $\text{C}_{18}\text{H}_{16}\text{F}_3\text{NO}_4$  368.1104; Found: 368.1102.

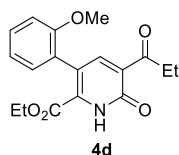

**Ethyl 3-(2-Methoxyphenyl)-6-oxo-5-propionyl-1,6-dihydropyridine-2-carboxylate, 4d;** White solid (29.6 mg, 90% yield) 0.1 mmol scale reaction. Flash column chromatography conditions: hexane:ethyl acetate = 1:1. Mp 140-142 °C. **<sup>1</sup>H NMR** (500 MHz, CDCl<sub>3</sub>) δ 10.27 (br s, 1H), 8.15 (s, 1H), 7.33 (t, *J* = 7.5 Hz, 1H), 6.95 (comp, 1H), 6.89-6.78 (comp, 2H), 4.21 (q, *J* = 7.1 Hz, 2H), 3.84 (s, 3H), 3.20 (q, *J* = 7.1 Hz, 2H), 1.21 (t, *J* = 7.1 Hz, 3H), 1.08 (t, *J* = 7.1 Hz, 3H). **<sup>13</sup>C NMR** (126 MHz, CDCl<sub>3</sub>) δ 201.3, 162.2, 160.7, 159.6, 146.0, 145.9, 137.9, 129.5, 129.4, 125.2, 121.3, 114.6, 113.7, 62.9, 55.5, 35.6, 13.6, 8.0. **HRMS** (ESI) *m/z*: [M + H]<sup>+</sup> Calcd for C<sub>18</sub>H<sub>19</sub>NO<sub>5</sub> 330.1336; Found: 330.1334.

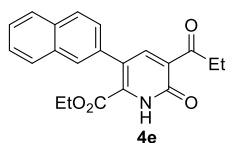

**Ethyl 3-(Naphthalen-2-yl)-6-oxo-5-propionyl-1,6-dihydropyridine-2-carboxylate, 4e;** White solid (32.1 mg, 92% yield) 0.1 mmol scale reaction. Flash column chromatography conditions: hexane:ethyl acetate = 1:1. Mp 155-157 °C. **<sup>1</sup>H NMR** (500 MHz, CDCl<sub>3</sub>) δ 10.41 (br s, 1H), 8.23 (s, 1H), 7.89-7.83 (comp, 3H), 7.74 (s, 1H), 7.55-7.51 (comp, 2H), 7.36 (d, *J* = 8.3 Hz, 1H), 4.15 (q, *J* = 7.1 Hz, 2H), 3.21 (q, *J* = 7.2 Hz, 2H), 1.20 (t, *J* = 7.1 Hz, 3H), 0.93 (t, *J* = 7.2 Hz, 3H). **<sup>13</sup>C NMR** (126 MHz, CDCl<sub>3</sub>) δ 201.2, 162.0, 160.6, 146.4, 134.1, 133.1, 132.9, 128.1, 128.0, 127.9, 127.9, 127.8, 127.0, 126.9, 126.7, 126.7, 125.3, 63.0, 35.8, 13.6, 8.0. **HRMS** (ESI) *m/z*: [M + H]<sup>+</sup> Calcd for C<sub>21</sub>H<sub>19</sub>NO<sub>4</sub> 350.1387; Found: 350.1385.

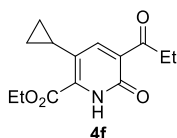

**Ethyl 3-Cyclopropyl-6-oxo-5-propionyl-1,6-dihydropyridine-2-carboxylate, 4f;** White solid (21.0 mg, 80% yield) 0.1 mmol scale reaction. Flash column chromatography conditions: hexane:ethyl acetate = 1:1. Mp 98-100 °C. **<sup>1</sup>H NMR** (500 MHz, CDCl<sub>3</sub>) δ 9.93 (br s, 1H), 7.79 (s, 1H), 4.46 (q, *J* = 7.1 Hz, 2H), 3.16 (q, *J* = 7.1 Hz, 2H), 2.56 (tt, *J* = 8.6, 4.4 Hz, 1H), 1.43 (t, *J* = 7.1 Hz, 3H), 1.15 (t, *J* = 7.1 Hz, 3H), 1.08- 0.97 (comp, 2H), 0.72-0.70 (comp, 2H). **<sup>13</sup>C NMR** (126 MHz, CDCl<sub>3</sub>) δ 200.7, 161.4, 159.6, 142.8, 127.9, 126.8, 126.5, 63.2, 36.2, 14.3, 11.2, 8.1, 7.9. **HRMS** (ESI) *m/z*: [M + H]<sup>+</sup> Calcd for C<sub>14</sub>H<sub>17</sub>NO<sub>4</sub> 264.1230; Found: 264.1227.

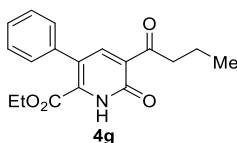

**Ethyl 5-Butyl-6-oxo-3-phenyl-1,6-dihydropyridine-2-carboxylate, 4g;** White solid (29.4 mg, 94% yield) 0.1 mmol scale reaction. Flash column chromatography conditions: hexane:ethyl

acetate = 2:1. Mp 128-130 °C. **<sup>1</sup>H NMR** (500 MHz, CDCl<sub>3</sub>) δ 10.46 (br s, 1H), 8.14 (s, 1H), 7.51-7.33 (comp, 3H), 7.28 (dd, *J* = 6.7, 2.5 Hz, 2H), 4.19 (q, *J* = 7.1 Hz, 2H), 3.16 (t, *J* = 7.1 Hz, 2H), 1.77-1.73 (comp, 2H), 1.06 (t, *J* = 7.1 Hz, 3H), 1.00 (t, *J* = 7.2 Hz, 3H). **<sup>13</sup>C NMR** (126 MHz, CDCl<sub>3</sub>) δ 200.8, 162.2, 160.7, 146.1, 136.7, 128.8, 128.7, 128.5, 128.4, 128.3, 125.4, 62.9, 44.0, 17.4, 13.9, 13.6. **HRMS** (ESI) *m/z*: [M + H]<sup>+</sup> Calcd for C<sub>18</sub>H<sub>19</sub>NO<sub>4</sub> 314.1387; Found: 314.1385.

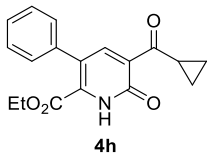

**Ethyl 5-(Cyclopropanecarbonyl)-6-oxo-3-phenyl-1,6-dihydropyridine-2-carboxylate, 4h**; White solid (27.7 mg, 89% yield) 0.1 mmol scale reaction. Flash column chromatography conditions: hexane:ethyl acetate = 1:1. Mp 136-138 °C. **<sup>1</sup>H NMR** (500 MHz, CDCl<sub>3</sub>) δ 10.74 (br s, 1H), 8.14 (s, 1H), 7.43-7.40 (comp, 3H), 7.34-7.24 (comp, 2H), 4.19 (q, *J* = 7.1 Hz, 2H), 3.26-3.23 (m, 1H), 1.30-1.28 (comp, 2H), 1.15-1.12 (comp, 2H), 1.05 (t, *J* = 7.1 Hz, 3H). **<sup>13</sup>C NMR** (126 MHz, CDCl<sub>3</sub>) δ 201.0, 162.3, 161.1, 145.7, 145.6, 136.7, 128.8, 128.4, 128.3, 128.2, 125.5, 62.8, 19.6, 13.7, 13.6. **HRMS** (ESI) *m/z*: [M + H]<sup>+</sup> Calcd for C<sub>18</sub>H<sub>17</sub>NO<sub>4</sub> 312.1230; Found: 312.1229.

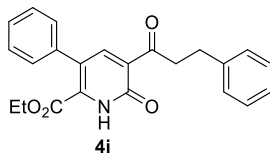

**Ethyl 6-Oxo-3-phenyl-5-(3-phenylpropanoyl)-1,6-dihydropyridine-2-carboxylate, 4i**; White solid (34.9 mg, 93% yield) 0.1 mmol scale reaction. Flash column chromatography conditions: hexane:ethyl acetate = 1:1. Mp 148-150 °C. **<sup>1</sup>H NMR** (500 MHz, CDCl<sub>3</sub>) δ 10.10 (br s, 1H), 8.13 (s, 1H), 7.45 – 7.38 (comp, 3H), 7.32 – 7.23 (comp, 6H), 7.21 (dd, *J* = 6.7, 2.1 Hz, 1H), 4.16 (q, *J* = 7.1 Hz, 2H), 3.53 (t, *J* = 7.5 Hz, 2H), 3.06 (t, *J* = 7.5 Hz, 2H), 1.03 (t, *J* = 7.1 Hz, 3H). **<sup>13</sup>C NMR** (126 MHz, CDCl<sub>3</sub>) δ 199.3, 161.7, 160.2, 146.6, 141.0, 136.5, 129.2, 128.7, 128.7, 128.6, 128.4, 128.3, 128.2, 126.0, 125.0, 62.9, 43.9, 29.9, 13.4. **HRMS** (ESI) *m/z*: [M + H]<sup>+</sup> Calcd for C<sub>23</sub>H<sub>21</sub>NO<sub>4</sub> 376.1543; Found: 376.1542.

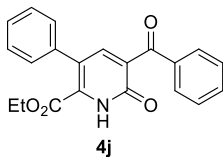

**Ethyl 5-Benzoyl-6-oxo-3-phenyl-1,6-dihydropyridine-2-carboxylate, 4j**; White solid (32.7 mg, 94% yield) 0.1 mmol scale reaction. Flash column chromatography conditions: hexane:ethyl acetate = 1:1. Mp 140-142 °C. **<sup>1</sup>H NMR** (500 MHz, CDCl<sub>3</sub>) δ 10.81 (br s, 1H), 7.91 (d, *J* = 7.6 Hz, 2H), 7.76 (s, 1H), 7.62 (t, *J* = 7.6 Hz, 1H), 7.50 (t, *J* = 7.6 Hz, 2H), 7.42-7.40 (comp, 3H), 7.34 – 7.25 (comp, 2H), 4.14 (q, *J* = 7.1 Hz, 2H), 1.03 (t, *J* = 7.1 Hz, 3H). **<sup>13</sup>C NMR** (126 MHz, CDCl<sub>3</sub>) δ 193.9, 161.6, 160.0, 145.4, 136.6, 136.4, 135.4, 133.7, 132.5, 129.8, 128.8, 128.7, 128.4, 128.3, 124.9, 62.9, 13.6. **HRMS** (ESI) *m/z*: [M + H]<sup>+</sup> Calcd for C<sub>21</sub>H<sub>17</sub>NO<sub>4</sub> 348.1230; Found: 348.1228.

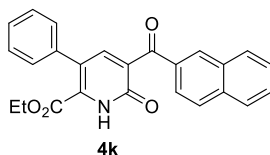

**Ethyl 5-(2-Naphthoyl)-6-oxo-3-phenyl-1,6-dihydropyridine-2-carboxylate, 4k;** White solid (34.1 mg, 86% yield) 0.1 mmol scale reaction. Flash column chromatography conditions: hexane:ethyl acetate = 1:1. Mp 163-165 °C. <sup>1</sup>H NMR (500 MHz, CDCl<sub>3</sub>) δ 10.61 (br s, 1H), 8.39 (s, 1H), 8.04 – 7.87 (comp, 4H), 7.82 (s, 1H), 7.62-7.58 (comp, 2H), 7.43-7.38 (comp, 3H), 7.35 – 7.25 (comp, 2H), 4.13 (q, *J* = 7.1 Hz, 2H), 1.02 (t, *J* = 7.1 Hz, 3H). <sup>13</sup>C NMR (126 MHz, CDCl<sub>3</sub>) δ 193.7, 161.5, 160.0, 145.4, 136.5, 136.0, 135.0, 133.8, 133.2, 132.5, 132.1, 129.8, 128.9, 128.8, 128.5, 128.4, 128.3, 127.9, 126.9, 124.8, 62.9, 13.5. HRMS (ESI) *m/z*: [M + H]<sup>+</sup> Calcd for C<sub>25</sub>H<sub>19</sub>NO<sub>4</sub> 398.1387; Found: 398.1387.

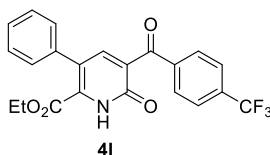

**Ethyl 6-Oxo-3-phenyl-5-(4-(trifluoromethyl)benzoyl)-1,6-dihydropyridine-2-carboxylate, 4l;** White solid (37.3 mg, 90% yield) 0.1 mmol scale reaction. Flash column chromatography conditions: hexane:ethyl acetate = 1:1. Mp 176-178 °C. <sup>1</sup>H NMR (500 MHz, CDCl<sub>3</sub>) δ 10.68 (br s, 1H), 8.01 (d, *J* = 8.0 Hz, 2H), 7.85 (s, 1H), 7.76 (d, *J* = 8.0 Hz, 2H), 7.43-7.41 (comp, 3H), 7.32 – 7.26 (comp, 2H), 4.14 (q, *J* = 7.2 Hz, 2H), 1.01 (t, *J* = 7.2 Hz, 3H). <sup>13</sup>C NMR (126 MHz, CDCl<sub>3</sub>) δ 192.7, 161.3, 159.6, 146.7, 139.4, 136.3, 135.0, 138.8, 134.6, 132.5, 129.9, 128.9, 128.5, 125.6 (q, *J*<sub>C-F</sub> = 4 Hz), 124.7, 123.5 (q, *J*<sub>C-F</sub> = 260 Hz), 63.1, 13.5. HRMS (ESI) *m/z*: [M + H]<sup>+</sup> Calcd for C<sub>22</sub>H<sub>16</sub>F<sub>3</sub>NO<sub>4</sub> 416.1104; Found: 416.1102.

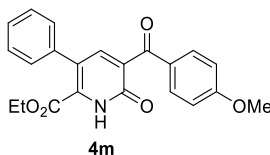

**Ethyl 5-(4-Methoxybenzoyl)-6-oxo-3-phenyl-1,6-dihydropyridine-2-carboxylate, 4m;** White solid (34.3, 91% yield) 0.1 mmol scale reaction. Flash column chromatography conditions: hexane:ethyl acetate = 1:1. Mp 168-170 °C. <sup>1</sup>H NMR (500 MHz, CDCl<sub>3</sub>) δ 10.40 (br s, 1H), 7.91 (d, *J* = 8.4 Hz, 2H), 7.71 (s, 1H), 7.46 – 7.37 (comp, 3H), 7.34 – 7.26 (comp, 2H), 6.97 (d, *J* = 8.4 Hz, 2H), 4.17 (q, *J* = 7.1 Hz, 2H), 3.90 (s, 3H), 1.04 (t, *J* = 7.1 Hz, 3H). <sup>13</sup>C NMR (126 MHz, CDCl<sub>3</sub>) δ 192.0, 164.3, 161.6, 159.7, 144.9, 136.7, 134.2, 133.6, 132.4, 129.3, 128.9, 128.4, 128.3, 125.0, 114.0, 77.4, 62.9, 55.7, 13.6. HRMS (ESI) *m/z*: [M + H]<sup>+</sup> Calcd for C<sub>22</sub>H<sub>20</sub>NO<sub>5</sub> 378.1336; Found: 378.1334.

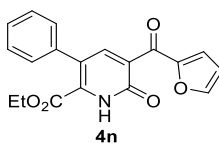

**Ethyl 5-(furan-2-carbonyl)-6-oxo-3-phenyl-1,6-dihydropyridine-2-carboxylate, 4n;** White solid (27.3 mg, 81% yield) 0.1 mmol scale reaction,. Flash column chromatography conditions: hexane:ethyl acetate = 1:1. Mp 102-104 °C. <sup>1</sup>H NMR (500 MHz, CDCl<sub>3</sub>) δ 10.19 (br s, 1H), 7.98 (s, 1H), 7.68 (s, 1H), 7.41-7.31 (comp, 4H), 7.29-7.27 (comp, 2H), 6.60 (d, *J* = 4.3 Hz, 1H), 4.18 (q, *J* = 7.2 Hz, 2H), 1.03 (t, *J* = 7.2 Hz, 3H). <sup>13</sup>C NMR (126 MHz, CDCl<sub>3</sub>) δ 179.8, 161.9, 159.8, 152.1, 147.9, 145.5, 136.7, 131.1, 129.1, 128.9, 128.5, 128.5, 125.3, 121.3, 112.9, 63.0, 13.6. HRMS (ESI) *m/z*: [M + H]<sup>+</sup> Calcd for C<sub>19</sub>H<sub>16</sub>NO<sub>5</sub> 338.1023; Found: 338.1022.

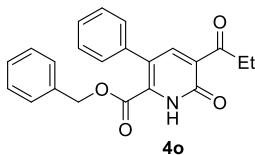

**Benzyl 6-oxo-3-phenyl-5-propionyl-1,6-dihydropyridine-2-carboxylate, 4o;** White solid (31.4 mg, 87% yield) 0.1 mmol scale reaction. Flash column chromatography conditions: hexane:ethyl acetate = 1:1. Mp 158-160 °C. <sup>1</sup>H NMR (500 MHz, CDCl<sub>3</sub>) δ 9.82 (br s, 1H), 8.10 (s, 1H), 7.38 – 7.25 (comp, 6H), 7.21 (d, *J* = 7.1 Hz, 2H), 6.99 (d, *J* = 7.1 Hz, 2H), 5.14 (s, 2H), 3.17 (q, *J* = 7.2 Hz, 2H), 1.19 (t, *J* = 7.2 Hz, 3H). <sup>13</sup>C NMR (126 MHz, CDCl<sub>3</sub>) δ 201.2, 162.2, 160.8, 146.1, 146.0, 136.5, 133.9, 128.8, 128.7, 128.6, 128.6, 128.5, 128.4, 128.3, 125.5, 68.6, 35.6, 8.0. HRMS (ESI) *m/z*: [M + H]<sup>+</sup> Calcd for C<sub>22</sub>H<sub>20</sub>NO<sub>4</sub> 362.1387; Found: 362.1387.

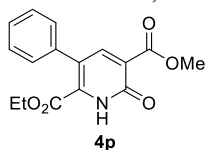

**2-Ethyl 5-methyl 6-oxo-3-phenyl-1,6-dihydropyridine-2,5-dicarboxylate, 4p;** White solid, (25.3 mg, 84% yield), 0.1 mmol scale reaction,. Flash column chromatography conditions: hexane:ethyl acetate = 1:1. mp 103-105 °C. <sup>1</sup>H NMR (500 MHz, CDCl<sub>3</sub>) δ 10.77 (br s, 1H), 8.25 (s, 1H), 7.48 – 7.38 (comp, 3H), 7.32-7.29 (comp, 2H), 4.21 (q, *J* = 7.1 Hz, 2H), 3.99 (s, 3H), 1.09 (t, *J* = 7.1 Hz, 3H). <sup>13</sup>C NMR (126 MHz, CDCl<sub>3</sub>) δ 166.9, 163.6, 161.3, 145.3, 136.6, 128.7, 128.6, 128.5, 128.5, 128.3, 127.0, 62.6, 53.1, 13.7. HRMS (ESI) *m/z*: [M + H]<sup>+</sup> Calcd for C<sub>16</sub>H<sub>15</sub>NO<sub>4</sub> 302.1023; Found: 302.1021.

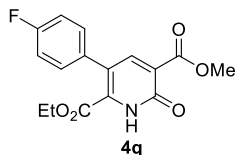

**2-Ethyl 5-methyl 3-(4-Fluorophenyl)-6-oxo-1,6-dihydropyridine-2,5-dicarboxylate, 4q;** White solid, (25.8 mg, 81% yield), 0.1 mmol scale reaction, Flash column chromatography conditions: hexane:ethyl acetate = 1:1. mp 145-147 °C. <sup>1</sup>H NMR (500 MHz, CDCl<sub>3</sub>) δ 10.73 (br s, 1H), 8.22 (s, 1H), 7.27-7.29 (comp, 2H), 7.14-7.12 (comp, 2H), 4.23 (q, *J* = 7.2 Hz, 2H), 4.00 (s, 3H), 1.14 (t, *J* = 7.2 Hz, 3H). <sup>13</sup>C NMR (126 MHz, CDCl<sub>3</sub>) δ. 166.9, 163.4, 162.7 (d, *J*<sub>C-F</sub> = 220 Hz), 161.3, 145.0, 132.6, 132.5, 130.5, 130.4, (d, *J*<sub>C-F</sub> = 4 Hz), 126.0, 115.5 (d, *J*<sub>C-F</sub> = 21 Hz), 62.6, 53.1, 13.7. <sup>19</sup>F NMR (471 MHz, CDCl<sub>3</sub>) δ -113.9. HRMS (ESI) *m/z*: [M + H]<sup>+</sup> Calcd for C<sub>16</sub>H<sub>14</sub>FNO<sub>5</sub> 320.0929; Found: 320.0928.

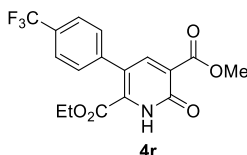

**2-Ethyl 5-methyl 6-oxo-3-(4-(Trifluoromethyl)phenyl)-1,6-dihydropyridine-2,5-dicarboxylate, 4r;** White solid, (29.5 mg, 80% yield), 0.1 mmol scale reaction,. Flash column chromatography conditions: hexane:ethyl acetate = 1:1. mp 162-164 °C.  $^1\text{H NMR}$  (500 MHz,  $\text{CDCl}_3$ )  $\delta$  10.84 (br s, 1H), 8.23 (s, 1H), 7.71 (d,  $J$  = 8.0 Hz, 2H), 7.45 (d,  $J$  = 8.0 Hz, 2H), 4.24 (q,  $J$  = 7.2 Hz, 2H), 4.01 (s, 3H), 1.12 (t,  $J$  = 7.2 Hz, 3H).  $^{13}\text{C NMR}$  (126 MHz,  $\text{CDCl}_3$ )  $\delta$  166.8, 163.2, 161.6, 144.7, 131.0, 130.4 (q,  $J_{\text{C-F}}$  = 37 Hz), 129.1, 125.4 (q,  $J_{\text{C-F}}$  = 7.2 Hz), 135.4, 123.5 (q,  $J_{\text{C-F}}$  = 7.2 Hz), 123.0 (q,  $J_{\text{C-F}}$  = 272 Hz), 120.7, 62.7, 53.2, 13.6.  $^{19}\text{F NMR}$  (471 MHz,  $\text{CDCl}_3$ )  $\delta$  -63.1. **HRMS** (ESI)  $m/z$ :  $[\text{M} + \text{H}]^+$  Calcd for  $\text{C}_{17}\text{H}_{14}\text{F}_3\text{NO}_5$  370.0897; Found: 370.0895.

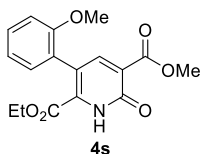

**2-Ethyl 5-methyl 3-(2-Methoxyphenyl)-6-oxo-1,6-dihydropyridine-2,5-dicarboxylate, 4s;** White solid, (28.1 mg, 85% yield), 0.1 mmol scale reaction, following procedure 2. Flash column chromatography conditions: hexane:ethyl acetate = 1:1. mp 94-96 °C.  $^1\text{H NMR}$  (500 MHz,  $\text{CDCl}_3$ )  $\delta$  10.54 (br s, 1H), 8.17 (s, 1H), 7.37-7.25 (m, 1H), 7.18-7.16 (m, 1H), 7.01 (t,  $J$  = 7.4 Hz, 1H), 6.90 (d,  $J$  = 8.2 Hz, 1H), 4.17 (q,  $J$  = 7.1 Hz, 2H), 3.94 (s, 3H), 3.73 (s, 3H), 1.06 (t,  $J$  = 7.1 Hz, 3H).  $^{13}\text{C NMR}$  (126 MHz,  $\text{CDCl}_3$ )  $\delta$  166.5, 162.8, 160.5, 156.4, 147.3, 132.3, 130.0, 129.9, 125.8, 122.2, 120.8, 120.3, 110.5, 62.4, 55.4, 53.0, 13.7. **HRMS** (ESI)  $m/z$ :  $[\text{M} + \text{H}]^+$  Calcd for  $\text{C}_{17}\text{H}_{17}\text{NO}_6$  332.1129; Found: 332.1130.

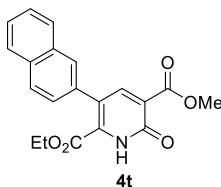

**2-Ethyl 5-methyl 3-(Naphthalen-2-yl)-6-oxo-1,6-dihydropyridine-2,5-dicarboxylate, 4t;** White solid, (28.8 mg, 82% yield), 0.1 mmol scale reaction, Flash column chromatography conditions: hexane:ethyl acetate = 1:1. mp 156-158 °C.  $^1\text{H NMR}$  (500 MHz,  $\text{CDCl}_3$ )  $\delta$  10.71 (br s, 1H), 8.24 (s, 1H), 7.90 (d,  $J$  = 8.3 Hz, 2H), 7.53-7.43 (comp, 4H), 7.32 (d,  $J$  = 7.0 Hz, 1H), 3.93 (s, 3H), 3.90 (t,  $J$  = 7.1 Hz, 2H), 0.59 (t,  $J$  = 7.1 Hz, 3H).  $^{13}\text{C NMR}$  (126 MHz,  $\text{CDCl}_3$ )  $\delta$  166.1, 162.2, 160.4, 147.2, 134.3, 133.4, 131.9, 128.7, 128.7, 128.7, 128.4, 126.8, 126.6, 126.1, 125.1, 124.8, 123.9, 62.4, 52.9, 13.0. **HRMS** (ESI)  $m/z$ :  $[\text{M} + \text{H}]^+$  Calcd for  $\text{C}_{20}\text{H}_{17}\text{NO}_5$  352.1179; Found: 352.1177.

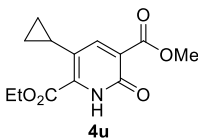

**2-Ethyl 5-methyl 3-cyclopropyl-6-oxo-1,6-dihydropyridine-2,5-dicarboxylate, 4u;** White solid, (19.6 mg, 74% yield), 0.1 mmol scale reaction,. Flash column chromatography conditions: hexane:ethyl acetate = 1:1. mp 130-132 °C.  $^1\text{H NMR}$  (500 MHz,  $\text{CDCl}_3$ )  $\delta$  10.29 (br s, 1H), 7.86

(s, 1H), 4.45 (q,  $J = 7.1$  Hz, 2H), 3.94 (s, 3H), 2.47-2.45 (m, 1H), 1.42 (t,  $J = 7.1$  Hz, 3H), 1.01 (comp, 2H), 0.67 (comp, 2H).  $^{13}\text{C}$  NMR (126 MHz,  $\text{CDCl}_3$ )  $\delta$  166.5, 162.7, 159.7, 142.8, 142.0, 142.0, 127.5, 62.8, 53.0, 14.3, 11.2, 8.1, 8.0. **HRMS** (ESI)  $m/z$ :  $[\text{M} + \text{H}]^+$  Calcd for  $\text{C}_{13}\text{H}_{15}\text{NO}_5$  266.1023; Found: 266.1021.

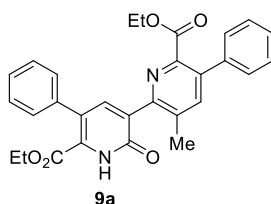

**Diethyl 3-methyl-2'-oxo-5,5'-diphenyl-1',2'-dihydro-[2,3'-bipyridine]-6,6'-dicarboxylate, 9a;** White solid (26.8 mg, 90% yield) 0.05 mmol scale reaction. Flash column chromatography conditions: hexane:ethyl acetate = 1:2. Mp 142-144 °C.  $^1\text{H}$  NMR (500 MHz,  $\text{CDCl}_3$ )  $\delta$  10.01 (br s, 1H), 7.78 (s, 1H), 7.66 (s, 1H), 7.45 – 7.35 (comp, 8H), 7.33 (dd,  $J = 6.3, 2.6$  Hz, 2H), 4.20 (q,  $J = 7.1$  Hz, 2H), 4.14 (q,  $J = 7.1$  Hz, 2H), 2.48 (s, 3H), 1.05 (t,  $J = 7.1$  Hz, 3H), 1.01 (t,  $J = 7.1$  Hz, 3H).  $^{13}\text{C}$  NMR (126 MHz,  $\text{CDCl}_3$ )  $\delta$  167.0, 161.3, 159.3, 151.9, 146.7, 145.4, 140.2, 138.2, 137.0, 136.8, 136.5, 135.4, 130.3, 129.0, 128.4, 128.3, 128.2, 128.0, 129.9, 125.5, 62.7, 61.5, 19.0, 13.6, 13.4. **HRMS** (ESI)  $m/z$ :  $[\text{M} + \text{H}]^+$  Calcd for  $\text{C}_{29}\text{H}_{26}\text{N}_2\text{O}_5$  483.1914; Found: 483.1918.

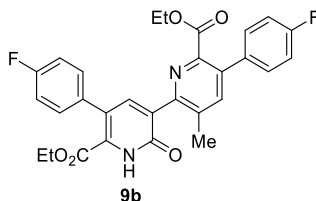

**Diethyl 5,5'-bis(4-Fluorophenyl)-3-methyl-2'-oxo-1',2'-dihydro-[2,3'-bipyridine]-6,6'-dicarboxylate, 9b;** White solid (22.3 mg, 86% yield) 0.05 mmol scale reaction. Flash column chromatography conditions: hexane:ethyl acetate = 1:2. Mp 162-164 °C.  $^1\text{H}$  NMR (500 MHz,  $\text{CDCl}_3$ )  $\delta$  10.06 (br s, 1H), 7.73 (s, 1H), 7.63 (s, 1H), 7.35-7.29 (comp, 4H), 7.15-7.09 (comp, 4H), 4.24 – 4.14 (comp, 4H), 2.48 (s, 3H), 1.10-1.04 (comp, 6H).  $^{13}\text{C}$  NMR (126 MHz,  $\text{CDCl}_3$ )  $\delta$  166.8, 162.7 (d,  $J_{\text{C-F}} = 252$  Hz), 162.6 (d,  $J_{\text{C-F}} = 250$  Hz), 161.1, 159.3, 152.0, 146.6, 145.2, 140.3, 136.5, 135.9, 135.6, 134.2 (d,  $J_{\text{C-F}} = 4$  Hz), 132.9 (d,  $J_{\text{C-F}} = 4$  Hz), 130.8 (d,  $J_{\text{C-F}} = 8$  Hz), 130.6, 130.0 (d,  $J_{\text{C-F}} = 8$  Hz), 124.3, 115.4 (d,  $J_{\text{C-F}} = 22$  Hz), 115.0 (d,  $J_{\text{C-F}} = 22$  Hz), 62.8, 61.6, 19.0, 13.7, 13.5.  $^{19}\text{F}$  NMR (471 MHz,  $\text{CDCl}_3$ )  $\delta$  -113.8, -114.0. **HRMS** (ESI)  $m/z$ :  $[\text{M} + \text{H}]^+$  Calcd for  $\text{C}_{29}\text{H}_{24}\text{F}_2\text{N}_2\text{O}_5$  519.1726; Found: 519.1728.

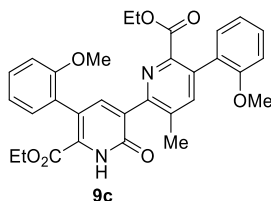

**Diethyl 5,5'-bis(2-Methoxyphenyl)-3-methyl-2'-oxo-1',2'-dihydro-[2,3'-bipyridine]-6,6'-dicarboxylate, 9c;** White solid (23.9 mg, 88% yield) 0.05 mmol scale reaction. Flash column chromatography conditions: hexane:ethyl acetate = 1:2. Mp 149-151 °C.  $^1\text{H}$  NMR (500 MHz,  $\text{CDCl}_3$ )  $\delta$  10.03 (br s, 1H), 7.76 (s, 1H), 7.60 (s, 1H), 7.39-7.34 (comp, 2H), 7.28 – 7.23 (comp, 2H), 7.08-6.99 (comp, 2H), 6.92 (d,  $J = 8.2$  Hz, 2H), 4.19-4.10 (comp, 4H), 3.77 (s, 3H), 3.74 (s,



3H), 2.48 (s, 3H), 1.09-1.04 (comp, 6H). **<sup>13</sup>C NMR** (126 MHz, CDCl<sub>3</sub>) δ 166.4, 161.7, 159.5, 156.4, 156.1, 151.8, 146.9, 146.0, 141.2, 136.2, 135.7, 133.8, 131.7, 130.3, 130.2, 130.00, 129.5, 129.4, 127.9, 126.1, 120.8, 120.4, 110.3, 110.1, 62.3, 61.0, 55.4, 55.1, 19.1, 13.7, 13.5. **HRMS** (ESI) m/z: [M + H]<sup>+</sup> Calcd for C<sub>31</sub>H<sub>30</sub>N<sub>2</sub>O<sub>7</sub> 543.2126; Found: 543.2132.

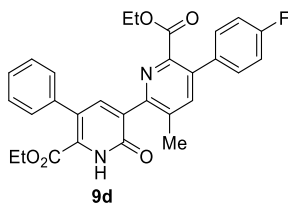

**Diethyl 5-(4-Fluorophenyl)-3-methyl-2'-oxo-5'-phenyl-1',2'-dihydro-[2,3'-bipyridine]-6,6'-dicarboxylate, 9d**; White solid (43.5 mg, 87% yield) 0.1 mmol scale reaction. Flash column chromatography conditions: hexane:ethyl acetate = 1:2. Mp 154-156 °C. **<sup>1</sup>H NMR** (500 MHz, CDCl<sub>3</sub>) δ 9.95 (br s, 1H), 7.77 (s, 1H), 7.63 (s, 1H), 7.42-7.39 (comp, 3H), 7.35-7.31 (comp, 4H), 7.14 (t, *J* = 8.4 Hz, 2H), 4.18 (comp, 4H), 2.48 (s, 3H), 1.05 (comp, 6H). **<sup>13</sup>C NMR** (126 MHz, CDCl<sub>3</sub>) δ 166.8, 162.7 (d, *J*<sub>C-F</sub> = 252 Hz), 161.4, 159.3, 152.2, 146.6, 145.4, 140.2, 137.0, 136.4, 135.8, 135.5, 134.2 (d, *J*<sub>C-F</sub> = 4 Hz), 130.4, 130.0 (d, *J*<sub>C-F</sub> = 9 Hz), 129.0, 128.0, 128.0, 125.4, 115.4 (d, *J*<sub>C-F</sub> = 25 Hz), 62.7, 61.6, 19.0, 13.7, 13.4. **<sup>19</sup>F NMR** (471 MHz, CDCl<sub>3</sub>) δ -114.0. **HRMS** (ESI) m/z: [M + H]<sup>+</sup> Calcd for C<sub>29</sub>H<sub>25</sub>FN<sub>2</sub>O<sub>5</sub> 501.1820; Found: 501.1823.

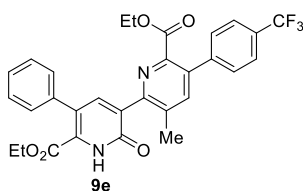

**Diethyl 3-Methyl-2'-oxo-5'-phenyl-5-(4-(Trifluoromethyl)phenyl)-1',2'-dihydro-[2,3'-bipyridine]-6,6'-dicarboxylate, 9e**; White solid (49.5 mg, 90% yield) 0.1 mmol scale reaction. Flash column chromatography conditions: hexane:ethyl acetate = 1:2. Mp 168-170 °C. **<sup>1</sup>H NMR** (500 MHz, CDCl<sub>3</sub>) δ 9.99 (br s, 1H), 7.78 (s, 1H), 7.71 (d, *J* = 8.0 Hz, 2H), 7.64 (s, 1H), 7.49 (d, *J* = 8.0 Hz, 2H), 7.44 – 7.39 (comp, 3H), 7.34-7.31 (comp, 2H), 4.23 – 4.13 (comp, 4H), 2.50 (s, 3H), 1.07 – 0.99 (comp, 6H). **<sup>13</sup>C NMR** (126 MHz, CDCl<sub>3</sub>) δ 166.3, 161.3, 159.2, 152.8, 146.2, 145.4, 142.1, 140.2, 136.6, 136.2, 135.9, 135.8, 130.5, 130.2 (q, *J*<sub>C-F</sub> = 32 Hz), 129.0, 128.7, 128.1, 128.0, 125.5, 125.3 (q, *J*<sub>C-F</sub> = 4 Hz), 124.1 (q, *J*<sub>C-F</sub> = 272 Hz), 62.7, 61.7, 19.1, 13.6, 13.4. **<sup>19</sup>F NMR** (471 MHz, CDCl<sub>3</sub>) δ -62.6. **HRMS** (ESI) m/z: [M + H]<sup>+</sup> Calcd for C<sub>30</sub>H<sub>25</sub>F<sub>3</sub>N<sub>2</sub>O<sub>5</sub> 551.1788; Found: 551.1793.

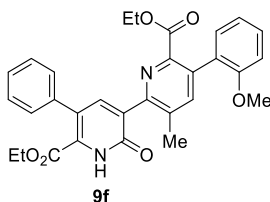

**Diethyl 5-(2-Methoxyphenyl)-3-methyl-2'-oxo-5'-phenyl-1',2'-dihydro-[2,3'-bipyridine]-6,6'-dicarboxylate, 9f**; White solid (45.6 mg, 89% yield) 0.1 mmol scale reaction. Flash column chromatography conditions: hexane:ethyl acetate = 1:2. Mp 150-152 °C. **<sup>1</sup>H NMR** (500 MHz, CDCl<sub>3</sub>) δ 10.01 (br s, 1H), 7.81 (s, 1H), 7.61 (s, 1H), 7.42-7.36 (comp, 4H), 7.35 – 7.31 (comp, 2H), 7.28-7.26 (comp, 1H), 7.07 (t, *J* = 8.2 Hz, 1H), 6.93 (d, *J* = 8.2 Hz, 1H), 4.19 (q, *J* = 7.5 Hz,

2H), 4.13 (q,  $J = 7.1$  Hz, 2H), 3.74 (s, 3H), 2.47 (s, 3H), 1.06-1.01 (comp, 6H).  $^{13}\text{C}$  NMR (126 MHz,  $\text{CDCl}_3$ )  $\delta$  166.3, 161.5, 159.4, 156.1, 151.5, 146.9, 145.3, 141.3, 137.1, 136.6, 135.7, 134.0, 130.4, 130.0, 129.5, 129.0, 128.0, 127.9, 127.8, 125.6, 120.8, 110.1, 62.6, 61.1, 55.1, 19.1, 13.7, 13.5. **HRMS** (ESI)  $m/z$ :  $[\text{M} + \text{H}]^+$  Calcd for  $\text{C}_{30}\text{H}_{28}\text{N}_2\text{O}_6$  513.2020; Found: 513.2022.

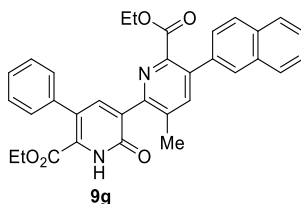

**Diethyl 3-Methyl-5-(naphthalen-2-yl)-2'-oxo-5'-phenyl-1',2'-dihydro-[2,3'-bipyridine]-6,6'-dicarboxylate, 9g**; White solid (45.8 mg, 86% yield) 0.1 mmol scale reaction. Flash column chromatography conditions: hexane:ethyl acetate = 1:2. Mp 172-174 °C.  $^1\text{H}$  NMR (500 MHz,  $\text{CDCl}_3$ )  $\delta$  9.87 (br s, 1H), 7.89 (d,  $J = 8.3$  Hz, 2H), 7.84 (s, 1H), 7.69 (s, 1H), 7.57 (d,  $J = 8.3$  Hz, 1H), 7.54 – 7.46 (comp, 2H), 7.45 – 7.37 (comp, 4H), 7.35-7.32 (comp, 3H), 4.19 (q,  $J = 7.1$  Hz, 2H), 3.80 (q,  $J = 7.1$  Hz, 2H), 2.49 (s, 3H), 1.03 (t,  $J = 7.1$  Hz, 3H), 0.53 (t,  $J = 7.1$  Hz, 3H).  $^{13}\text{C}$  NMR (126 MHz,  $\text{CDCl}_3$ )  $\delta$  166.0, 161.4, 159.3, 152.6, 147.1, 145.6, 141.7, 137.0, 136.6, 136.4, 136.0, 135.8, 133.3, 131.8, 130.4, 129.0, 128.2, 128.2, 128.1, 128.0, 127.9, 126.4, 126.3, 126.0, 125.5, 125.1, 62.7, 61.1, 19.1, 13.4, 13.1. **HRMS** (ESI)  $m/z$ :  $[\text{M} + \text{H}]^+$  Calcd for  $\text{C}_{33}\text{H}_{28}\text{N}_2\text{O}_5$  533.2071; Found: 533.2076.

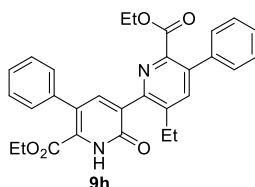

**Diethyl 3-Ethyl-2'-oxo-5,5'-diphenyl-1',2'-dihydro-[2,3'-bipyridine]-6,6'-dicarboxylate, 9h**; White solid (38.7 mg, 78% yield) 0.1 mmol scale reaction. Flash column chromatography conditions: hexane:ethyl acetate = 1:2. Mp 145-147 °C.  $^1\text{H}$  NMR (500 MHz,  $\text{CDCl}_3$ )  $\delta$  9.86 (br s, 1H), 7.73 (s, 1H), 7.71 (s, 1H), 7.44-7.36 (comp, 8H), 7.34-7.30 (comp, 2H), 4.20 (q,  $J = 7.1$ , 2H), 4.15 (q,  $J = 7.1$ , 2H), 2.83 (q,  $J = 7.1$  Hz, 2H), 1.26 (t,  $J = 7.1$  Hz, 3H), 1.05 (t,  $J = 7.1$  Hz, 3H), 1.01 (t,  $J = 7.1$  Hz, 3H).  $^{13}\text{C}$  NMR (126 MHz,  $\text{CDCl}_3$ )  $\delta$  167.0, 161.3, 159.6, 151.6, 146.7, 145.3, 140.9, 138.4, 138.3, 137.1, 137.0, 136.7, 136.7, 130.1, 129.0, 128.4, 128.3, 128.0, 127.9, 125.5, 62.7, 61.5, 25.1, 14.1, 13.6, 13.5. **HRMS** (ESI)  $m/z$ :  $[\text{M} + \text{H}]^+$  Calcd for  $\text{C}_{30}\text{H}_{28}\text{N}_2\text{O}_5$  497.2071; Found: 497.2070.

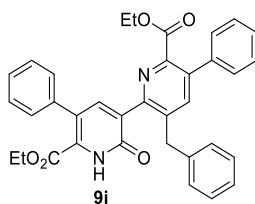

**Diethyl 3-Benzyl-2'-oxo-5,5'-diphenyl-1',2'-dihydro-[2,3'-bipyridine]-6,6'-dicarboxylate, 9i**; White solid (40.2 mg, 72% yield) 0.1 mmol scale reaction. Flash column chromatography conditions: hexane:ethyl acetate = 1:2. Mp 160-162 °C.  $^1\text{H}$  NMR (500 MHz,  $\text{CDCl}_3$ )  $\delta$  9.85 (br s, 1H), 7.62 (s, 1H), 7.49 (s, 1H), 7.46 – 7.31 (comp, 8H), 7.26 – 7.12 (comp, 5H), 7.07 (d,  $J = 7.3$  Hz, 2H), 4.23 (s, 2H), 4.19-4.15 (comp, 4H), 1.04-0.98 (comp, 6H).  $^{13}\text{C}$  NMR (126 MHz,  $\text{CDCl}_3$ )  $\delta$  167.0, 161.3, 159.6, 152.1, 147.2, 145.5, 139.9, 139.2, 138.7, 138.0, 136.9, 136.7, 136.5, 130.1,

129.1, 128.9, 128.5, 128.4, 128.3, 128.0, 127.9, 127.8, 126.4, 125.4, 62.7, 61.6, 38.6, 13.6, 13.4.  
**HRMS** (ESI) *m/z*: [M + H]<sup>+</sup> Calcd for C<sub>35</sub>H<sub>30</sub>N<sub>2</sub>O<sub>5</sub> 559.2227; Found: 559.2231.

## 6. 1 mmol scale reaction: Procedure for the synthesis of pyridineone compound **4a** from 1,2,3-triazine 1-oxide and ketoester

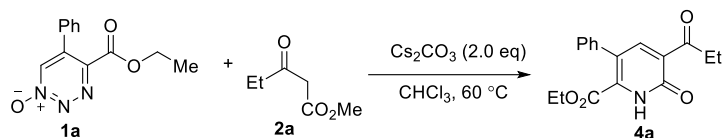

A chloroform solution (10.0 mL) of 1,2,3-triazine 1-oxide derivative **1a** (1.0 mmol, 1 equiv.) was added dropwise over 30 minutes to a 10.0 mL solution of CHCl<sub>3</sub> containing β-keto ester **2a** (1.5 mmol, 1.5 equiv.) and a Cs<sub>2</sub>CO<sub>3</sub> (20 mmol, 652 mg) at 60 °C. The reaction was continued for 1 h at same temperature. After completion of the reaction (monitored by TLC), the reaction mixture was cooled to room temperature and diluted with 50.0 mL of dichloromethane. The organic layer was washed with saturated ammonium chloride solution (50.0 mL) followed by water and brine solution, then dried over anhydrous MgSO<sub>4</sub>, filtered, and the solvent was evaporated under reduced pressure. Pure pyridone compound **4a** was obtained from DCM/hexane solvent (5:1) mixture by crystallization in 92% yield (275 mg).

## 7. Crystallographic data

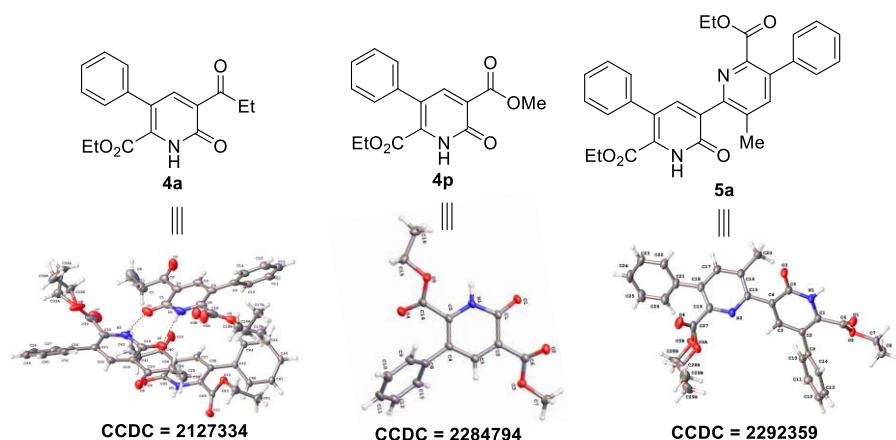

Single crystals of C<sub>17</sub>H<sub>17</sub>NO<sub>4</sub> (**4a**) were prepared by slow evaporation of a dichloromethane:hexane (1:10) solution. A suitable colorless plate-like crystal, with dimensions of 0.140 mm × 0.088 mm × 0.074 mm, was mounted in paratone oil onto a nylon loop. Single crystals of C<sub>16</sub>H<sub>15</sub>NO<sub>5</sub> (**4p**) were prepared by slow evaporation of a ethyl acetate:hexane (10:1) solution. A suitable colorless plate-like crystal of **4p**, with dimensions of 0.152 mm × 0.112 mm × 0.096 mm, was mounted in paratone oil onto a nylon loop. Single crystals of C<sub>29</sub>H<sub>26</sub>N<sub>2</sub>O<sub>5</sub> (**9a**) were prepared by slow evaporation of a dichloromethane:hexane (1:10) solution. A suitable colorless plate-like crystal, with dimensions of 0.152 mm × 0.112 mm × 0.096 mm, was mounted in paratone oil onto a nylon loop. All data were collected at 298(1) K and 298(1) K for compounds

**4a**, **4p** and **9a** respectively, using a XtaLAB Synergy/ Dualflex, HyPix fitted with CuK $\alpha$  radiation ( $\lambda = 1.54184$  Å). Data collection and unit cell refinement were performed using *CrysAlisPro* software.<sup>[1]</sup> The total number of data were measured in the  $6.2^\circ < 2\theta < 153.2^\circ$ ,  $6.6^\circ < 2\theta < 153.0^\circ$  and  $9^\circ < 2\theta < 152.2^\circ$  for compounds **4a**, **4p** and **9a** respectively, using  $\omega$  scans. Data processing and absorption correction, giving minimum and maximum transmission factors (0.653, 1.000 for compound (**4a**)/ 0.621, 1.00 for compound (**4p**)/ 0.487, 1.00 for compound (**9a**)) were accomplished with *CrysAlisPro*<sup>3</sup> and *SCALE3 ABSPACK*<sup>4</sup>, respectively. The structure, using Olex2<sup>5</sup>, was solved with the ShelXT<sup>6</sup> structure solution program using direct methods and refined (on  $F^2$ ) with the ShelXL<sup>7</sup> refinement package using full-matrix, least-squares techniques. All non-hydrogen atoms were refined with anisotropic displacement parameters. All hydrogen atom positions were determined by geometry and refined by a riding model.

| Compound number          | <b>4a</b>                                       | <b>4p</b>                                       | <b>9a</b>                                                     |
|--------------------------|-------------------------------------------------|-------------------------------------------------|---------------------------------------------------------------|
| Identification code      | Hpd462(1)                                       | Hpd614(2)                                       | Hpd750                                                        |
| Empirical formula        | C <sub>17</sub> H <sub>17</sub> NO <sub>4</sub> | C <sub>16</sub> H <sub>15</sub> NO <sub>5</sub> | C <sub>29</sub> H <sub>26</sub> N <sub>2</sub> O <sub>5</sub> |
| Formula weight           | 299.31                                          | 301.29                                          | 482.52                                                        |
| Crystal system           | Triclinic                                       | Monoclinic                                      | Monoclinic                                                    |
| Space group              | <i>P</i> - <i>I</i>                             | <i>P</i> 2 <sub>1</sub> / <i>n</i>              | <i>P</i> 2 <sub>1</sub> / <i>c</i>                            |
| <i>a</i> (Å)             | 12.5967(2)                                      | 15.6843(2)                                      | 13.83436(15)                                                  |
| <i>b</i> (Å)             | 12.8747(2)                                      | 6.33089(7)                                      | 11.10289(10)                                                  |
| <i>c</i> (Å)             | 15.6198(3)                                      | 15.8937(2)                                      | 20.5729(2)                                                    |
| $\alpha$ (°)             | 72.566(2)                                       | 90                                              | 90                                                            |
| $\beta$ (°)              | 69.811(1)                                       | 114.758(2)                                      | 109.0934(12)                                                  |
| $\gamma$ (°)             | 75.602(1)                                       | 90                                              | 90                                                            |
| Volume (Å <sup>3</sup> ) | 2238.30(7)                                      | 1433.11(3)                                      | 2986.18(6)                                                    |
| Z                        | 6                                               | 4                                               | 4                                                             |
| $\rho$ (calc.)           | 1.332                                           | 1.396                                           | 1.073                                                         |
| $\lambda$                | 1.54184                                         | 1.54184                                         | 1.54184                                                       |
| Temp. (K)                | 100.0(1)                                        | 298(1)                                          | 100(1)                                                        |

|                                                  |                           |                           |                           |
|--------------------------------------------------|---------------------------|---------------------------|---------------------------|
| F(000)                                           | 948                       | 632                       | 1016                      |
| $\mu$ (mm <sup>-1</sup> )                        | 0.785                     | 0.877                     | 0.601                     |
| T <sub>min</sub> , T <sub>max</sub>              | 0.653, 1.000              | 0.621, 1.000              | 0.487, 1.000              |
| 2 $\theta$ <sub>range</sub> (°)                  | 6.2 to 153.2              | 6.6, 153.0                | 6.76 to 152.8             |
| Reflections collected                            | 42637                     | 30584                     | 29239                     |
| Independent reflections                          | 9064<br>[R(int) = 0.0360] | 2921<br>[R(int) = 0.0329] | 5984<br>[R(int) = 0.0315] |
| Completeness                                     | 99.8%                     | 99.9%                     | 99.9%                     |
| Data / restraints / parameters                   | 9064 / 44 / 624           | 2921 / 0 / 204            | 5384 / 0 / 359            |
| Observed data<br>[I > 2 $\sigma$ (I)]            | 8008                      | 2657                      | 5338                      |
| $wR(F^2$ all data)                               | 0.1031                    | 0.0943                    | 0.1291                    |
| $R(F$ obsd data)                                 | 0.0430                    | 0.0351                    | 0.0443                    |
| Goodness-of-fit on $F^2$                         | 0.89                      | 1.06                      | 1.05                      |
| largest diff. peak and hole (e Å <sup>-3</sup> ) | 0.38 / -0.46              | 0.20 / -0.21              | 0.20 / -0.32              |

$$wR_2 = \{ \Sigma [w(F_o^2 - F_c^2)^2] / \Sigma [w(F_o^2)^2] \}^{1/2}$$

$$R_1 = \Sigma ||F_o| - |F_c|| / \Sigma |F_o|$$

## 8. Computational data

### Software

Quantum chemical calculations were performed using the Lonestar6 supercomputer at the Texas Advanced Computing Center (TACC) hosted by the University of Texas in Austin, Texas, and Bridges-2 supercomputer hosted by the Pittsburgh Supercomputing Center (PSC) and supported by Advanced Cyberinfrastructure Coordination Ecosystem: Services & Support (ACCESS) program. DFT geometry optimization, vibrational frequency, and IRC calculations were conducted using Gaussian 16 (rA.03).<sup>8</sup> The CREST utility of the xTB software suite<sup>9</sup> was used to locate initial starting geometries for optimization via DFT. Final images of minima and transition state structure geometries were rendered using CYLview (v1.0.600)<sup>10</sup> and VMD (v1.9.4a53).<sup>11</sup> Routine visualization and monitoring of calculations was performed with Chemcraft (v1.8-622b).<sup>12</sup>

### Details of Computational Methods

#### Gaussian 16 DFT calculations

Geometries of ground state minima and transition state structures were optimized without constraints using MN15 density functional approximation and the def2-TZVP basis set in dichloromethane solvent using the SMD solvation model. Calculations were set to “tight” convergence criteria with an ultrafine grid. Frequency calculations at the same level of theory were used to confirm the nature of the isolated stationary points. Geometries with zero imaginary frequencies were deemed minima whereas those with exactly one imaginary frequency along the chemical path of interest were deemed transition state structures. Intrinsic reaction coordinate (IRC) calculations were performed to further corroborate that the located transition state structures connected reactants to products. The quasi-harmonic approximation at 1M concentration was applied via GoodVibes<sup>13</sup> to all structures to correct for potential errors associated with low magnitude vibrational frequencies using a cut-off frequency of 50 cm<sup>-1</sup>. Single point corrections of the above geometries were calculated using PW6B95-D3(BJ) in dichloromethane solvent under the SMD solvation model. The def2-TZVPPD basis set was used by appending diffuse functions obtained from the EMSL BSE<sup>14</sup> to the G16-available def2-TZVPP basis set. This level of theory provided the final electronic component to the reported free energies.

#### Boltzmann Ensemble Averaging

To improve the accuracy of the DFT computational analysis of the reaction pathway, ensemble averaging was applied across the obtained structurally distinct conformers of each structure, as previously described.<sup>15</sup>

#### Diastereomeric Energy Diagrams

Cyclization transition state **TSB** resulted in cis and trans diastereomeric reaction pathways for structures **TSB**, **7**, and **7b**, with the pathways recombining at the final products, **8-E** and **8-K**. The metal-free pathway shows kinetic preference for trans configuration in the addition of the imine nitrogen to both the keto and the ester groups. The sodium- and cesium-mediated pathways show kinetic preference for cis configuration in the addition of the imine nitrogen to both the keto and ester groups. Energy difference between the most favorable and second most favorable transition states for each pathway (metal-free,  $\Delta\Delta G^\ddagger = 5.5$  kcal/mol; sodium-mediated,  $\Delta\Delta G^\ddagger = 3.2$  kcal/mol; cesium mediated,  $\Delta\Delta G^\ddagger = 3.3$  kcal/mol) suggest substantial kinetic preference for the lowest energy transition state over all other diastereomeric pathways.

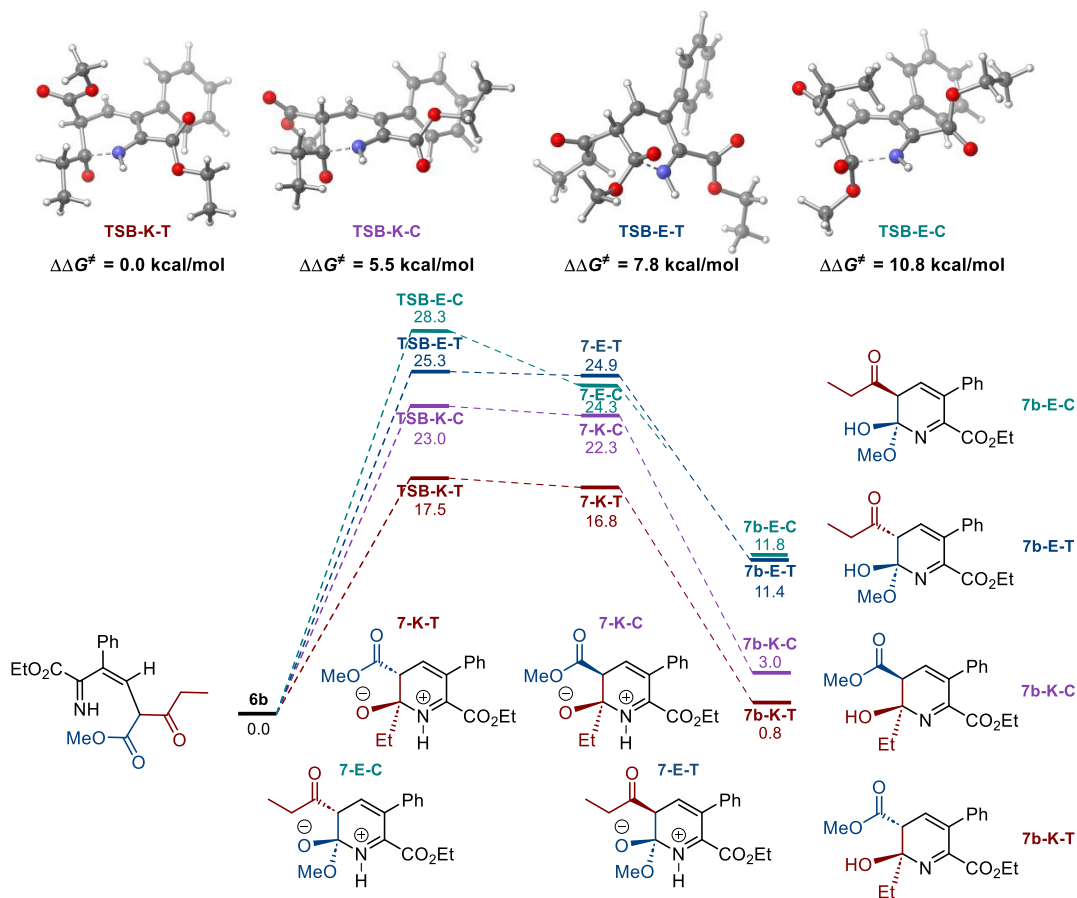

**Scheme S1.** Computed Gibbs free energy profile of metal ion-free cyclization pathways,  $\Delta G$ , kcal/mol.

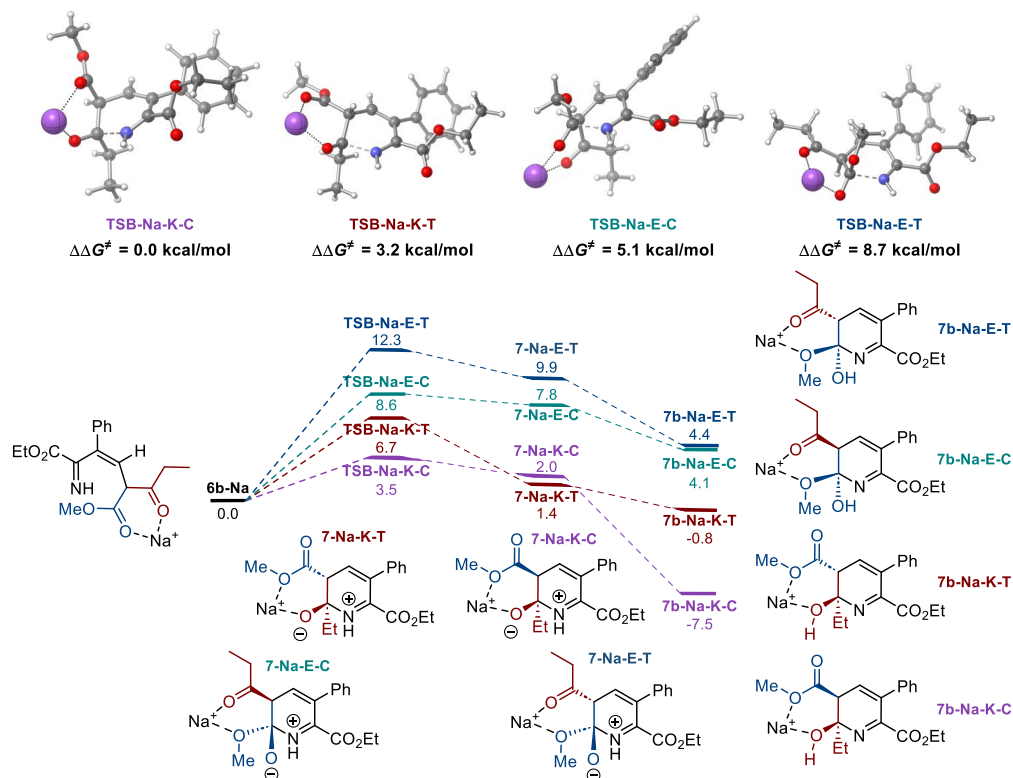

**Scheme S2.** Computed Gibbs free energy profile of the sodium-mediated cyclization pathways,  $\Delta G$ , kcal/mol.





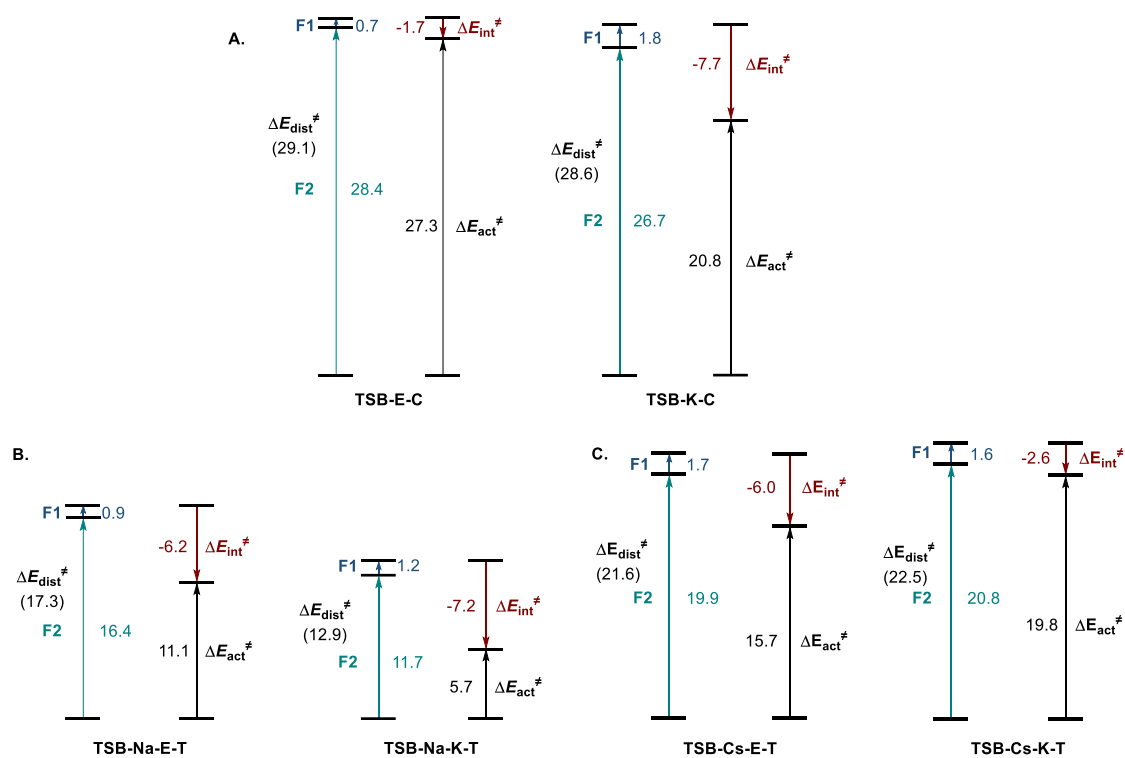

**Figure S2.** Distortion/Interaction analysis of the disfavored diastereomeric cyclization transition states. **A.** The cyclization process in the absence of metal ions (cis pathway). **B.** The sodium-mediated trans pathway. **C.** The cesium-mediated trans pathway.  $\Delta E$ , kcal/mol.

**Conformational Analysis and Tables of Thermodynamic Values by Structure –  
PW6B95(D3BJ) / def2-TZVPPD / SMD (DCM)**

5

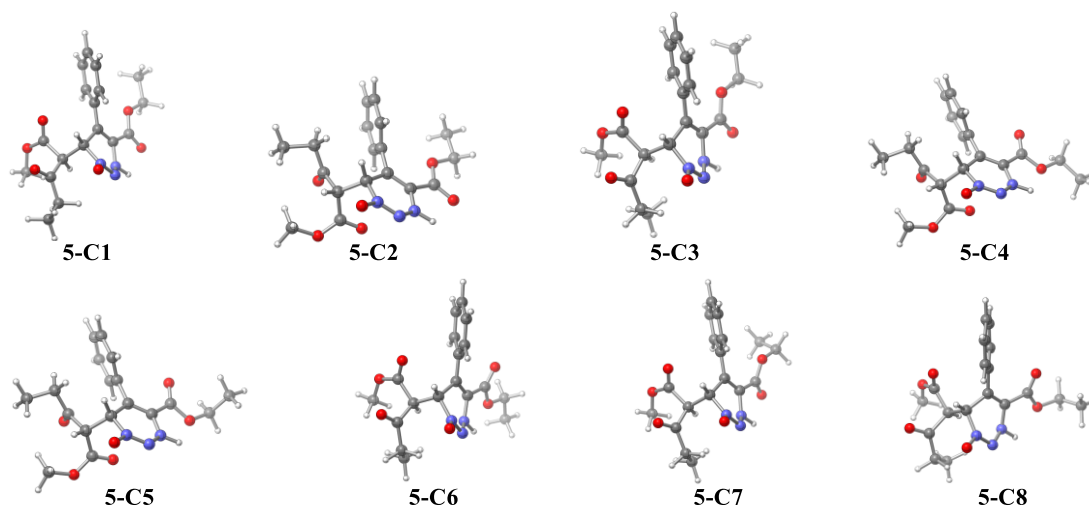

**Figure S3.** Conformers of addition intermediate **5**.

**Table S2.** Energies of conformers of addition intermediate **5**.<sup>a</sup>

| Structure   | $\Delta E$   | $\Delta H$   | $\Delta G$   | $\Delta G$ (GV50) | $\Delta\Delta G$ |
|-------------|--------------|--------------|--------------|-------------------|------------------|
| <b>5-C1</b> | -1316.242973 | -1315.833191 | -1315.918831 | -1315.915303      | 0.00             |
| <b>5-C2</b> | -1316.242367 | -1315.832843 | -1315.917799 | -1315.914949      | 0.22             |
| <b>5-C3</b> | -1316.240997 | -1315.831176 | -1315.916271 | -1315.912885      | 1.52             |
| <b>5-C4</b> | -1316.240446 | -1315.83067  | -1315.915392 | -1315.912628      | 1.68             |
| <b>5-C5</b> | -1316.23976  | -1315.829803 | -1315.914298 | -1315.911359      | 2.47             |
| <b>5-C6</b> | -1316.239083 | -1315.829015 | -1315.914742 | -1315.911135      | 2.62             |
| <b>5-C7</b> | -1316.240261 | -1315.830115 | -1315.914123 | -1315.9111        | 2.64             |
| <b>5-C8</b> | -1316.238423 | -1315.828428 | -1315.914413 | -1315.910414      | 3.07             |

<sup>a</sup>Energies were obtained as single points at the PW6B95(D3BJ) / def2-TZVPPD / SMD (DCM) level of theory based on structures optimized at the MN15 / def2-TZVP / SMD (DCM) level of theory.  $\Delta E$ ,  $\Delta H$ ,  $\Delta G$ , and  $\Delta G$  (GV50), hartree;  $\Delta\Delta G$ , kcal/mol.

## TSA

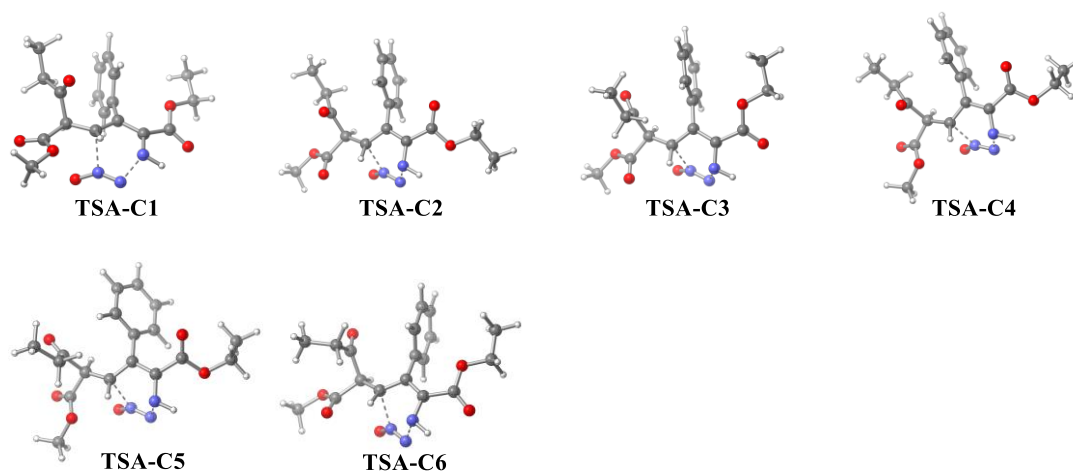

**Figure S4.** Conformers of N<sub>2</sub>O extrusion transition state **TSA**.

**Table S3.** Energies of conformers of N<sub>2</sub>O extrusion transition state **TSA**.<sup>a</sup>

| Structure     | $\Delta E$   | $\Delta H$   | $\Delta G$   | $\Delta G$ (GV50) | $\Delta\Delta G$ |
|---------------|--------------|--------------|--------------|-------------------|------------------|
| <b>TSA-C1</b> | -1316.199217 | -1315.794156 | -1315.880713 | -1315.878142      | 0.00             |
| <b>TSA-C2</b> | -1316.198488 | -1315.793513 | -1315.880669 | -1315.877761      | 0.24             |
| <b>TSA-C3</b> | -1316.19751  | -1315.792557 | -1315.88     | -1315.876821      | 0.83             |
| <b>TSA-C4</b> | -1316.196803 | -1315.791721 | -1315.879333 | -1315.875928      | 1.39             |
| <b>TSA-C5</b> | -1316.194997 | -1315.789916 | -1315.876806 | -1315.873672      | 2.80             |
| <b>TSA-C6</b> | -1316.194386 | -1315.789174 | -1315.876952 | -1315.873606      | 2.85             |

<sup>a</sup>Energies were obtained as single points at the PW6B95(D3BJ) / def2-TZVPPD / SMD (DCM) level of theory based on structures optimized at the MN15 / def2-TZVP / SMD (DCM) level of theory.  $\Delta E$ ,  $\Delta H$ ,  $\Delta G$ , and  $\Delta G$  (GV50), hartree;  $\Delta\Delta G$ , kcal/mol.

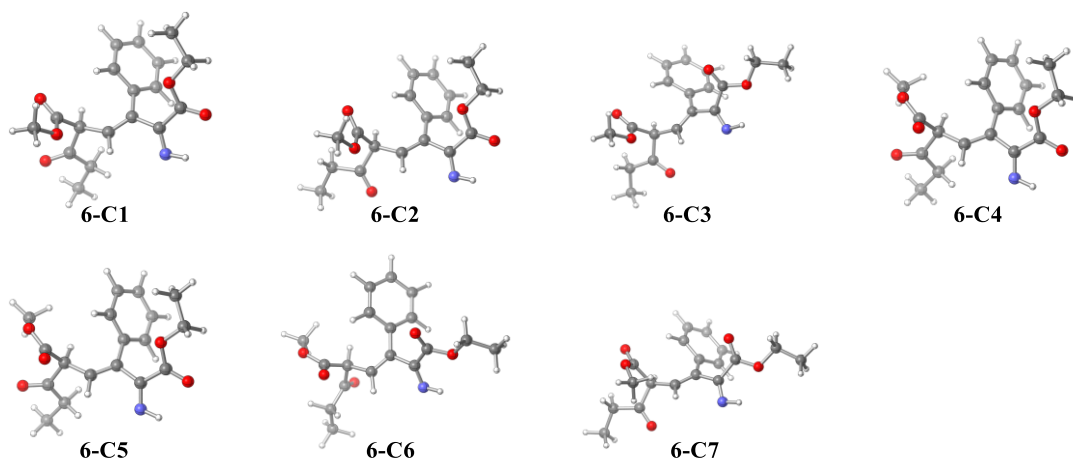

**Figure S5.** Conformers of extrusion intermediate **6**.

**Table S4.** Energies of conformers of extrusion intermediate **6**.<sup>a</sup>

| Structure   | $\Delta E$   | $\Delta H$   | $\Delta G$   | $\Delta G$ (GV50) | $\Delta\Delta G$ |
|-------------|--------------|--------------|--------------|-------------------|------------------|
| <b>6-C1</b> | -1131.318146 | -1130.927426 | -1131.012624 | -1131.008106      | 0.00             |
| <b>6-C2</b> | -1131.316676 | -1130.92589  | -1131.011364 | -1131.006838      | 0.80             |
| <b>6-C3</b> | -1131.315077 | -1130.924267 | -1131.009997 | -1131.005449      | 1.67             |
| <b>6-C4</b> | -1131.310984 | -1130.920123 | -1131.004303 | -1130.999982      | 5.10             |
| <b>6-C5</b> | -1131.309155 | -1130.918342 | -1131.002077 | -1130.998225      | 6.20             |
| <b>6-C6</b> | -1131.306818 | -1130.915871 | -1130.999743 | -1130.995827      | 7.71             |
| <b>6-C7</b> | -1131.30445  | -1130.913581 | -1130.997096 | -1130.993318      | 9.28             |

<sup>a</sup>Energies were obtained as single points at the PW6B95(D3BJ) / def2-TZVPPD / SMD (DCM) level of theory based on structures optimized at the MN15 / def2-TZVP / SMD (DCM) level of theory.  $\Delta E$ ,  $\Delta H$ ,  $\Delta G$ , and  $\Delta G$  (GV50), hartree;  $\Delta\Delta G$ , kcal/mol.

6b

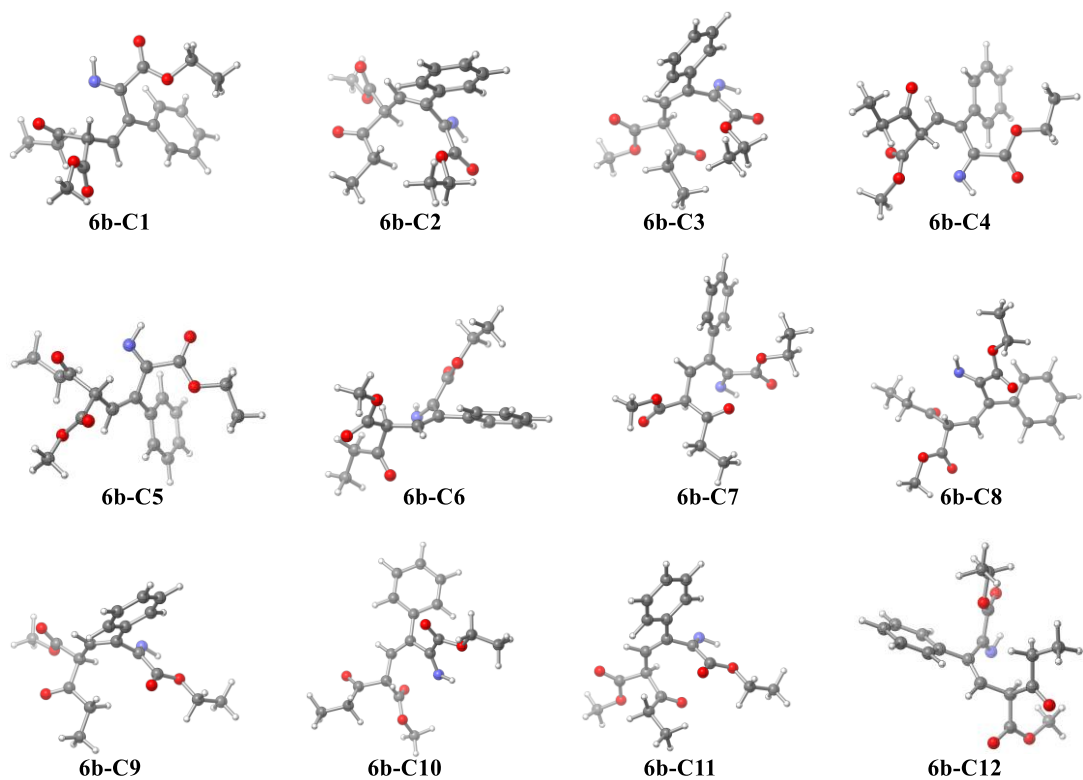

**Figure S6.** Conformers of isomerized intermediate **6b**.

**Table S5.** Energies of conformers of isomerized intermediate **6b**. <sup>a</sup>

| Structure     | $\Delta E$   | $\Delta H$   | $\Delta G$   | $\Delta G$ (GV50) | $\Delta\Delta G$ |
|---------------|--------------|--------------|--------------|-------------------|------------------|
| <b>6b-C1</b>  | -1131.318958 | -1130.928391 | -1131.012545 | -1131.0086        | 0.00             |
| <b>6b-C2</b>  | -1131.319154 | -1130.928385 | -1131.011964 | -1131.008373      | 0.14             |
| <b>6b-C3</b>  | -1131.318089 | -1130.927608 | -1131.011613 | -1131.007463      | 0.71             |
| <b>6b-C4</b>  | -1131.318157 | -1130.927512 | -1131.01067  | -1131.007352      | 0.78             |
| <b>6b-C5</b>  | -1131.317976 | -1130.927188 | -1131.010913 | -1131.0072        | 0.88             |
| <b>6b-C6</b>  | -1131.317632 | -1130.926819 | -1131.010577 | -1131.006855      | 1.10             |
| <b>6b-C7</b>  | -1131.31655  | -1130.926088 | -1131.010651 | -1131.006476      | 1.33             |
| <b>6b-C8</b>  | -1131.316878 | -1130.926017 | -1131.010281 | -1131.00635       | 1.41             |
| <b>6b-C9</b>  | -1131.316688 | -1130.925877 | -1131.00989  | -1131.006274      | 1.46             |
| <b>6b-C10</b> | -1131.316339 | -1130.925536 | -1131.010182 | -1131.006098      | 1.57             |
| <b>6b-C11</b> | -1131.315391 | -1130.924678 | -1131.008922 | -1131.004985      | 2.27             |
| <b>6b-C12</b> | -1131.311704 | -1130.9208   | -1131.00364  | -1131.000063      | 5.36             |

<sup>a</sup>Energies were obtained as single points at the PW6B95(D3BJ) / def2-TZVPPD / SMD (DCM) level of theory based on structures optimized at the MN15 / def2-TZVP / SMD (DCM) level of theory.  $\Delta E$ ,  $\Delta H$ ,  $\Delta G$ , and  $\Delta G$  (GV50), hartree;  $\Delta\Delta G$ , kcal/mol.

### 6b-Cs

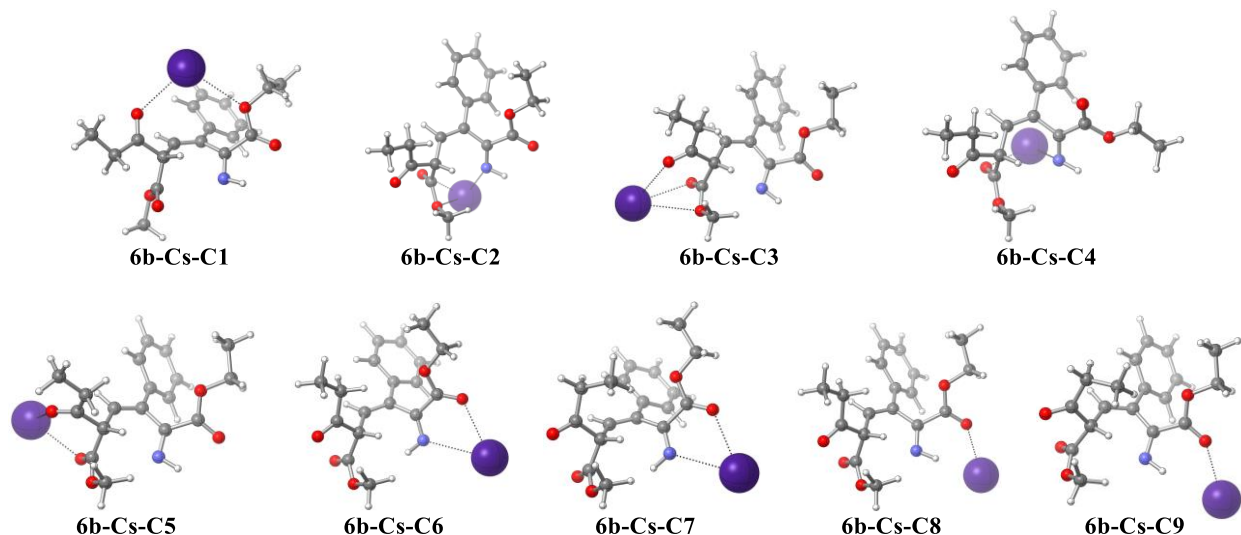

**Figure S7.** Conformers of cesium-coordinated isomerized intermediate **6b-Cs**.

**Table S6.** Energies of conformers of cesium-coordinated isomerized intermediate **6b-Cs**. <sup>a</sup>

| Structure       | $\Delta E$   | $\Delta H$   | $\Delta G$   | $\Delta G$ (GV50) | $\Delta\Delta G$ |
|-----------------|--------------|--------------|--------------|-------------------|------------------|
| <b>6b-Cs-C1</b> | -1151.417318 | -1151.023362 | -1151.112575 | -1151.108624      | 0.00             |
| <b>6b-Cs-C2</b> | -1151.413913 | -1151.019832 | -1151.109166 | -1151.10531       | 2.08             |
| <b>6b-Cs-C3</b> | -1151.413084 | -1151.019122 | -1151.10913  | -1151.104901      | 2.34             |
| <b>6b-Cs-C4</b> | -1151.412111 | -1151.018228 | -1151.108677 | -1151.104181      | 2.79             |
| <b>6b-Cs-C5</b> | -1151.41269  | -1151.018355 | -1151.108971 | -1151.104054      | 2.87             |
| <b>6b-Cs-C6</b> | -1151.409636 | -1151.015048 | -1151.105093 | -1151.100573      | 5.05             |
| <b>6b-Cs-C7</b> | -1151.408912 | -1151.01428  | -1151.10385  | -1151.099553      | 5.69             |
| <b>6b-Cs-C8</b> | -1151.406531 | -1151.012377 | -1151.102211 | -1151.097999      | 6.67             |
| <b>6b-Cs-C9</b> | -1151.405714 | -1151.011444 | -1151.102591 | -1151.097247      | 7.14             |

<sup>a</sup>Energies were obtained as single points at the PW6B95(D3BJ) / def2-TZVPPD / SMD (DCM) level of theory based on structures optimized at the MN15 / def2-TZVP / SMD (DCM) level of theory.  $\Delta E$ ,  $\Delta H$ ,  $\Delta G$ , and  $\Delta G$  (GV50), hartree;  $\Delta\Delta G$ , kcal/mol.

## 6b-Na

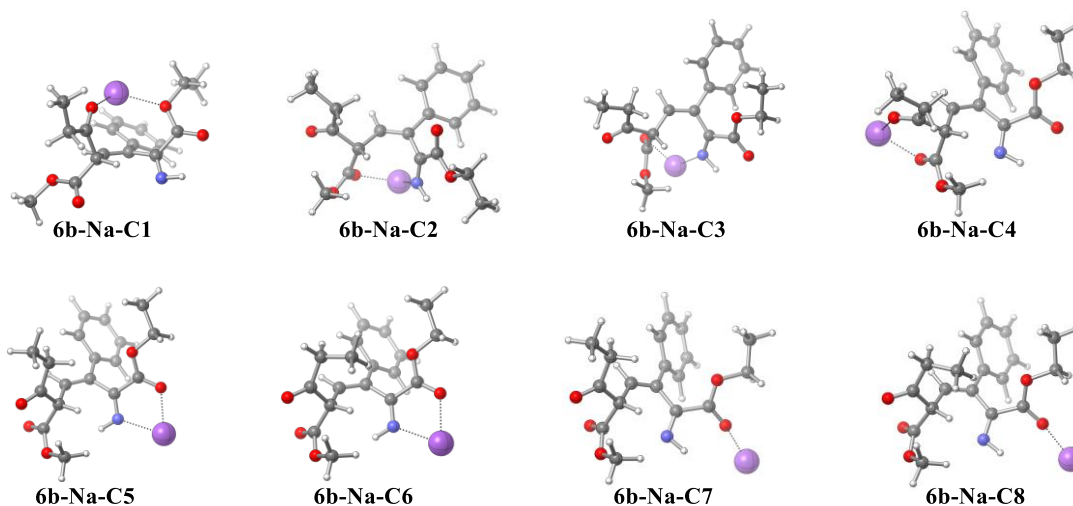

**Figure S8.** Conformers of sodium-coordinated isomerized intermediate **6b-Na**.

**Table S7.** Energies of conformers of sodium-coordinated isomerized intermediate **6b-Na**.<sup>a</sup>

| Structure       | $\Delta E$   | $\Delta H$   | $\Delta G$   | $\Delta G$ (GV50) | $\Delta\Delta G$ |
|-----------------|--------------|--------------|--------------|-------------------|------------------|
| <b>6b-Na-C1</b> | -1293.708364 | -1293.31402  | -1293.399133 | -1293.396588      | 0.00             |
| <b>6b-Na-C2</b> | -1293.704391 | -1293.309956 | -1293.397078 | -1293.393529      | 1.92             |
| <b>6b-Na-C3</b> | -1293.703664 | -1293.309525 | -1293.396133 | -1293.392842      | 2.35             |
| <b>6b-Na-C4</b> | -1293.70428  | -1293.309604 | -1293.395373 | -1293.392165      | 2.78             |
| <b>6b-Na-C5</b> | -1293.702677 | -1293.307711 | -1293.394156 | -1293.390357      | 3.91             |
| <b>6b-Na-C6</b> | -1293.702336 | -1293.30707  | -1293.392202 | -1293.389118      | 4.69             |
| <b>6b-Na-C7</b> | -1293.686625 | -1293.292733 | -1293.381195 | -1293.377066      | 12.25            |
| <b>6b-Na-C8</b> | -1293.686112 | -1293.291793 | -1293.379874 | -1293.375435      | 13.27            |

<sup>a</sup>Energies were obtained as single points at the PW6B95(D3BJ) / def2-TZVPPD / SMD (DCM) level of theory based on structures optimized at the MN15 / def2-TZVP / SMD (DCM) level of theory.  $\Delta E$ ,  $\Delta H$ ,  $\Delta G$ , and  $\Delta G$  (GV50), hartree;  $\Delta\Delta G$ , kcal/mol.

## TSB-E-T

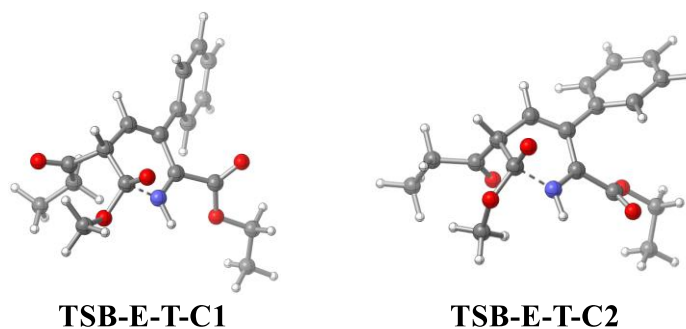

**Figure S9.** Conformers of ester cyclization trans transition state **TSB-E-T**.

**Table S8.** Energies of conformers of ester cyclization trans transition state **TSB-E-T**.<sup>a</sup>

| Structure         | $\Delta E$   | $\Delta H$   | $\Delta G$   | $\Delta G$ (GV50) | $\Delta\Delta G$ |
|-------------------|--------------|--------------|--------------|-------------------|------------------|
| <b>TSB-E-T-C1</b> | -1131.279933 | -1130.891491 | -1130.972814 | -1130.969288      | 0.00             |
| <b>TSB-E-T-C2</b> | -1131.276121 | -1130.887405 | -1130.965681 | -1130.962761      | 4.10             |

<sup>a</sup>Energies were obtained as single points at the PW6B95(D3BJ) / def2-TZVPPD / SMD (DCM) level of theory based on structures optimized at the MN15 / def2-TZVP / SMD (DCM) level of theory.  $\Delta E$ ,  $\Delta H$ ,  $\Delta G$ , and  $\Delta G$  (GV50), hartree;  $\Delta\Delta G$ , kcal/mol.

## TSB-E-C

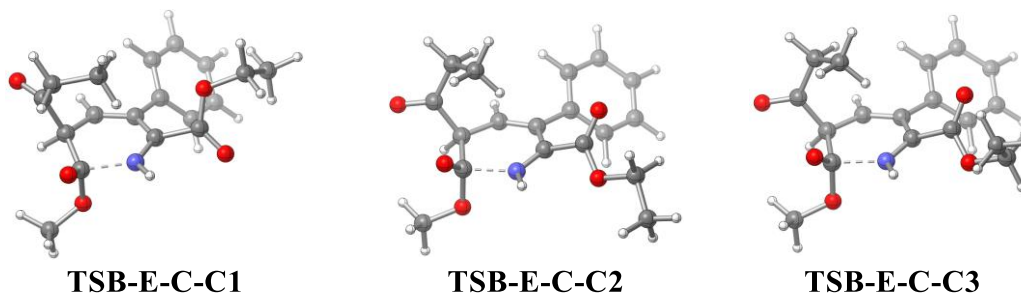

**Figure S10.** Conformers of ester cyclization cis transition state **TSB-E-C**.

**Table S9.** Energies of conformers of ester cyclization cis transition state **TSB-E-C**.<sup>a</sup>

| Structure         | $\Delta E$   | $\Delta H$   | $\Delta G$   | $\Delta G$ (GV50) | $\Delta\Delta G$ |
|-------------------|--------------|--------------|--------------|-------------------|------------------|
| <b>TSB-E-C-C1</b> | -1131.273262 | -1130.884655 | -1130.96559  | -1130.961959      | 0.00             |
| <b>TSB-E-C-C2</b> | -1131.273182 | -1130.884249 | -1130.964461 | -1130.961458      | 0.31             |
| <b>TSB-E-C-C3</b> | -1131.272725 | -1130.883765 | -1130.963504 | -1130.960582      | 0.86             |



<sup>a</sup>Energies were obtained as single points at the PW6B95(D3BJ) / def2-TZVPPD / SMD (DCM) level of theory based on structures optimized at the MN15 / def2-TZVP / SMD (DCM) level of theory.  $\Delta E$ ,  $\Delta H$ ,  $\Delta G$ , and  $\Delta G$  (GV50), hartree;  $\Delta\Delta G$ , kcal/mol.

### TSB-K-T

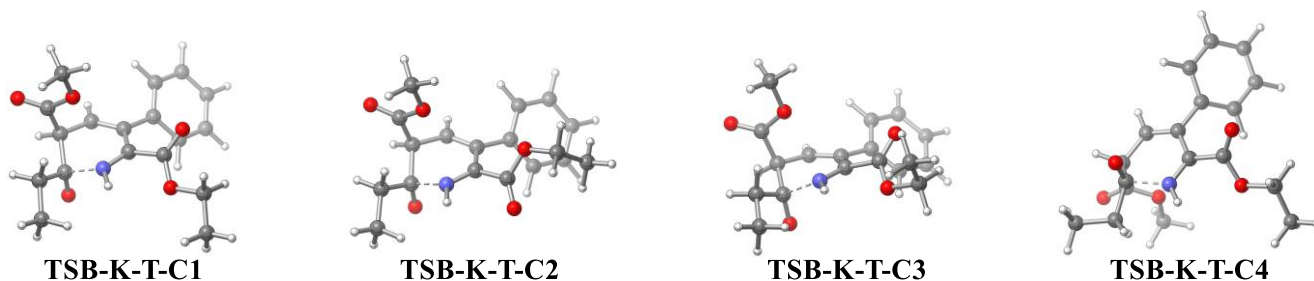

**Figure S11.** Conformers of ketone cyclization trans transition state **TSB-K-T**.

**Table S10.** Energies of conformers of ketone cyclization trans transition state **TSB-K-T**.<sup>a</sup>

| Structure         | $\Delta E$   | $\Delta H$   | $\Delta G$   | $\Delta G$ (GV50) | $\Delta\Delta G$ |
|-------------------|--------------|--------------|--------------|-------------------|------------------|
| <b>TSB-K-T-C1</b> | -1131.292553 | -1130.903029 | -1130.981893 | -1130.979408      | 0.00             |
| <b>TSB-K-T-C2</b> | -1131.292844 | -1130.903409 | -1130.981448 | -1130.979066      | 0.21             |
| <b>TSB-K-T-C3</b> | -1131.292053 | -1130.90243  | -1130.98105  | -1130.978576      | 0.52             |
| <b>TSB-K-T-C4</b> | -1131.290316 | -1130.900729 | -1130.979539 | -1130.976878      | 1.59             |

<sup>a</sup>Energies were obtained as single points at the PW6B95(D3BJ) / def2-TZVPPD / SMD (DCM) level of theory based on structures optimized at the MN15 / def2-TZVP / SMD (DCM) level of theory.  $\Delta E$ ,  $\Delta H$ ,  $\Delta G$ , and  $\Delta G$  (GV50), hartree;  $\Delta\Delta G$ , kcal/mol.

## TSB-K-C

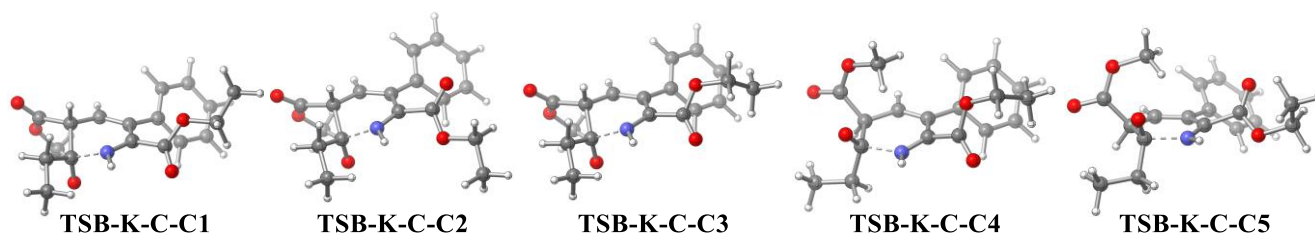

**Figure S12.** Conformers of ketone cyclization cis transition state **TSB-K-C**.

**Table S11.** Energies of conformers of ketone cyclization cis transition state **TSB-K-C**.<sup>a</sup>

| Structure  | $\Delta E$   | $\Delta H$   | $\Delta G$   | $\Delta G$ (GV50) | $\Delta\Delta G$ |
|------------|--------------|--------------|--------------|-------------------|------------------|
| TSB-K-C-C1 | -1131.286239 | -1130.897009 | -1130.975863 | -1130.973218      | 0.00             |
| TSB-K-C-C2 | -1131.285099 | -1130.895775 | -1130.974477 | -1130.971894      | 0.83             |
| TSB-K-C-C3 | -1131.2855   | -1130.896156 | -1130.974216 | -1130.971655      | 0.98             |
| TSB-K-C-C4 | -1131.280099 | -1130.890806 | -1130.968652 | -1130.966269      | 4.36             |
| TSB-K-C-C5 | -1131.279246 | -1130.889622 | -1130.967568 | -1130.9651        | 5.09             |

<sup>a</sup>Energies were obtained as single points at the PW6B95(D3BJ) / def2-TZVPPD / SMD (DCM) level of theory based on structures optimized at the MN15 / def2-TZVP / SMD (DCM) level of theory.  $\Delta E$ ,  $\Delta H$ ,  $\Delta G$ , and  $\Delta G$  (GV50), hartree;  $\Delta\Delta G$ , kcal/mol.

## TSB-Cs-E-T

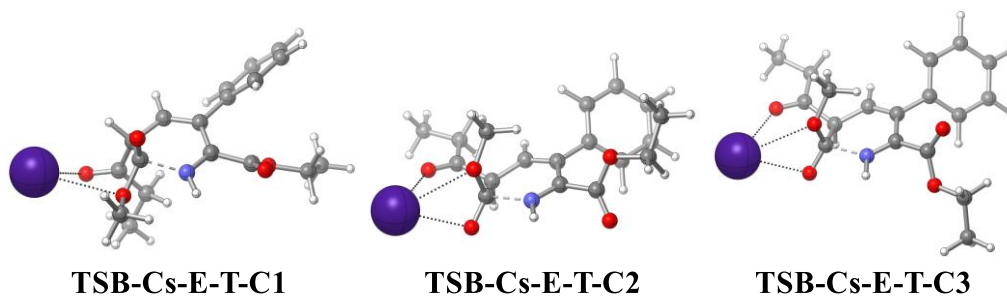

**Figure S13.** Conformers of cesium-coordinated ester cyclization trans transition state **TSB-Cs-E-T**.

**Table S12.** Energies of conformers of cesium-coordinated ester cyclization trans transition state **TSB-Cs-E-T**.<sup>a</sup>

| Structure     | $\Delta E$   | $\Delta H$   | $\Delta G$   | $\Delta G$ (GV50) | $\Delta\Delta G$ |
|---------------|--------------|--------------|--------------|-------------------|------------------|
| TSB-Cs-E-T-C1 | -1151.387739 | -1150.995819 | -1151.081755 | -1151.078507      | 0.00             |

|                      |              |              |              |              |      |
|----------------------|--------------|--------------|--------------|--------------|------|
| <b>TSB-Cs-E-T-C2</b> | -1151.385208 | -1150.993566 | -1151.078861 | -1151.075213 | 2.07 |
| <b>TSB-Cs-E-T-C3</b> | -1151.384459 | -1150.992772 | -1151.077911 | -1151.074508 | 2.51 |

<sup>a</sup>Energies were obtained as single points at the PW6B95(D3BJ) / def2-TZVPPD / SMD (DCM) level of theory based on structures optimized at the MN15 / def2-TZVP / SMD (DCM) level of theory.  $\Delta E$ ,  $\Delta H$ ,  $\Delta G$ , and  $\Delta G$  (GV50), hartree;  $\Delta\Delta G$ , kcal/mol.

#### TSB-Cs-E-C

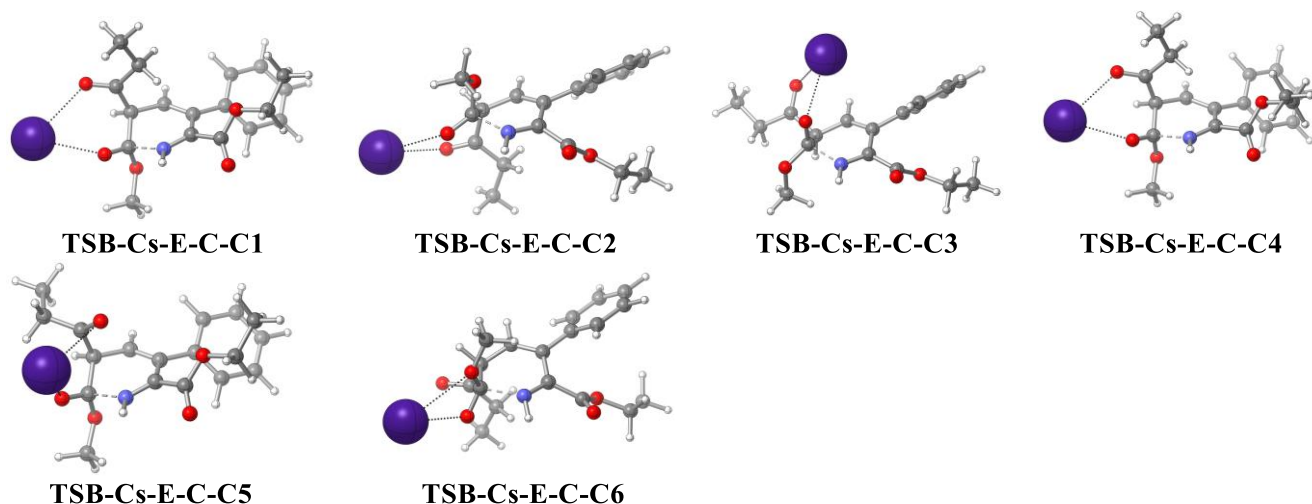

**Figure S14.** Conformers of cesium-coordinated ester cyclization cis transition state **TSB-Cs-E-C**.

**Table S13.** Energies of conformers of cesium-coordinated ester cyclization cis transition state **TSB-Cs-E-C**. <sup>a</sup>

| Structure            | $\Delta E$   | $\Delta H$   | $\Delta G$   | $\Delta G$ (GV50) | $\Delta\Delta G$ |
|----------------------|--------------|--------------|--------------|-------------------|------------------|
| <b>TSB-Cs-E-C-C1</b> | -1151.391698 | -1151.000171 | -1151.088019 | -1151.083789      | 0.00             |
| <b>TSB-Cs-E-C-C2</b> | -1151.391724 | -1151.000243 | -1151.086938 | -1151.083121      | 0.42             |
| <b>TSB-Cs-E-C-C3</b> | -1151.392381 | -1151.000711 | -1151.086222 | -1151.082758      | 0.65             |
| <b>TSB-Cs-E-C-C4</b> | -1151.39051  | -1150.99878  | -1151.086447 | -1151.082228      | 0.98             |
| <b>TSB-Cs-E-C-C5</b> | -1151.389591 | -1150.997665 | -1151.084742 | -1151.081116      | 1.68             |
| <b>TSB-Cs-E-C-C6</b> | -1151.387921 | -1150.99624  | -1151.084619 | -1151.079629      | 2.61             |

<sup>a</sup>Energies were obtained as single points at the PW6B95(D3BJ) / def2-TZVPPD / SMD (DCM) level of theory based on structures optimized at the MN15 / def2-TZVP / SMD (DCM) level of theory.  $\Delta E$ ,  $\Delta H$ ,  $\Delta G$ , and  $\Delta G$  (GV50), hartree;  $\Delta\Delta G$ , kcal/mol.

## TSB-Cs-K-T

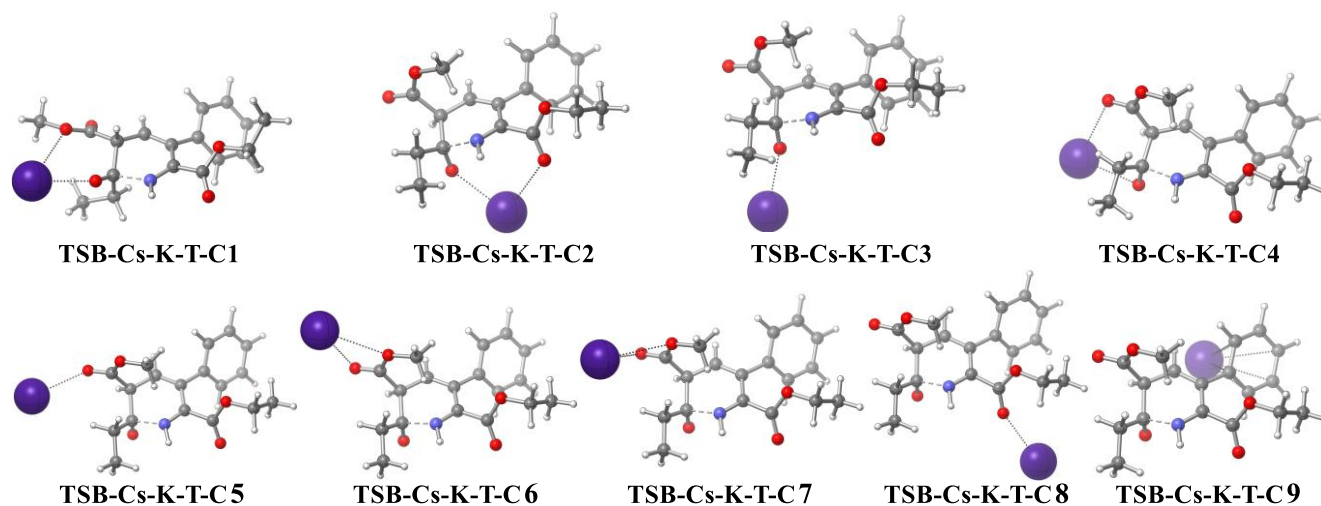

**Figure S15.** Conformers of cesium-coordinated ketone cyclization trans transition state **TSB-Cs-K-T**.

**Table S14.** Energies of conformers of cesium-coordinated ketone cyclization trans transition state **TSB-Cs-K-T**.<sup>a</sup>

| Structure     | $\Delta E$   | $\Delta H$   | $\Delta G$   | $\Delta G$ (GV50) | $\Delta\Delta G$ |
|---------------|--------------|--------------|--------------|-------------------|------------------|
| TSB-Cs-K-T-C1 | -1151.398956 | -1151.00674  | -1151.09289  | -1151.089481      | 0.00             |
| TSB-Cs-K-T-C2 | -1151.382226 | -1150.98941  | -1151.074884 | -1151.071333      | 11.39            |
| TSB-Cs-K-T-C3 | -1151.381473 | -1150.988697 | -1151.075356 | -1151.071226      | 11.46            |
| TSB-Cs-K-T-C4 | -1151.379695 | -1150.986665 | -1151.072798 | -1151.069043      | 12.83            |
| TSB-Cs-K-T-C5 | -1151.376443 | -1150.983668 | -1151.070114 | -1151.066033      | 14.71            |
| TSB-Cs-K-T-C6 | -1151.375989 | -1150.983253 | -1151.069218 | -1151.065563      | 15.01            |
| TSB-Cs-K-T-C7 | -1151.376068 | -1150.983208 | -1151.067824 | -1151.064618      | 15.60            |
| TSB-Cs-K-T-C8 | -1151.373221 | -1150.980386 | -1151.0651   | -1151.061769      | 17.39            |
| TSB-Cs-K-T-C9 | -1151.373216 | -1150.980227 | -1151.063851 | -1151.06134       | 17.66            |

<sup>a</sup>Energies were obtained as single points at the PW6B95(D3BJ) / def2-TZVPPD / SMD (DCM) level of theory based on structures optimized at the MN15 / def2-TZVP / SMD (DCM) level of theory.  $\Delta E$ ,  $\Delta H$ ,  $\Delta G$ , and  $\Delta G$  (GV50), hartree;  $\Delta\Delta G$ , kcal/mol.

### TSB-Cs-K-C

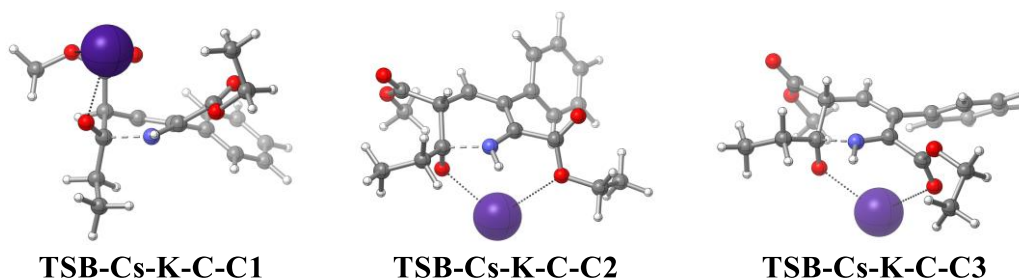

**Figure S16.** Conformers of cesium-coordinated ketone cyclization cis transition state **TSB-Cs-K-C**.

**Table S15.** Energies of conformers of cesium-coordinated ketone cyclization cis transition state **TSB-Cs-K-C**.<sup>a</sup>

| Structure     | $\Delta E$   | $\Delta H$   | $\Delta G$   | $\Delta G$ (GV50) | $\Delta\Delta G$ |
|---------------|--------------|--------------|--------------|-------------------|------------------|
| TSB-Cs-K-C-C1 | -1151.3932   | -1151.000009 | -1151.083425 | -1151.080735      | 0.00             |
| TSB-Cs-K-C-C2 | -1151.385587 | -1150.99305  | -1151.078693 | -1151.075312      | 3.40             |
| TSB-Cs-K-C-C3 | -1151.385812 | -1150.992722 | -1151.076855 | -1151.074354      | 4.00             |

<sup>a</sup>Energies were obtained as single points at the PW6B95(D3BJ) / def2-TZVPPD / SMD (DCM) level of theory based on structures optimized at the MN15 / def2-TZVP / SMD (DCM) level of theory.  $\Delta E$ ,  $\Delta H$ ,  $\Delta G$ , and  $\Delta G$  (GV50), hartree;  $\Delta\Delta G$ , kcal/mol.

### TSB-Na-E-T

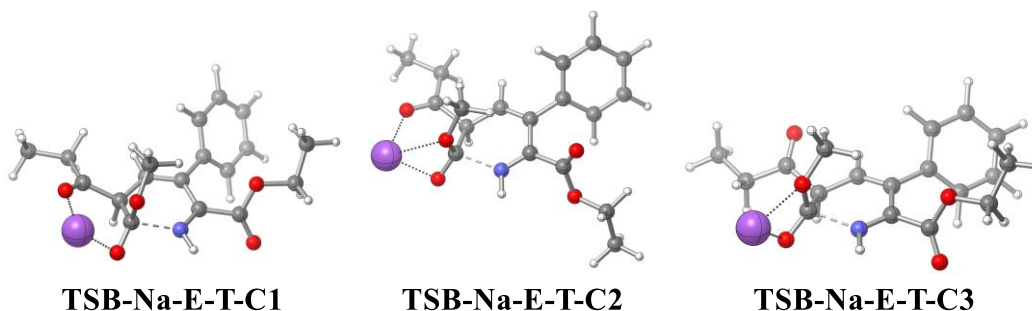

**Figure S17.** Conformers of sodium-coordinated ester cyclization trans transition state **TSB-Na-E-T**.

**Table S16.** Energies of conformers of sodium-coordinated ester cyclization trans transition state **TSB-Na-E-T**.<sup>a</sup>

| Structure | $\Delta E$ | $\Delta H$ | $\Delta G$ | $\Delta G$ (GV50) | $\Delta\Delta G$ |
|-----------|------------|------------|------------|-------------------|------------------|
|-----------|------------|------------|------------|-------------------|------------------|

|                      |              |              |              |              |       |
|----------------------|--------------|--------------|--------------|--------------|-------|
| <b>TSB-Na-E-T-C1</b> | -1293.68462  | -1293.292346 | -1293.374027 | -1293.371183 | 0.000 |
| <b>TSB-Na-E-T-C2</b> | -1293.684077 | -1293.291849 | -1293.373488 | -1293.370828 | 0.222 |
| <b>TSB-Na-E-T-C3</b> | -1293.676163 | -1293.284265 | -1293.367953 | -1293.364818 | 3.994 |

<sup>a</sup>Energies were obtained as single points at the PW6B95(D3BJ) / def2-TZVPPD / SMD (DCM) level of theory based on structures optimized at the MN15 / def2-TZVP / SMD (DCM) level of theory.  $\Delta E$ ,  $\Delta H$ ,  $\Delta G$ , and  $\Delta G$  (GV50), hartree;  $\Delta\Delta G$ , kcal/mol.

### TSB-Na-E-C

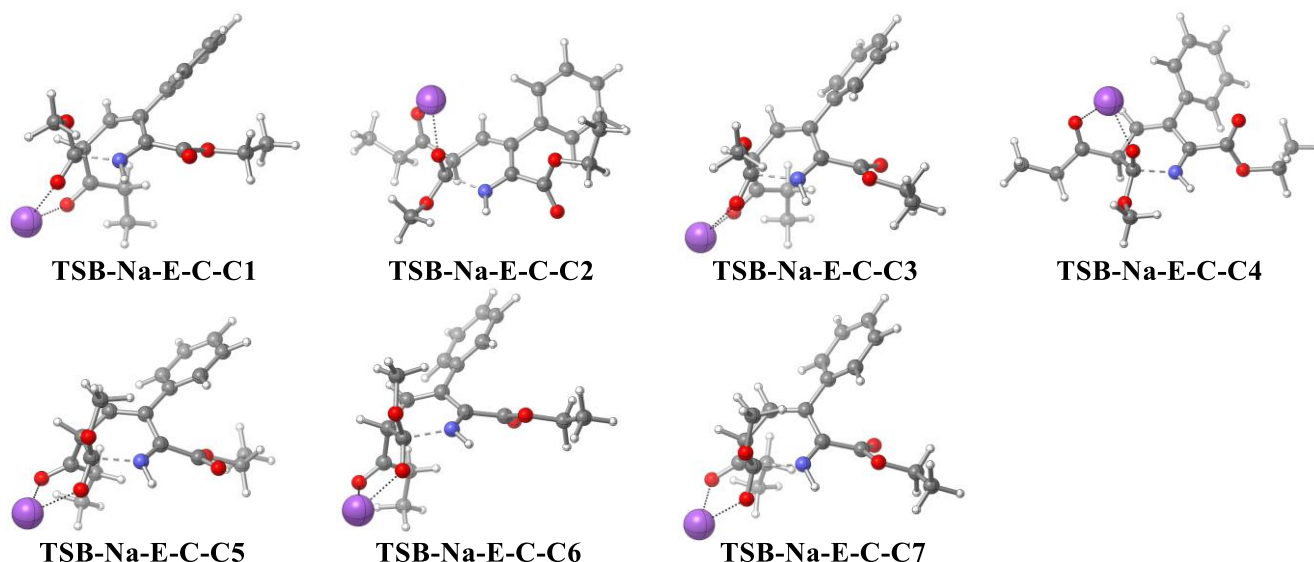

**Figure S18.** Conformers of sodium-coordinated ester cyclization cis transition state **TSB-Na-E-C**.

**Table S17.** Energies of conformers of sodium-coordinated ester cyclization cis transition state **TSB-Na-E-C**.<sup>a</sup>

| Structure            | $\Delta E$   | $\Delta H$   | $\Delta G$   | $\Delta G$ (GV50) | $\Delta\Delta G$ |
|----------------------|--------------|--------------|--------------|-------------------|------------------|
| <b>TSB-Na-E-C-C1</b> | -1293.690002 | -1293.29828  | -1293.382565 | -1293.378835      | 0.00             |
| <b>TSB-Na-E-C-C2</b> | -1293.688877 | -1293.296999 | -1293.38188  | -1293.378059      | 0.49             |
| <b>TSB-Na-E-C-C3</b> | -1293.688891 | -1293.296945 | -1293.381539 | -1293.378026      | 0.51             |
| <b>TSB-Na-E-C-C4</b> | -1293.688349 | -1293.296011 | -1293.379802 | -1293.376652      | 1.37             |
| <b>TSB-Na-E-C-C5</b> | -1293.683539 | -1293.29155  | -1293.37443  | -1293.371119      | 4.84             |

|                      |              |              |              |             |      |
|----------------------|--------------|--------------|--------------|-------------|------|
| <b>TSB-Na-E-C-C6</b> | -1293.682551 | -1293.29057  | -1293.374349 | -1293.37067 | 5.12 |
| <b>TSB-Na-E-C-C7</b> | -1293.682682 | -1293.290246 | -1293.372822 | -1293.36958 | 5.81 |

<sup>a</sup>Energies were obtained as single points at the PW6B95(D3BJ) / def2-TZVPPD / SMD (DCM) level of theory based on structures optimized at the MN15 / def2-TZVP / SMD (DCM) level of theory.  $\Delta E$ ,  $\Delta H$ ,  $\Delta G$ , and  $\Delta G$  (GV50), hartree;  $\Delta\Delta G$ , kcal/mol.

### TSB-Na-K-T

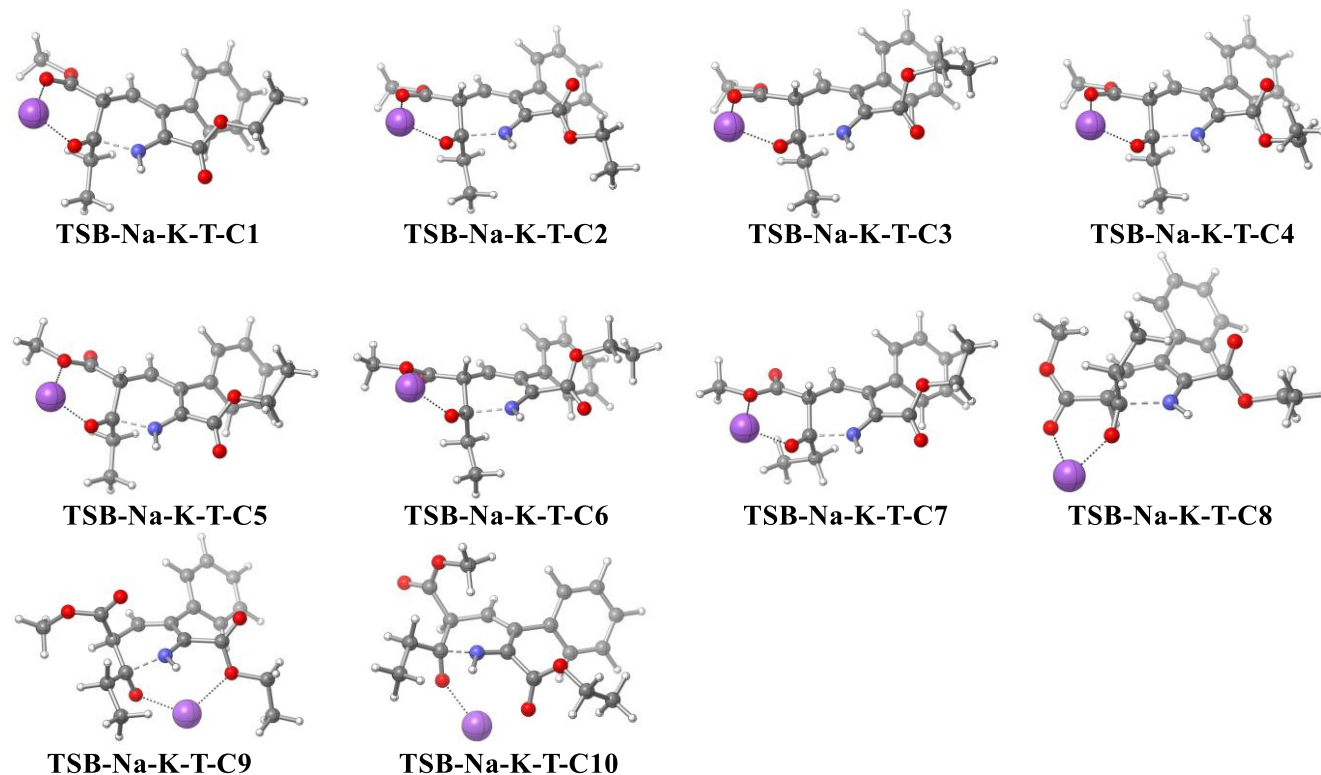

**Figure S19.** Conformers of sodium-coordinated ketone cyclization trans transition state **TSB-Na-K-T**.

**Table S18.** Energies of conformers of sodium-coordinated ketone cyclization trans transition state **TSB-Na-K-T**.<sup>a</sup>

| Structure            | $\Delta E$   | $\Delta H$   | $\Delta G$   | $\Delta G$ (GV50) | $\Delta\Delta G$ |
|----------------------|--------------|--------------|--------------|-------------------|------------------|
| <b>TSB-Na-K-T-C1</b> | -1293.700428 | -1293.307574 | -1293.390604 | -1293.38811       | 0.00             |
| <b>TSB-Na-K-T-C2</b> | -1293.699101 | -1293.306369 | -1293.39101  | -1293.387474      | 0.40             |
| <b>TSB-Na-K-T-C3</b> | -1293.699767 | -1293.306802 | -1293.389036 | -1293.386596      | 0.95             |
| <b>TSB-Na-K-T-C4</b> | -1293.698636 | -1293.305451 | -1293.388818 | -1293.38578       | 1.46             |



|                       |              |              |              |              |       |
|-----------------------|--------------|--------------|--------------|--------------|-------|
| <b>TSB-Na-K-T-C5</b>  | -1293.69505  | -1293.302329 | -1293.385406 | -1293.382821 | 3.32  |
| <b>TSB-Na-K-T-C6</b>  | -1293.694404 | -1293.301477 | -1293.383684 | -1293.38136  | 4.24  |
| <b>TSB-Na-K-T-C7</b>  | -1293.693882 | -1293.301042 | -1293.383172 | -1293.380893 | 4.53  |
| <b>TSB-Na-K-T-C8</b>  | -1293.675437 | -1293.282229 | -1293.363737 | -1293.361179 | 16.90 |
| <b>TSB-Na-K-T-C9</b>  | -1293.675612 | -1293.282179 | -1293.362555 | -1293.361088 | 16.96 |
| <b>TSB-Na-K-T-C10</b> | -1293.674443 | -1293.281039 | -1293.363346 | -1293.360422 | 17.37 |

<sup>a</sup>Energies were obtained as single points at the PW6B95(D3BJ) / def2-TZVPPD / SMD (DCM) level of theory based on structures optimized at the MN15 / def2-TZVP / SMD (DCM) level of theory.  $\Delta E$ ,  $\Delta H$ ,  $\Delta G$ , and  $\Delta G$  (GV50), hartree;  $\Delta\Delta G$ , kcal/mol.

### TSB-Na-K-C

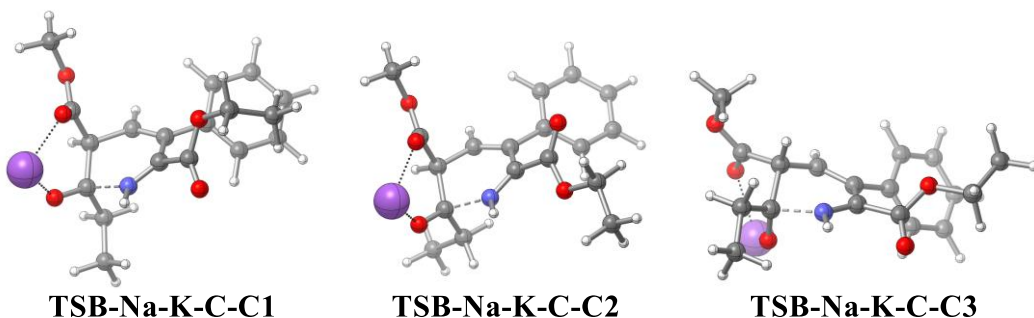

**Figure S20.** Conformers of sodium-coordinated ketone cyclization cis transition state **TSB-Na-K-C**

**Table S19.** Energies of conformers of sodium-coordinated ketone cyclization cis transition state **TSB-Na-K-C**.<sup>a</sup>

| <b>Structure</b>     | <b><math>\Delta E</math></b> | <b><math>\Delta H</math></b> | <b><math>\Delta G</math></b> | <b><math>\Delta G</math> (GV50)</b> | <b><math>\Delta\Delta G</math></b> |
|----------------------|------------------------------|------------------------------|------------------------------|-------------------------------------|------------------------------------|
| <b>TSB-Na-K-C-C1</b> | -1293.696895                 | -1293.303979                 | -1293.388198                 | -1293.384486                        | 0.00                               |
| <b>TSB-Na-K-C-C2</b> | -1293.695116                 | -1293.302311                 | -1293.387276                 | -1293.383284                        | 0.75                               |
| <b>TSB-Na-K-C-C3</b> | -1293.69421                  | -1293.301267                 | -1293.38352                  | -1293.380796                        | 2.32                               |

<sup>a</sup>Energies were obtained as single points at the PW6B95(D3BJ) / def2-TZVPPD / SMD (DCM) level of theory based on structures optimized at the MN15 / def2-TZVP / SMD (DCM) level of theory.  $\Delta E$ ,  $\Delta H$ ,  $\Delta G$ , and  $\Delta G$  (GV50), hartree;  $\Delta\Delta G$ , kcal/mol.



### 7-E-T

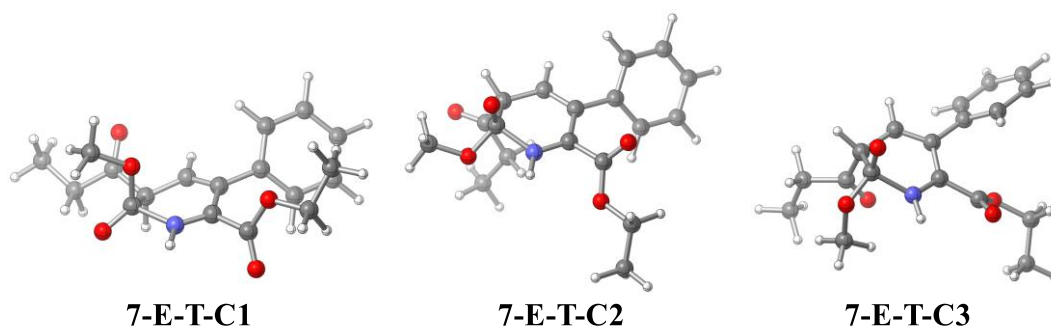

**Figure S21.** Conformers of the ester cyclization trans zwitterion **7-E-T**

**Table S20.** Energies of conformers of ester cyclization trans zwitterion **7-E-T**<sup>a</sup>

| Structure | $\Delta E$   | $\Delta H$   | $\Delta G$   | $\Delta G$ (GV50) | $\Delta\Delta G$ |
|-----------|--------------|--------------|--------------|-------------------|------------------|
| 7-E-T-C1  | -1131.27941  | -1130.890415 | -1130.971763 | -1130.968923      | 0.00             |
| 7-E-T-C2  | -1131.280776 | -1130.890868 | -1130.971201 | -1130.968187      | 0.46             |
| 7-E-T-C3  | -1131.276098 | -1130.886372 | -1130.966041 | -1130.963103      | 3.65             |

<sup>a</sup>Energies were obtained as single points at the PW6B95(D3BJ) / def2-TZVPPD / SMD (DCM) level of theory based on structures optimized at the MN15 / def2-TZVP / SMD (DCM) level of theory.  $\Delta E$ ,  $\Delta H$ ,  $\Delta G$ , and  $\Delta G$  (GV50), hartree;  $\Delta\Delta G$ , kcal/mol.

### 7-E-C

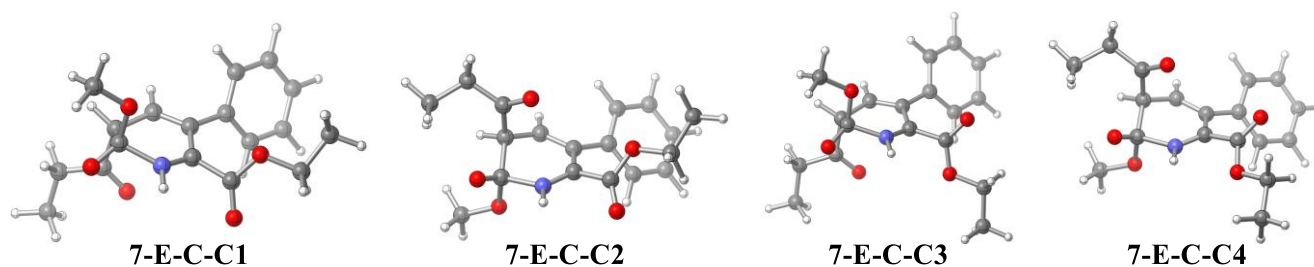

**Figure S22.** Conformers of the ester cyclization cis zwitterion **7-E-C**

**Table S21.** Energies of conformers of ester cyclization cis zwitterion **7-E-C**<sup>a</sup>

| Structure | $\Delta E$   | $\Delta H$   | $\Delta G$  | $\Delta G$ (GV50) | $\Delta\Delta G$ |
|-----------|--------------|--------------|-------------|-------------------|------------------|
| 7-E-C-C1  | -1131.280029 | -1130.890687 | -1130.97235 | -1130.968938      | 0.00             |

|                 |              |              |              |              |      |
|-----------------|--------------|--------------|--------------|--------------|------|
| <b>7-E-C-C2</b> | -1131.279698 | -1130.889941 | -1130.971489 | -1130.968166 | 0.48 |
| <b>7-E-C-C3</b> | -1131.279599 | -1130.889997 | -1130.97129  | -1130.968049 | 0.56 |
| <b>7-E-C-C4</b> | -1131.278432 | -1130.888163 | -1130.967698 | -1130.965334 | 2.26 |

<sup>a</sup>Energies were obtained as single points at the PW6B95(D3BJ) / def2-TZVPPD / SMD (DCM) level of theory based on structures optimized at the MN15 / def2-TZVP / SMD (DCM) level of theory.  $\Delta E$ ,  $\Delta H$ ,  $\Delta G$ , and  $\Delta G$  (GV50), hartree;  $\Delta\Delta G$ , kcal/mol.

### 7-K-T

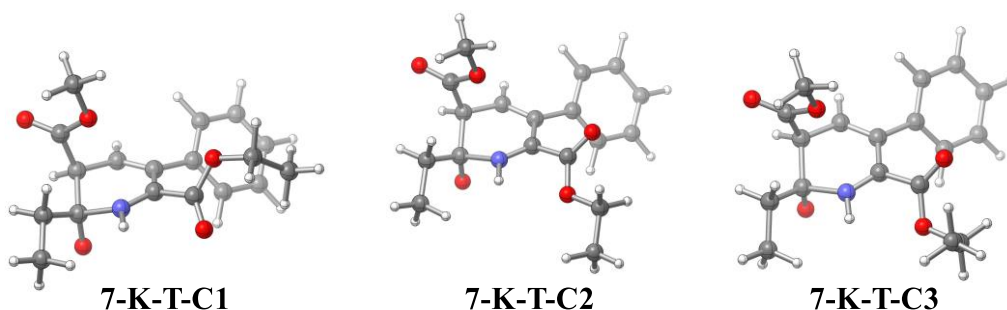

**Figure S23.** Conformers of the ketone cyclization trans zwitterion **7-K-T**

**Table S22.** Energies of conformers of ketone cyclization trans zwitterion **7-K-T**<sup>a</sup>

| <b>Structure</b> | <b><math>\Delta E</math></b> | <b><math>\Delta H</math></b> | <b><math>\Delta G</math></b> | <b><math>\Delta G</math> (GV50)</b> | <b><math>\Delta\Delta G</math></b> |
|------------------|------------------------------|------------------------------|------------------------------|-------------------------------------|------------------------------------|
| <b>7-K-T-C1</b>  | -1131.292882                 | -1130.902452                 | -1130.983396                 | -1130.979933                        | 0.00                               |
| <b>7-K-T-C2</b>  | -1131.292506                 | -1130.901975                 | -1130.98232                  | -1130.979719                        | 0.13                               |
| <b>7-K-T-C3</b>  | -1131.292007                 | -1130.901402                 | -1130.981582                 | -1130.978962                        | 0.61                               |

<sup>a</sup>Energies were obtained as single points at the PW6B95(D3BJ) / def2-TZVPPD / SMD (DCM) level of theory based on structures optimized at the MN15 / def2-TZVP / SMD (DCM) level of theory.  $\Delta E$ ,  $\Delta H$ ,  $\Delta G$ , and  $\Delta G$  (GV50), hartree;  $\Delta\Delta G$ , kcal/mol.

## 7-K-C

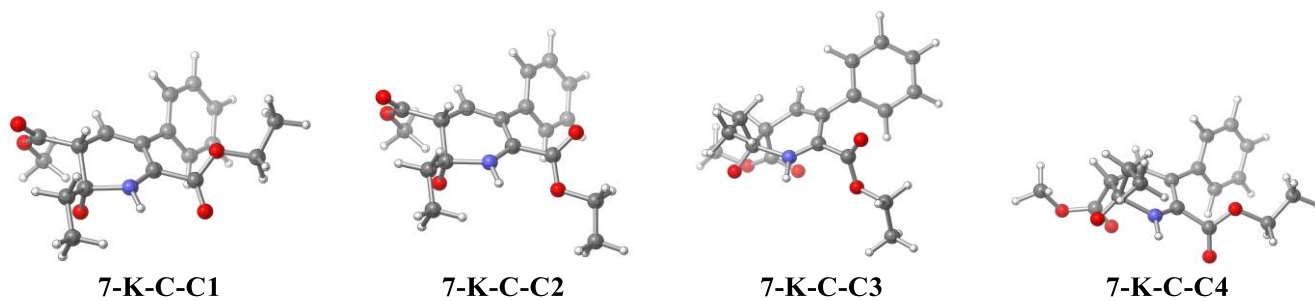

**Figure S24.** Conformers of the ketone cyclization cis zwitterion **7-K-C**

**Table S23.** Energies of conformers of ketone cyclization cis zwitterion **7-K-C**<sup>a</sup>

| Structure       | $\Delta E$   | $\Delta H$   | $\Delta G$   | $\Delta G$ (GV50) | $\Delta\Delta G$ |
|-----------------|--------------|--------------|--------------|-------------------|------------------|
| <b>7-K-C-C1</b> | -1131.286255 | -1130.895797 | -1130.974614 | -1130.9723        | 0.00             |
| <b>7-K-C-C2</b> | -1131.284978 | -1130.894603 | -1130.974559 | -1130.971751      | 0.34             |
| <b>7-K-C-C3</b> | -1131.282596 | -1130.892263 | -1130.972633 | -1130.969883      | 1.52             |
| <b>7-K-C-C4</b> | -1131.282558 | -1130.892213 | -1130.971671 | -1130.969331      | 1.86             |

<sup>a</sup>Energies were obtained as single points at the PW6B95(D3BJ) / def2-TZVPPD / SMD (DCM) level of theory based on structures optimized at the MN15 / def2-TZVP / SMD (DCM) level of theory.  $\Delta E$ ,  $\Delta H$ ,  $\Delta G$ , and  $\Delta G$  (GV50), hartree;  $\Delta\Delta G$ , kcal/mol.

## 7-Cs-E-T

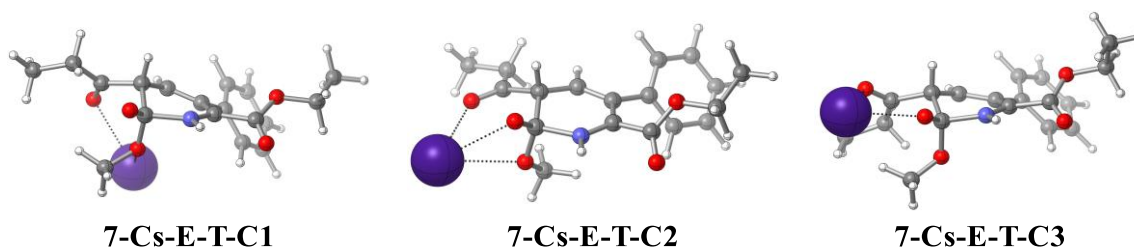

**Figure S25.** Conformers of cesium-coordinated ester cyclization trans zwitterion **7-Cs-E-T**

**Table S24.** Energies of conformers of cesium-coordinated ester cyclization trans zwitterion **7-Cs-E-T**<sup>a</sup>

| Structure          | $\Delta E$   | $\Delta H$   | $\Delta G$   | $\Delta G$ (GV50) | $\Delta\Delta G$ |
|--------------------|--------------|--------------|--------------|-------------------|------------------|
| <b>7-Cs-E-T-C1</b> | -1151.387009 | -1150.994511 | -1151.083205 | -1151.078839      | 0.00             |

|                    |              |              |              |              |      |
|--------------------|--------------|--------------|--------------|--------------|------|
| <b>7-Cs-E-T-C2</b> | -1151.387394 | -1150.994779 | -1151.081461 | -1151.077577 | 0.79 |
| <b>7-Cs-E-T-C3</b> | -1151.387523 | -1150.994716 | -1151.081012 | -1151.077543 | 0.81 |

<sup>a</sup>Energies were obtained as single points at the PW6B95(D3BJ) / def2-TZVPPD / SMD (DCM) level of theory based on structures optimized at the MN15 / def2-TZVP / SMD (DCM) level of theory.  $\Delta E$ ,  $\Delta H$ ,  $\Delta G$ , and  $\Delta G$  (GV50), hartree;  $\Delta\Delta G$ , kcal/mol.

### 7-Cs-E-C

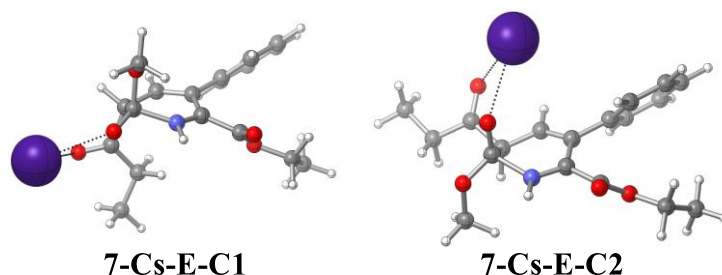

**Figure S26.** Conformers of cesium-coordinated ester cyclization cis zwitterion **7-Cs-E-C**

**Table S25.** Energies of conformers of cesium-coordinated ester cyclization cis zwitterion **7-Cs-E-C**<sup>a</sup>

| Structure          | $\Delta E$   | $\Delta H$   | $\Delta G$   | $\Delta G$ (GV50) | $\Delta\Delta G$ |
|--------------------|--------------|--------------|--------------|-------------------|------------------|
| <b>7-Cs-E-C-C1</b> | -1151.3915   | -1150.998894 | -1151.088153 | -1151.083507      | 0.00             |
| <b>7-Cs-E-C-C2</b> | -1151.392287 | -1150.999742 | -1151.087399 | -1151.083429      | 0.05             |

<sup>a</sup>Energies were obtained as single points at the PW6B95(D3BJ) / def2-TZVPPD / SMD (DCM) level of theory based on structures optimized at the MN15 / def2-TZVP / SMD (DCM) level of theory.  $\Delta E$ ,  $\Delta H$ ,  $\Delta G$ , and  $\Delta G$  (GV50), hartree;  $\Delta\Delta G$ , kcal/mol.

### 7-Cs-K-T

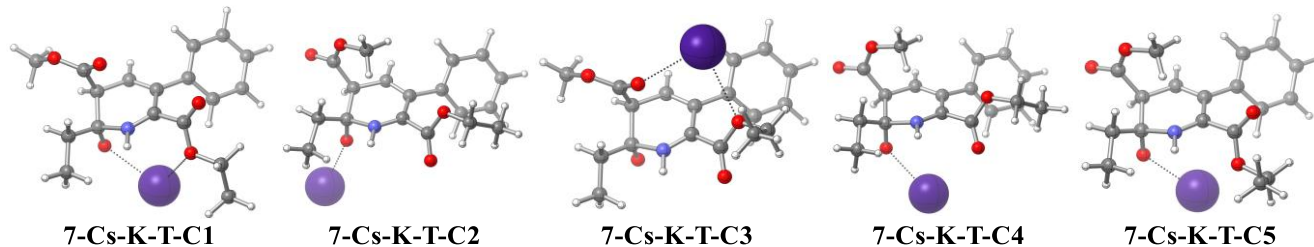

**Figure S27.** Conformers of cesium-coordinated ketone cyclization trans zwitterion **7-Cs-K-T**

**Table S26.** Energies of conformers of cesium-coordinated ketone cyclization trans zwitterion **7-Cs-K-T<sup>a</sup>**

| Structure          | $\Delta E$   | $\Delta H$   | $\Delta G$   | $\Delta G$ (GV50) | $\Delta\Delta G$ |
|--------------------|--------------|--------------|--------------|-------------------|------------------|
| <b>7-Cs-K-T-C1</b> | -1151.38841  | -1150.993995 | -1151.077868 | -1151.075694      | 0.00             |
| <b>7-Cs-K-T-C2</b> | -1151.384137 | -1150.9897   | -1151.0764   | -1151.072137      | 2.23             |
| <b>7-Cs-K-T-C3</b> | -1151.38519  | -1150.990722 | -1151.074451 | -1151.072063      | 2.28             |
| <b>7-Cs-K-T-C4</b> | -1151.383714 | -1150.989291 | -1151.073753 | -1151.070826      | 3.05             |
| <b>7-Cs-K-T-C5</b> | -1151.381412 | -1150.98702  | -1151.071301 | -1151.068553      | 4.48             |

**7-Cs-K-C**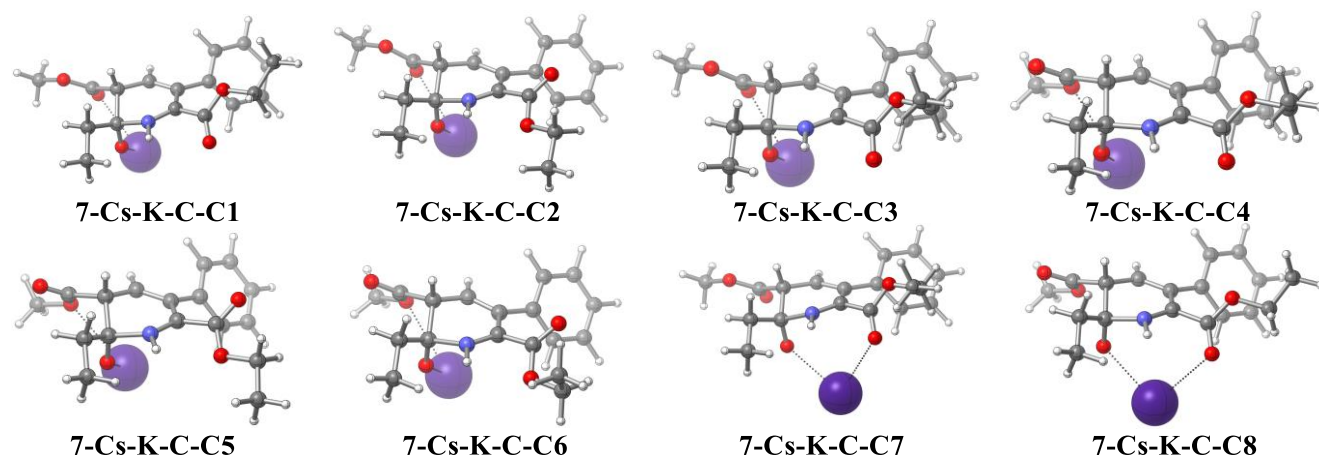**Figure S28.** Conformers of cesium-coordinated ketone cyclization cis zwitterion **7-Cs-K-C****Table S27.** Energies of conformers of cesium-coordinated ketone cyclization cis zwitterion **7-Cs-K-C<sup>a</sup>**

| Structure          | $\Delta E$   | $\Delta H$   | $\Delta G$   | $\Delta G$ (GV50) | $\Delta\Delta G$ |
|--------------------|--------------|--------------|--------------|-------------------|------------------|
| <b>7-Cs-K-C-C1</b> | -1151.405361 | -1151.011357 | -1151.098298 | -1151.094438      | 0.00             |
| <b>7-Cs-K-C-C2</b> | -1151.403936 | -1151.009852 | -1151.097115 | -1151.093215      | 0.77             |
| <b>7-Cs-K-C-C3</b> | -1151.404194 | -1151.010077 | -1151.097222 | -1151.093118      | 0.83             |
| <b>7-Cs-K-C-C4</b> | -1151.401705 | -1151.007492 | -1151.094033 | -1151.090405      | 2.53             |
| <b>7-Cs-K-C-C5</b> | -1151.4011   | -1151.007184 | -1151.092999 | -1151.090201      | 2.66             |
| <b>7-Cs-K-C-C6</b> | -1151.400965 | -1151.006688 | -1151.092327 | -1151.089188      | 3.29             |
| <b>7-Cs-K-C-C7</b> | -1151.39901  | -1151.005086 | -1151.09353  | -1151.08904       | 3.39             |

|                    |              |             |              |              |      |
|--------------------|--------------|-------------|--------------|--------------|------|
| <b>7-Cs-K-C-C8</b> | -1151.399391 | -1151.00554 | -1151.092655 | -1151.088706 | 3.60 |
|--------------------|--------------|-------------|--------------|--------------|------|

<sup>a</sup>Energies were obtained as single points at the PW6B95(D3BJ) / def2-TZVPPD / SMD (DCM) level of theory based on structures optimized at the MN15 / def2-TZVP / SMD (DCM) level of theory.  $\Delta E$ ,  $\Delta H$ ,  $\Delta G$ , and  $\Delta G$  (GV50), hartree;  $\Delta\Delta G$ , kcal/mol.

### 7-Na-E-T

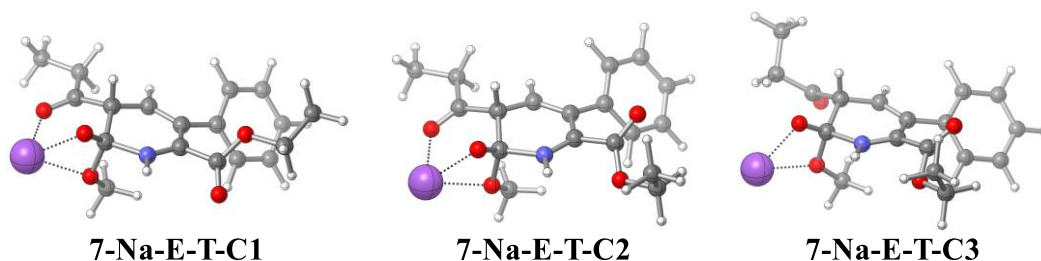

**Figure S29.** Conformers of sodium-coordinated ester cyclization trans zwitterion **7-Na-E-T**

**Table S28.** Energies of conformers of sodium-coordinated ester cyclization trans zwitterion **7-Na-E-T**<sup>a</sup>

| Structure          | $\Delta E$   | $\Delta H$   | $\Delta G$   | $\Delta G$ (GV50) | $\Delta\Delta G$ |
|--------------------|--------------|--------------|--------------|-------------------|------------------|
| <b>7-Na-E-T-C1</b> | -1293.690763 | -1293.297521 | -1293.380594 | -1293.377208      | 0.00             |
| <b>7-Na-E-T-C2</b> | -1293.688945 | -1293.295473 | -1293.37647  | -1293.374172      | 1.90             |
| <b>7-Na-E-T-C3</b> | -1293.67976  | -1293.286083 | -1293.370204 | -1293.366713      | 6.59             |

<sup>a</sup>Energies were obtained as single points at the PW6B95(D3BJ) / def2-TZVPPD / SMD (DCM) level of theory based on structures optimized at the MN15 / def2-TZVP / SMD (DCM) level of theory.  $\Delta E$ ,  $\Delta H$ ,  $\Delta G$ , and  $\Delta G$  (GV50), hartree;  $\Delta\Delta G$ , kcal/mol.

### 7-Na-E-C

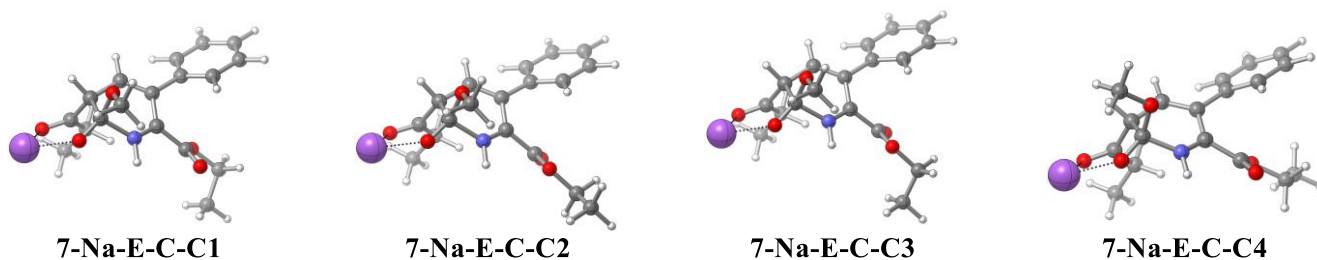

**Figure S30.** Conformers of sodium-coordinated ester cyclization cis zwitterion **7-Na-E-C**

**Table S29.** Energies of conformers of sodium-coordinated ester cyclization cis zwitterion **7-Na-E-C**<sup>a</sup>

| Structure          | $\Delta E$   | $\Delta H$   | $\Delta G$   | $\Delta G$ (GV50) | $\Delta\Delta G$ |
|--------------------|--------------|--------------|--------------|-------------------|------------------|
| <b>7-Na-E-C-C1</b> | -1293.689303 | -1293.296063 | -1293.379956 | -1293.376738      | 0.00             |
| <b>7-Na-E-C-C2</b> | -1293.689222 | -1293.296017 | -1293.379457 | -1293.376619      | 0.07             |
| <b>7-Na-E-C-C3</b> | -1293.688758 | -1293.295534 | -1293.378991 | -1293.376066      | 0.42             |
| <b>7-Na-E-C-C4</b> | -1293.687808 | -1293.294649 | -1293.378254 | -1293.375061      | 1.05             |

<sup>a</sup>Energies were obtained as single points at the PW6B95(D3BJ) / def2-TZVPPD / SMD (DCM) level of theory based on structures optimized at the MN15 / def2-TZVP / SMD (DCM) level of theory.  $\Delta E$ ,  $\Delta H$ ,  $\Delta G$ , and  $\Delta G$  (GV50), hartree;  $\Delta\Delta G$ , kcal/mol.

**7-Na-K-T**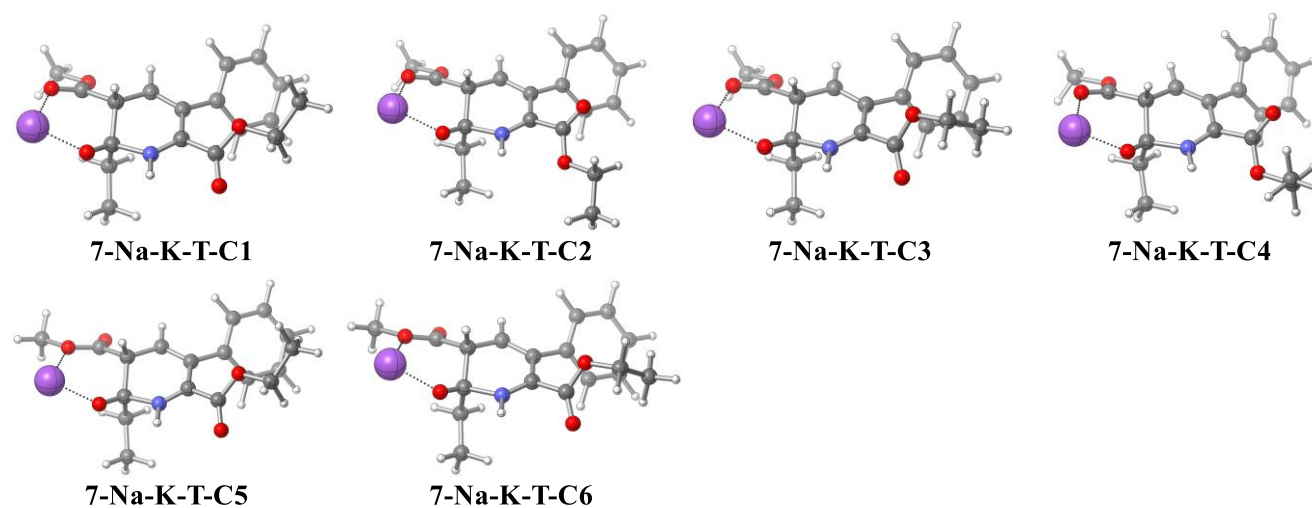**Figure S31.** Conformers of sodium-coordinated ketone cyclization trans zwitterion **7-Na-K-T****Table S30.** Energies of conformers of sodium-coordinated ketone cyclization trans zwitterion **7-Na-K-T**<sup>a</sup>

| Structure          | $\Delta E$   | $\Delta H$   | $\Delta G$   | $\Delta G$ (GV50) | $\Delta\Delta G$ |
|--------------------|--------------|--------------|--------------|-------------------|------------------|
| <b>7-Na-K-T-C1</b> | -1293.702579 | -1293.308272 | -1293.392141 | -1293.389103      | 0.00             |
| <b>7-Na-K-T-C2</b> | -1293.701098 | -1293.306942 | -1293.391318 | -1293.388068      | 0.65             |
| <b>7-Na-K-T-C3</b> | -1293.701874 | -1293.30756  | -1293.390868 | -1293.388011      | 0.69             |
| <b>7-Na-K-T-C4</b> | -1293.70072  | -1293.306273 | -1293.389534 | -1293.386776      | 1.46             |
| <b>7-Na-K-T-C5</b> | -1293.697157 | -1293.302892 | -1293.386388 | -1293.383571      | 3.47             |



|                    |              |              |              |              |      |
|--------------------|--------------|--------------|--------------|--------------|------|
| <b>7-Na-K-T-C6</b> | -1293.696394 | -1293.302099 | -1293.384749 | -1293.382255 | 4.30 |
|--------------------|--------------|--------------|--------------|--------------|------|

<sup>a</sup>Energies were obtained as single points at the PW6B95(D3BJ) / def2-TZVPPD / SMD (DCM) level of theory based on structures optimized at the MN15 / def2-TZVP / SMD (DCM) level of theory.  $\Delta E$ ,  $\Delta H$ ,  $\Delta G$ , and  $\Delta G$  (GV50), hartree;  $\Delta\Delta G$ , kcal/mol.

### 7-Na-K-C

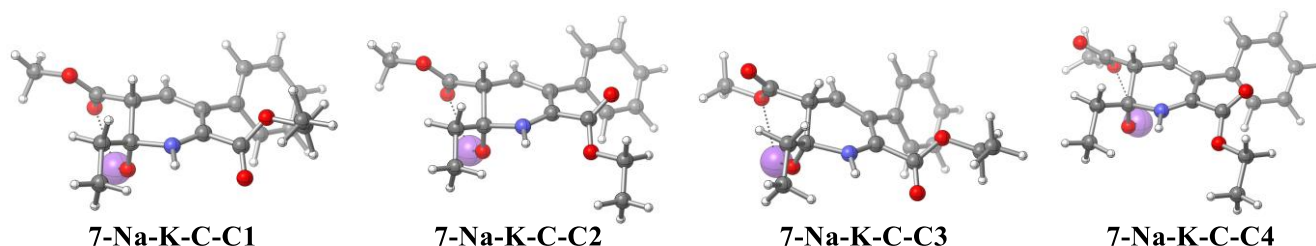

**Figure S32.** Conformers of sodium-coordinated ketone cyclization cis zwitterion **7-Na-K-C**

**Table S31.** Energies of conformers of sodium-coordinated ketone cyclization cis zwitterion **7-Na-K-C<sup>a</sup>**

| Structure          | $\Delta E$   | $\Delta H$   | $\Delta G$   | $\Delta G$ (GV50) | $\Delta\Delta G$ |
|--------------------|--------------|--------------|--------------|-------------------|------------------|
| <b>7-Na-K-C-C1</b> | -1293.702982 | -1293.308205 | -1293.391529 | -1293.388466      | 0.00             |
| <b>7-Na-K-C-C2</b> | -1293.702844 | -1293.307994 | -1293.390561 | -1293.387995      | 0.30             |
| <b>7-Na-K-C-C3</b> | -1293.696666 | -1293.302098 | -1293.384951 | -1293.382424      | 3.79             |
| <b>7-Na-K-C-C4</b> | -1293.696511 | -1293.301949 | -1293.384419 | -1293.382145      | 3.97             |

<sup>a</sup>Energies were obtained as single points at the PW6B95(D3BJ) / def2-TZVPPD / SMD (DCM) level of theory based on structures optimized at the MN15 / def2-TZVP / SMD (DCM) level of theory.  $\Delta E$ ,  $\Delta H$ ,  $\Delta G$ , and  $\Delta G$  (GV50), hartree;  $\Delta\Delta G$ , kcal/mol.



**7b-E-T**

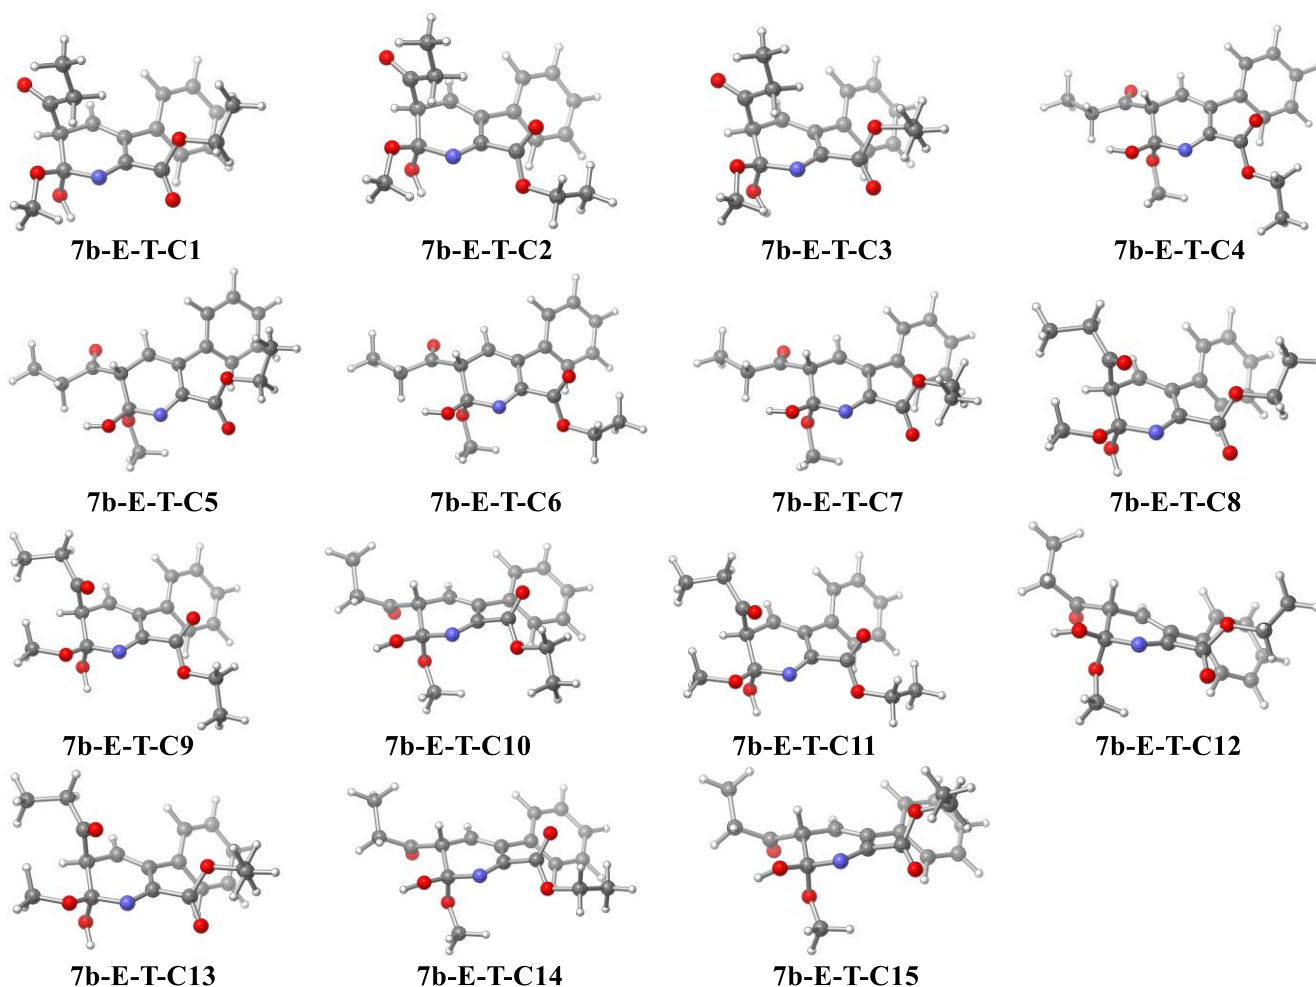

**Figure S33.** Conformers of ester cyclization trans intermediate **7b-E-T**.

**Table S32.** Energies of conformers of ester cyclization trans intermediate **7b-E-T**. <sup>a</sup>

| Structure        | $\Delta E$   | $\Delta H$   | $\Delta G$   | $\Delta G$ (GV50) | $\Delta\Delta G$ |
|------------------|--------------|--------------|--------------|-------------------|------------------|
| <b>7b-E-T-C1</b> | -1131.307293 | -1130.916683 | -1130.996557 | -1130.993753      | 0.00             |
| <b>7b-E-T-C2</b> | -1131.306542 | -1130.915885 | -1130.995522 | -1130.992876      | 0.55             |
| <b>7b-E-T-C3</b> | -1131.30617  | -1130.915425 | -1130.995073 | -1130.99241       | 0.84             |
| <b>7b-E-T-C4</b> | -1131.302129 | -1130.911645 | -1130.992008 | -1130.989077      | 2.93             |
| <b>7b-E-T-C5</b> | -1131.302403 | -1130.911847 | -1130.991695 | -1130.988891      | 3.05             |
| <b>7b-E-T-C6</b> | -1131.301914 | -1130.911358 | -1130.990935 | -1130.988308      | 3.42             |
| <b>7b-E-T-C7</b> | -1131.301228 | -1130.910491 | -1130.990297 | -1130.987478      | 3.94             |

|                   |              |              |              |              |      |
|-------------------|--------------|--------------|--------------|--------------|------|
| <b>7b-E-T-C8</b>  | -1131.301607 | -1130.910899 | -1130.989902 | -1130.98733  | 4.03 |
| <b>7b-E-T-C9</b>  | -1131.301051 | -1130.910474 | -1130.989755 | -1130.98728  | 4.06 |
| <b>7b-E-T-C10</b> | -1131.29982  | -1130.909024 | -1130.989393 | -1130.986583 | 4.50 |
| <b>7b-E-T-C11</b> | -1131.3008   | -1130.910074 | -1130.988384 | -1130.98628  | 4.69 |
| <b>7b-E-T-C12</b> | -1131.300078 | -1130.909299 | -1130.988727 | -1130.986248 | 4.71 |
| <b>7b-E-T-C13</b> | -1131.300399 | -1130.909594 | -1130.988441 | -1130.985939 | 4.90 |
| <b>7b-E-T-C14</b> | -1131.299619 | -1130.908811 | -1130.988076 | -1130.985675 | 5.07 |
| <b>7b-E-T-C15</b> | -1131.29884  | -1130.908034 | -1130.988451 | -1130.985277 | 5.32 |

<sup>a</sup>Energies were obtained as single points at the PW6B95(D3BJ) / def2-TZVPPD / SMD (DCM) level of theory based on structures optimized at the MN15 / def2-TZVP / SMD (DCM) level of theory.  $\Delta E$ ,  $\Delta H$ ,  $\Delta G$ , and  $\Delta G$  (GV50), hartree;  $\Delta\Delta G$ , kcal/mol.

#### 7b-E-C

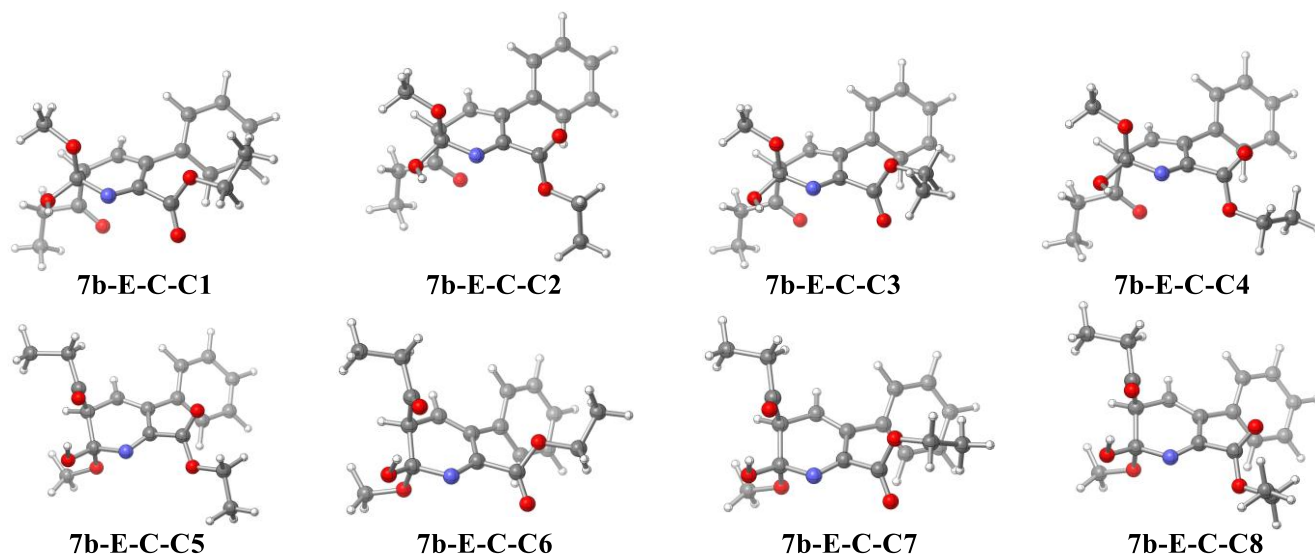

**Figure S34.** Conformers of ester cyclization cis intermediate **7b-E-C**.

**Table S33.** Energies of conformers of ester cyclization cis intermediate **7b-E-C**. <sup>a</sup>

| Structure        | $\Delta E$   | $\Delta H$   | $\Delta G$   | $\Delta G$ (GV50) | $\Delta\Delta G$ |
|------------------|--------------|--------------|--------------|-------------------|------------------|
| <b>7b-E-C-C1</b> | -1131.30287  | -1130.912383 | -1130.992676 | -1130.989573      | 0.00             |
| <b>7b-E-C-C2</b> | -1131.302691 | -1130.911955 | -1130.991872 | -1130.988916      | 0.41             |

|                  |              |              |              |              |      |
|------------------|--------------|--------------|--------------|--------------|------|
| <b>7b-E-C-C3</b> | -1131.301856 | -1130.911192 | -1130.991422 | -1130.988345 | 0.77 |
| <b>7b-E-C-C4</b> | -1131.302487 | -1130.911712 | -1130.99088  | -1130.98817  | 0.88 |
| <b>7b-E-C-C5</b> | -1131.300679 | -1130.909622 | -1130.989712 | -1130.986772 | 1.76 |
| <b>7b-E-C-C6</b> | -1131.300834 | -1130.909761 | -1130.989626 | -1130.986527 | 1.91 |
| <b>7b-E-C-C7</b> | -1131.300525 | -1130.909562 | -1130.988869 | -1130.985894 | 2.31 |
| <b>7b-E-C-C8</b> | -1131.300079 | -1130.908941 | -1130.988878 | -1130.985821 | 2.35 |

<sup>a</sup>Energies were obtained as single points at the PW6B95(D3BJ) / def2-TZVPPD / SMD (DCM) level of theory based on structures optimized at the MN15 / def2-TZVP / SMD (DCM) level of theory.  $\Delta E$ ,  $\Delta H$ ,  $\Delta G$ , and  $\Delta G$  (GV50), hartree;  $\Delta\Delta G$ , kcal/mol.

### 7b-K-T

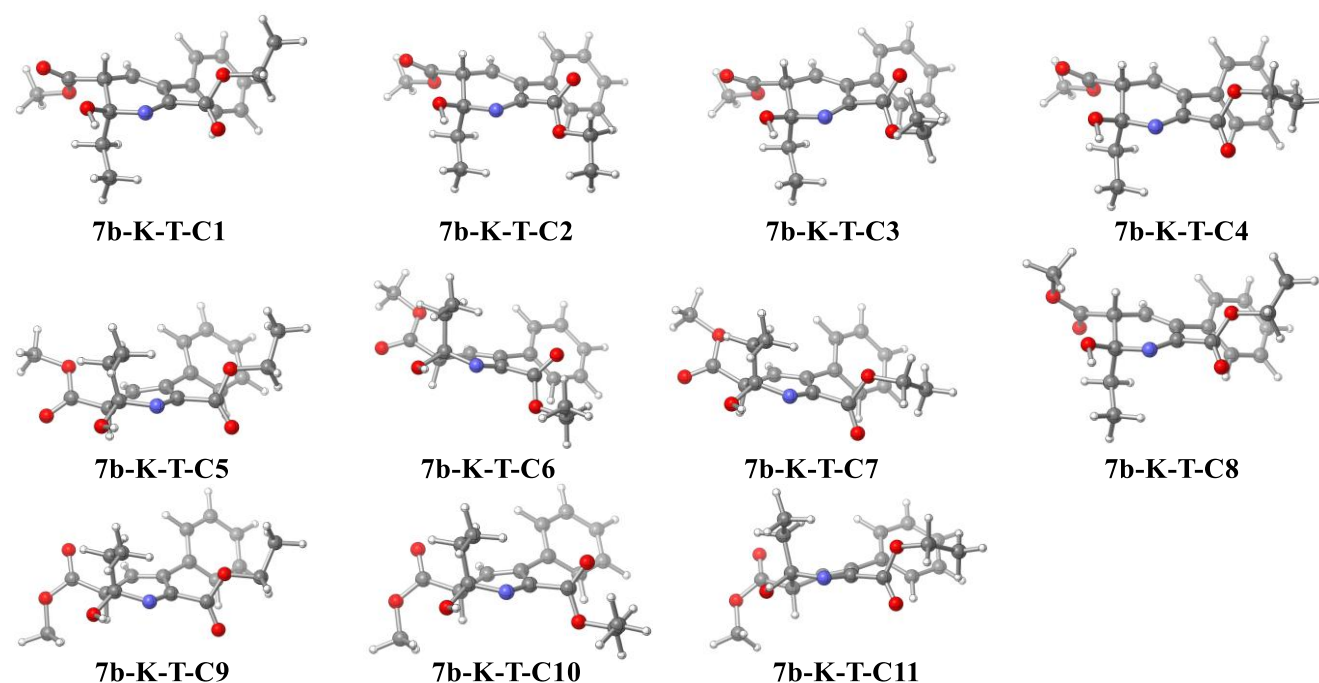

**Figure S35.** Conformers of ketone cyclization trans intermediate **7b-K-T**.

**Table S34.** Energies of conformers of ketone cyclization trans intermediate **7b-K-T**.<sup>a</sup>

| Structure        | $\Delta E$   | $\Delta H$   | $\Delta G$   | $\Delta G$ (GV50) | $\Delta\Delta G$ |
|------------------|--------------|--------------|--------------|-------------------|------------------|
| <b>7b-K-T-C1</b> | -1131.324063 | -1130.932801 | -1131.012585 | -1131.010013      | 0.00             |
| <b>7b-K-T-C2</b> | -1131.323542 | -1130.9323   | -1131.012369 | -1131.0097        | 0.20             |

|                   |              |              |              |              |      |
|-------------------|--------------|--------------|--------------|--------------|------|
| <b>7b-K-T-C3</b>  | -1131.322876 | -1130.931579 | -1131.011849 | -1131.008929 | 0.68 |
| <b>7b-K-T-C4</b>  | -1131.323612 | -1130.932264 | -1131.011088 | -1131.008926 | 0.68 |
| <b>7b-K-T-C5</b>  | -1131.320677 | -1130.929699 | -1131.010148 | -1131.007291 | 1.71 |
| <b>7b-K-T-C6</b>  | -1131.319884 | -1130.928558 | -1131.008495 | -1131.005735 | 2.68 |
| <b>7b-K-T-C7</b>  | -1131.320005 | -1130.928734 | -1131.008239 | -1131.00559  | 2.78 |
| <b>7b-K-T-C8</b>  | -1131.317387 | -1130.926038 | -1131.004712 | -1131.002681 | 4.60 |
| <b>7b-K-T-C9</b>  | -1131.31374  | -1130.922602 | -1131.002495 | -1130.999853 | 6.38 |
| <b>7b-K-T-C10</b> | -1131.312726 | -1130.9214   | -1131.002179 | -1130.998984 | 6.92 |
| <b>7b-K-T-C11</b> | -1131.313067 | -1130.921708 | -1131.001315 | -1130.998545 | 7.20 |

<sup>a</sup>Energies were obtained as single points at the PW6B95(D3BJ) / def2-TZVPPD / SMD (DCM) level of theory based on structures optimized at the MN15 / def2-TZVP / SMD (DCM) level of theory.  $\Delta E$ ,  $\Delta H$ ,  $\Delta G$ , and  $\Delta G$  (GV50), hartree;  $\Delta\Delta G$ , kcal/mol.

#### 7b-K-C

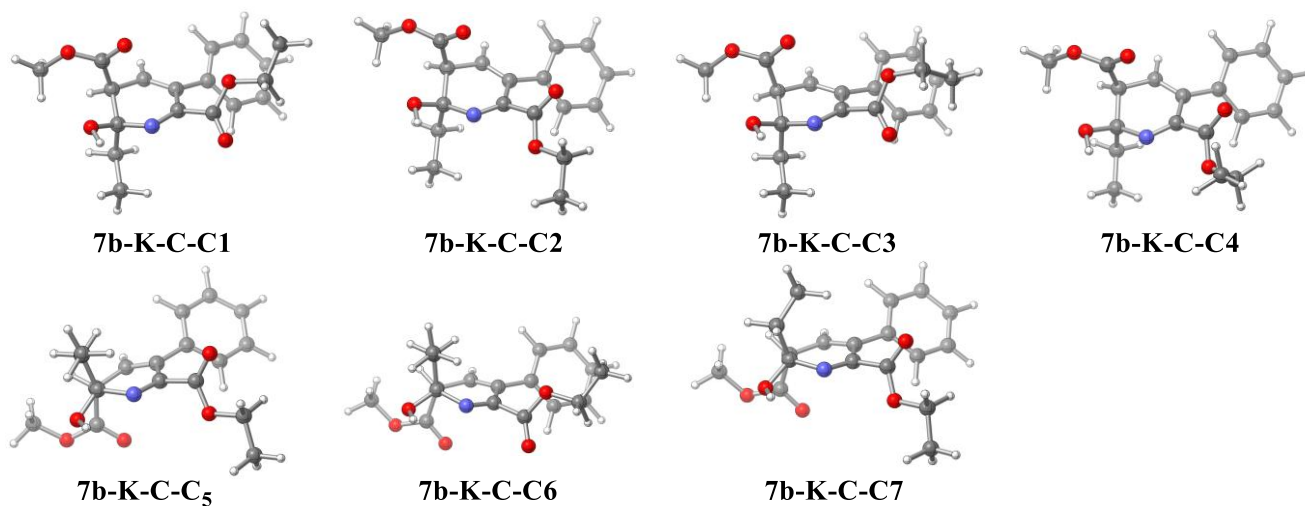

**Figure S36.** Conformers of ketone cyclization cis intermediate **7b-K-C**.

**Table S35.** Energies of conformers of ketone cyclization cis intermediate **7b-K-C**.<sup>a</sup>

| Structure        | $\Delta E$   | $\Delta H$   | $\Delta G$   | $\Delta G$ (GV50) | $\Delta\Delta G$ |
|------------------|--------------|--------------|--------------|-------------------|------------------|
| <b>7b-K-C-C1</b> | -1131.318139 | -1130.926748 | -1131.006283 | -1131.003659      | 0.00             |
| <b>7b-K-C-C2</b> | -1131.317236 | -1130.925845 | -1131.005333 | -1131.002849      | 0.51             |

|                  |              |              |              |              |      |
|------------------|--------------|--------------|--------------|--------------|------|
| <b>7b-K-C-C3</b> | -1131.317632 | -1130.926213 | -1131.005063 | -1131.00276  | 0.56 |
| <b>7b-K-C-C4</b> | -1131.316644 | -1130.925136 | -1131.004291 | -1131.001865 | 1.13 |
| <b>7b-K-C-C5</b> | -1131.314503 | -1130.923161 | -1131.00325  | -1131.000344 | 2.08 |
| <b>7b-K-C-C6</b> | -1131.314515 | -1130.923328 | -1131.002632 | -1131.000216 | 2.16 |
| <b>7b-K-C-C7</b> | -1131.314822 | -1130.923425 | -1131.002202 | -1130.999593 | 2.55 |

<sup>a</sup>Energies were obtained as single points at the PW6B95(D3BJ) / def2-TZVPPD / SMD (DCM) level of theory based on structures optimized at the MN15 / def2-TZVP / SMD (DCM) level of theory.  $\Delta E$ ,  $\Delta H$ ,  $\Delta G$ , and  $\Delta G$  (GV50), hartree;  $\Delta\Delta G$ , kcal/mol.

### 7b-Cs-E-T

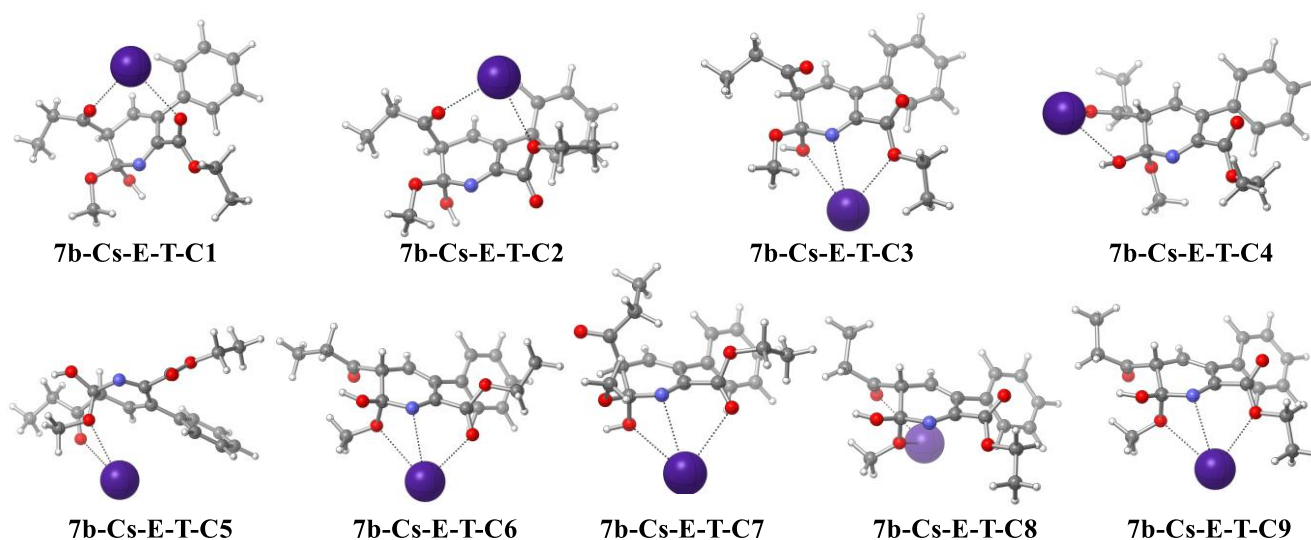

**Figure S37.** Conformers of cesium-coordinated ester cyclization trans intermediate **7b-Cs-E-T**.

**Table S36.** Energies of conformers of cesium-coordinated ester cyclization trans intermediate **7b-Cs-E-T**.<sup>a</sup>

| Structure           | $\Delta E$   | $\Delta H$   | $\Delta G$   | $\Delta G$ (GV50) | $\Delta\Delta G$ |
|---------------------|--------------|--------------|--------------|-------------------|------------------|
| <b>7b-Cs-E-T-C1</b> | -1151.408106 | -1151.014243 | -1151.101014 | -1151.097741      | 0.00             |
| <b>7b-Cs-E-T-C2</b> | -1151.405469 | -1151.011552 | -1151.096958 | -1151.094135      | 2.26             |
| <b>7b-Cs-E-T-C3</b> | -1151.404135 | -1151.010165 | -1151.095909 | -1151.092836      | 3.08             |
| <b>7b-Cs-E-T-C4</b> | -1151.400011 | -1151.005953 | -1151.093706 | -1151.089887      | 4.93             |
| <b>7b-Cs-E-T-C5</b> | -1151.399802 | -1151.006218 | -1151.090792 | -1151.087885      | 6.18             |

|                     |              |              |              |              |      |
|---------------------|--------------|--------------|--------------|--------------|------|
| <b>7b-Cs-E-T-C6</b> | -1151.398933 | -1151.005312 | -1151.090542 | -1151.087701 | 6.30 |
| <b>7b-Cs-E-T-C7</b> | -1151.399249 | -1151.006569 | -1151.089864 | -1151.087603 | 6.36 |
| <b>7b-Cs-E-T-C8</b> | -1151.397494 | -1151.003751 | -1151.090256 | -1151.086766 | 6.89 |
| <b>7b-Cs-E-T-C9</b> | -1151.39588  | -1151.001861 | -1151.086728 | -1151.084545 | 8.28 |

<sup>a</sup>Energies were obtained as single points at the PW6B95(D3BJ) / def2-TZVPPD / SMD (DCM) level of theory based on structures optimized at the MN15 / def2-TZVP / SMD (DCM) level of theory.  $\Delta E$ ,  $\Delta H$ ,  $\Delta G$ , and  $\Delta G$  (GV50), hartree;  $\Delta\Delta G$ , kcal/mol.

### 7b-Cs-E-C

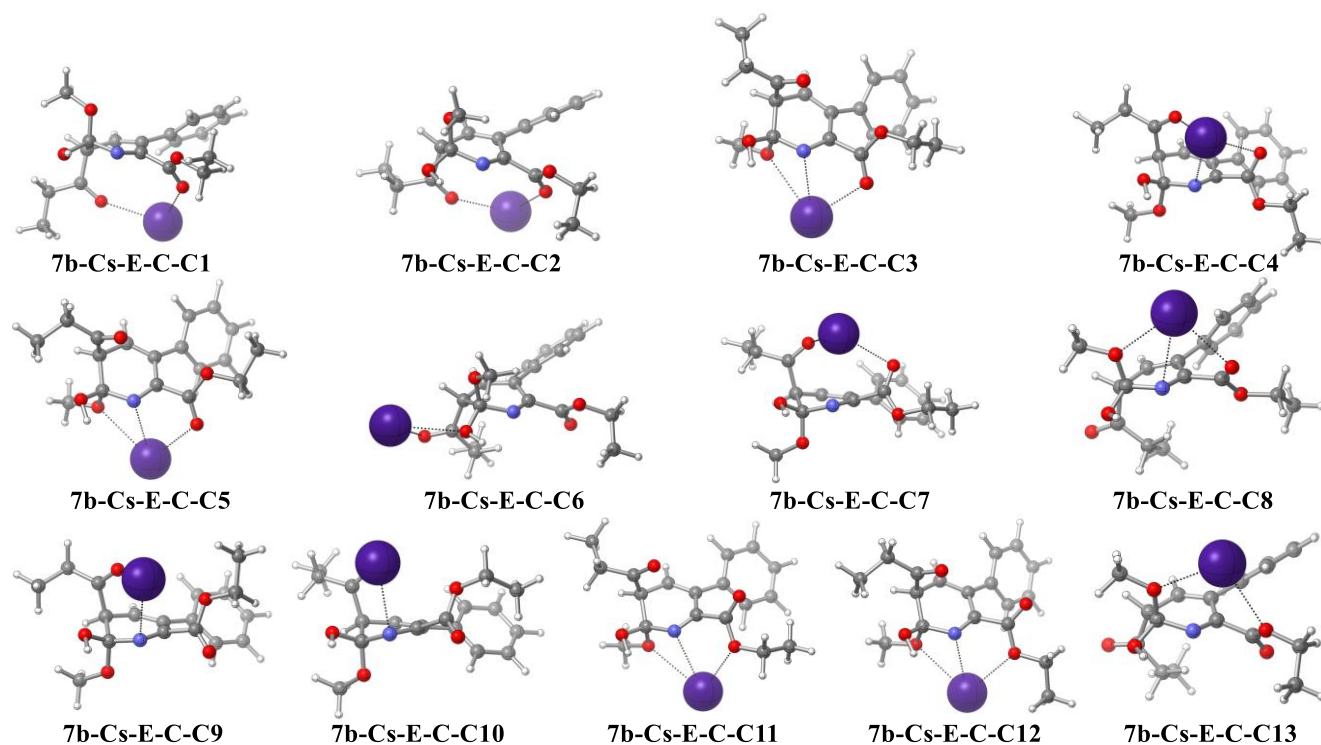

**Figure S38.** Conformers of cesium-coordinated ester cyclization cis intermediate **7b-Cs-E-C**.

**Table S37.** Energies of conformers of cesium-coordinated ester cyclization cis intermediate **7b-Cs-E-C**.<sup>a</sup>

| Structure           | $\Delta E$   | $\Delta H$   | $\Delta G$   | $\Delta G$ (GV50) | $\Delta\Delta G$ |
|---------------------|--------------|--------------|--------------|-------------------|------------------|
| <b>7b-Cs-E-C-C1</b> | -1151.410611 | -1151.016717 | -1151.103733 | -1151.099996      | 0.00             |
| <b>7b-Cs-E-C-C2</b> | -1151.40865  | -1151.014482 | -1151.102141 | -1151.098273      | 1.08             |
| <b>7b-Cs-E-C-C3</b> | -1151.406214 | -1151.011933 | -1151.097577 | -1151.094794      | 3.26             |



|                      |              |              |              |              |      |
|----------------------|--------------|--------------|--------------|--------------|------|
| <b>7b-Cs-E-C-C4</b>  | -1151.405165 | -1151.011058 | -1151.098361 | -1151.094493 | 3.45 |
| <b>7b-Cs-E-C-C5</b>  | -1151.40533  | -1151.011152 | -1151.097165 | -1151.094162 | 3.66 |
| <b>7b-Cs-E-C-C6</b>  | -1151.404505 | -1151.010382 | -1151.097517 | -1151.093956 | 3.79 |
| <b>7b-Cs-E-C-C7</b>  | -1151.405399 | -1151.010938 | -1151.097472 | -1151.093778 | 3.90 |
| <b>7b-Cs-E-C-C8</b>  | -1151.40516  | -1151.010764 | -1151.09678  | -1151.093666 | 3.97 |
| <b>7b-Cs-E-C-C9</b>  | -1151.404489 | -1151.010328 | -1151.096346 | -1151.093289 | 4.21 |
| <b>7b-Cs-E-C-C10</b> | -1151.405261 | -1151.010858 | -1151.095715 | -1151.093046 | 4.36 |
| <b>7b-Cs-E-C-C11</b> | -1151.403552 | -1151.009252 | -1151.095432 | -1151.092217 | 4.88 |
| <b>7b-Cs-E-C-C12</b> | -1151.403297 | -1151.009092 | -1151.094906 | -1151.092135 | 4.93 |
| <b>7b-Cs-E-C-C13</b> | -1151.402292 | -1151.00806  | -1151.094983 | -1151.091417 | 5.38 |

<sup>a</sup>Energies were obtained as single points at the PW6B95(D3BJ) / def2-TZVPPD / SMD (DCM) level of theory based on structures optimized at the MN15 / def2-TZVP / SMD (DCM) level of theory.  $\Delta E$ ,  $\Delta H$ ,  $\Delta G$ , and  $\Delta G$  (GV50), hartree;  $\Delta\Delta G$ , kcal/mol.

#### 7b-Cs-K-T

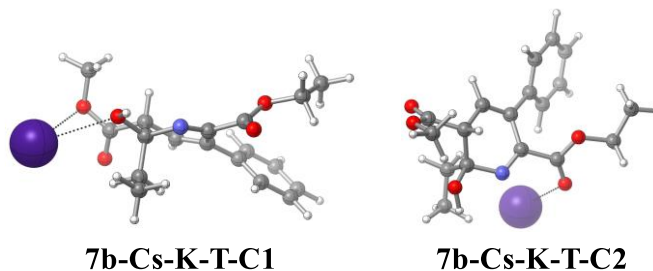

**Figure S39.** Conformers of cesium-coordinated ketone cyclization trans intermediate **7b-Cs-K-T**.

**Table S38.** Energies of conformers of cesium-coordinated ketone cyclization trans intermediate **7b-Cs-K-T**.<sup>a</sup>

| Structure           | $\Delta E$   | $\Delta H$   | $\Delta G$   | $\Delta G$ (GV50) | $\Delta\Delta G$ |
|---------------------|--------------|--------------|--------------|-------------------|------------------|
| <b>7b-Cs-K-T-C1</b> | -1151.416007 | -1151.021834 | -1151.109092 | -1151.105355      | 0.00             |
| <b>7b-Cs-K-T-C2</b> | -1151.41427  | -1151.019559 | -1151.105332 | -1151.102053      | 2.07             |

<sup>a</sup>Energies were obtained as single points at the PW6B95(D3BJ) / def2-TZVPPD / SMD (DCM) level of theory based on structures optimized at the MN15 / def2-TZVP / SMD (DCM) level of theory.  $\Delta E$ ,  $\Delta H$ ,  $\Delta G$ , and  $\Delta G$  (GV50), hartree;  $\Delta\Delta G$ , kcal/mol.

**7b-Cs-K-C**

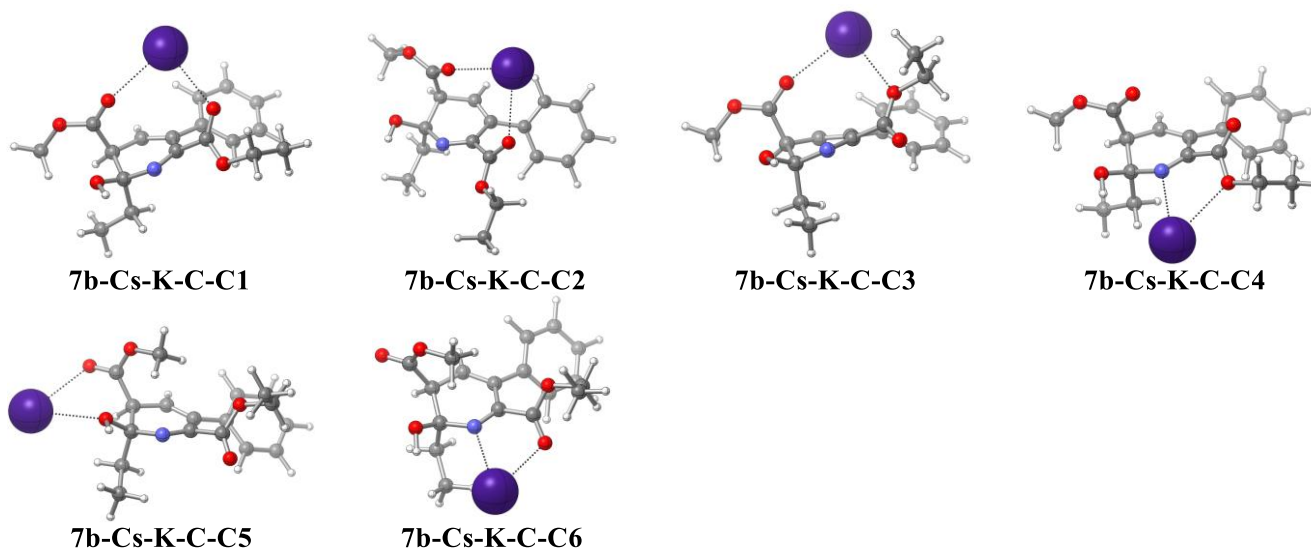

**Figure S40.** Conformers of cesium-coordinated ketone cyclization cis intermediate **7b-Cs-K-C**.

**Table S39.** Energies of conformers of cesium-coordinated ketone cyclization cis intermediate **7b-Cs-K-C**.<sup>a</sup>

| Structure           | $\Delta E$   | $\Delta H$   | $\Delta G$   | $\Delta G$ (GV50) | $\Delta\Delta G$ |
|---------------------|--------------|--------------|--------------|-------------------|------------------|
| <b>7b-Cs-K-C-C1</b> | -1151.423624 | -1151.028927 | -1151.114179 | -1151.111496      | 0.00             |
| <b>7b-Cs-K-C-C2</b> | -1151.423408 | -1151.028722 | -1151.114443 | -1151.11142       | 0.05             |
| <b>7b-Cs-K-C-C3</b> | -1151.420259 | -1151.025543 | -1151.110093 | -1151.107469      | 2.53             |
| <b>7b-Cs-K-C-C4</b> | -1151.414741 | -1151.019973 | -1151.105694 | -1151.102788      | 5.46             |
| <b>7b-Cs-K-C-C5</b> | -1151.413019 | -1151.018234 | -1151.104039 | -1151.100872      | 6.67             |
| <b>7b-Cs-K-C-C6</b> | -1151.412621 | -1151.017725 | -1151.102629 | -1151.099637      | 7.44             |

<sup>a</sup>Energies were obtained as single points at the PW6B95(D3BJ) / def2-TZVPPD / SMD (DCM) level of theory based on structures optimized at the MN15 / def2-TZVP / SMD (DCM) level of theory.  $\Delta E$ ,  $\Delta H$ ,  $\Delta G$ , and  $\Delta G$  (GV50), hartree;  $\Delta\Delta G$ , kcal/mol.



## 7b-Na-E-T

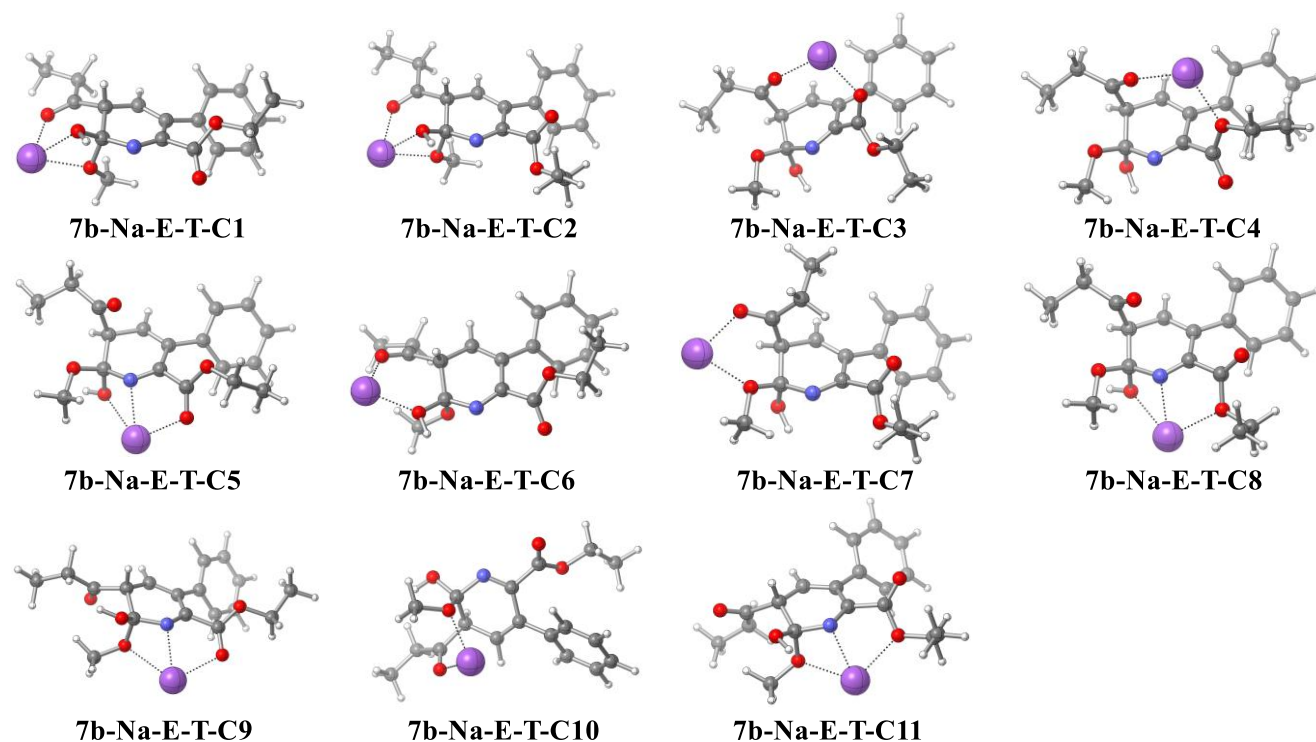

**Figure S41.** Conformers of sodium-coordinated ester cyclization trans intermediate **7b-Na-E-T**.

**Table S40.** Energies of conformers of sodium-coordinated ester cyclization trans intermediate **7b-Na-E-T**.<sup>a</sup>

| Structure            | $\Delta E$   | $\Delta H$   | $\Delta G$   | $\Delta G$ (GV50) | $\Delta\Delta G$ |
|----------------------|--------------|--------------|--------------|-------------------|------------------|
| <b>7b-Na-E-T-C1</b>  | -1293.704301 | -1293.310743 | -1293.392234 | -1293.3899        | 0.00             |
| <b>7b-Na-E-T-C2</b>  | -1293.703559 | -1293.309746 | -1293.391551 | -1293.388892      | 0.63             |
| <b>7b-Na-E-T-C3</b>  | -1293.700853 | -1293.306582 | -1293.390343 | -1293.387541      | 1.48             |
| <b>7b-Na-E-T-C4</b>  | -1293.695294 | -1293.301481 | -1293.383779 | -1293.38172       | 5.13             |
| <b>7b-Na-E-T-C5</b>  | -1293.695113 | -1293.300898 | -1293.383297 | -1293.381276      | 5.41             |
| <b>7b-Na-E-T-C6</b>  | -1293.694318 | -1293.300526 | -1293.38244  | -1293.380374      | 5.98             |
| <b>7b-Na-E-T-C7</b>  | -1293.693394 | -1293.299145 | -1293.383041 | -1293.38026       | 6.05             |
| <b>7b-Na-E-T-C8</b>  | -1293.690765 | -1293.29675  | -1293.380648 | -1293.377966      | 7.49             |
| <b>7b-Na-E-T-C9</b>  | -1293.690821 | -1293.296856 | -1293.379276 | -1293.377038      | 8.07             |
| <b>7b-Na-E-T-C10</b> | -1293.689561 | -1293.295775 | -1293.37766  | -1293.375597      | 8.98             |

|                      |              |              |              |              |      |
|----------------------|--------------|--------------|--------------|--------------|------|
| <b>7b-Na-E-T-C11</b> | -1293.688103 | -1293.294384 | -1293.377299 | -1293.374812 | 9.47 |
|----------------------|--------------|--------------|--------------|--------------|------|

<sup>a</sup>Energies were obtained as single points at the PW6B95(D3BJ) / def2-TZVPPD / SMD (DCM) level of theory based on structures optimized at the MN15 / def2-TZVP / SMD (DCM) level of theory.  $\Delta E$ ,  $\Delta H$ ,  $\Delta G$ , and  $\Delta G$  (GV50), hartree;  $\Delta\Delta G$ , kcal/mol.

### 7b-Na-E-C

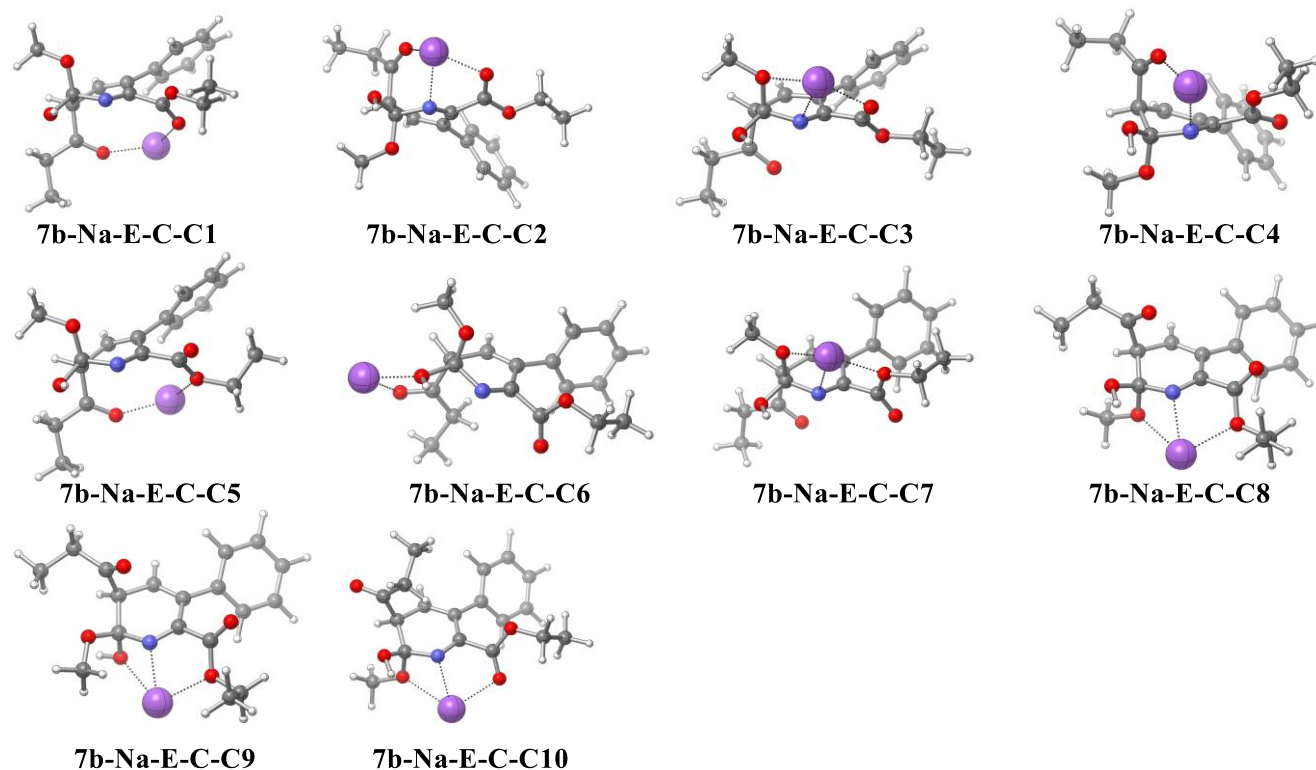

**Figure S42.** Conformers of sodium-coordinated ester cyclization cis intermediate **7b-Na-E-C**.

**Table S41.** Energies of conformers of sodium-coordinated ester cyclization cis intermediate **7b-Na-E-C**.<sup>a</sup>

| Structure           | $\Delta E$   | $\Delta H$   | $\Delta G$   | $\Delta G$ (GV50) | $\Delta\Delta G$ |
|---------------------|--------------|--------------|--------------|-------------------|------------------|
| <b>7b-Na-E-C-C1</b> | -1293.704417 | -1293.310235 | -1293.393168 | -1293.390573      | 0.00             |
| <b>7b-Na-E-C-C2</b> | -1293.702937 | -1293.308389 | -1293.391014 | -1293.388526      | 1.28             |
| <b>7b-Na-E-C-C3</b> | -1293.699282 | -1293.305349 | -1293.388848 | -1293.386264      | 2.70             |
| <b>7b-Na-E-C-C4</b> | -1293.700302 | -1293.305633 | -1293.387141 | -1293.384931      | 3.54             |
| <b>7b-Na-E-C-C5</b> | -1293.698217 | -1293.30441  | -1293.387178 | -1293.384565      | 3.77             |
| <b>7b-Na-E-C-C6</b> | -1293.691847 | -1293.298136 | -1293.381742 | -1293.378702      | 7.45             |

|                      |              |              |              |              |       |
|----------------------|--------------|--------------|--------------|--------------|-------|
| <b>7b-Na-E-C-C7</b>  | -1293.691442 | -1293.297529 | -1293.381299 | -1293.378389 | 7.65  |
| <b>7b-Na-E-C-C8</b>  | -1293.691639 | -1293.29746  | -1293.380819 | -1293.378351 | 7.67  |
| <b>7b-Na-E-C-C9</b>  | -1293.696171 | -1293.300418 | -1293.379064 | -1293.377694 | 8.08  |
| <b>7b-Na-E-C-C10</b> | -1293.683815 | -1293.289548 | -1293.373034 | -1293.370215 | 12.78 |

<sup>a</sup>Energies were obtained as single points at the PW6B95(D3BJ) / def2-TZVPPD / SMD (DCM) level of theory based on structures optimized at the MN15 / def2-TZVP / SMD (DCM) level of theory.  $\Delta E$ ,  $\Delta H$ ,  $\Delta G$ , and  $\Delta G$  (GV50), hartree;  $\Delta\Delta G$ , kcal/mol.

### 7b-Na-K-T

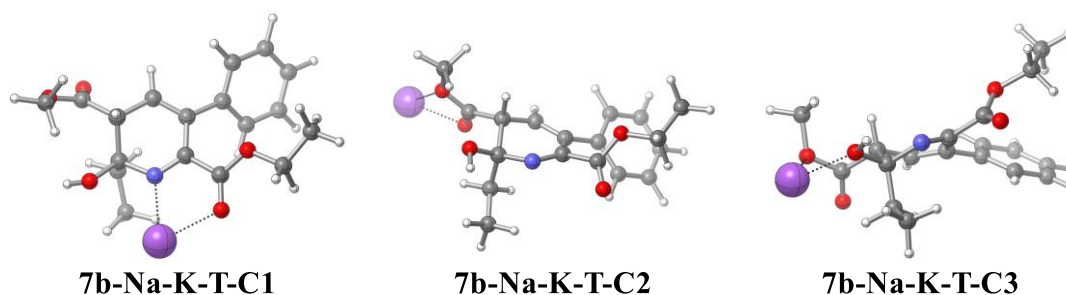

**Figure S43.** Conformers of sodium-coordinated ketone cyclization trans intermediate **7b-Na-K-T**.

**Table S42.** Energies of conformers sodium-coordinated ketone cyclization trans intermediate **7b-Na-K-T**.<sup>a</sup>

| Structure           | $\Delta E$   | $\Delta H$   | $\Delta G$   | $\Delta G$ (GV50) | $\Delta\Delta G$ |
|---------------------|--------------|--------------|--------------|-------------------|------------------|
| <b>7b-Na-K-T-C1</b> | -1293.710722 | -1293.315948 | -1293.399878 | -1293.396803      | 0.00             |
| <b>7b-Na-K-T-C2</b> | -1293.700964 | -1293.306366 | -1293.390166 | -1293.387645      | 5.75             |
| <b>7b-Na-K-T-C3</b> | -1293.698312 | -1293.303819 | -1293.387019 | -1293.384412      | 7.78             |

<sup>a</sup>Energies were obtained as single points at the PW6B95(D3BJ) / def2-TZVPPD / SMD (DCM) level of theory based on structures optimized at the MN15 / def2-TZVP / SMD (DCM) level of theory.  $\Delta E$ ,  $\Delta H$ ,  $\Delta G$ , and  $\Delta G$  (GV50), hartree;  $\Delta\Delta G$ , kcal/mol.

## 7b-Na-K-C

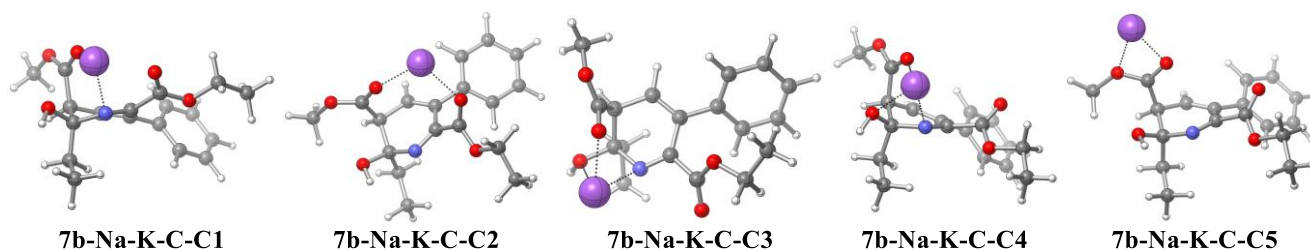

**Figure S44.** Conformers of sodium-coordinated ketone cyclization cis intermediate **7b-Na-K-C**.

**Table S43.** Energies of conformers sodium-coordinated ketone cyclization cis intermediate **7b-Na-K-C**.<sup>a</sup>

| Structure           | $\Delta E$   | $\Delta H$   | $\Delta G$   | $\Delta G$ (GV50) | $\Delta\Delta G$ |
|---------------------|--------------|--------------|--------------|-------------------|------------------|
| <b>7b-Na-K-C-C1</b> | -1293.719304 | -1293.324572 | -1293.408179 | -1293.405272      | 0.00             |
| <b>7b-Na-K-C-C2</b> | -1293.717835 | -1293.322756 | -1293.404913 | -1293.402775      | 1.57             |
| <b>7b-Na-K-C-C3</b> | -1293.717533 | -1293.322484 | -1293.40504  | -1293.402618      | 1.67             |
| <b>7b-Na-K-C-C4</b> | -1293.717183 | -1293.322023 | -1293.404056 | -1293.401724      | 2.23             |
| <b>7b-Na-K-C-C5</b> | -1293.70273  | -1293.307912 | -1293.392152 | -1293.389087      | 10.16            |

<sup>a</sup>Energies were obtained as single points at the PW6B95(D3BJ) / def2-TZVPPD / SMD (DCM) level of theory based on structures optimized at the MN15 / def2-TZVP / SMD (DCM) level of theory.  $\Delta E$ ,  $\Delta H$ ,  $\Delta G$ , and  $\Delta G$  (GV50), hartree;  $\Delta\Delta G$ , kcal/mol.

## 8-E

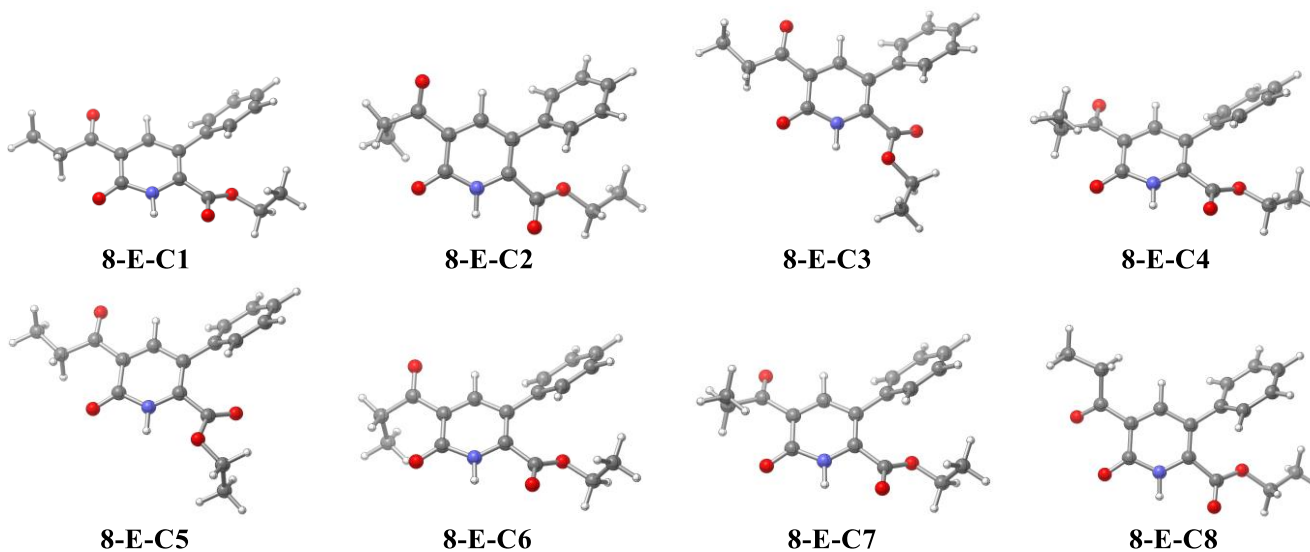

**Figure S45.** Conformers of pyridone product **8-E**.

**Table S44.** Energies of conformers of pyridone product **8-E**.<sup>a</sup>

| Structure     | $\Delta E$   | $\Delta H$   | $\Delta G$   | $\Delta G$ (GV50) | $\Delta\Delta G$ |
|---------------|--------------|--------------|--------------|-------------------|------------------|
| <b>8-E-C1</b> | -1015.439527 | -1015.106237 | -1015.178984 | -1015.176366      | 0.00             |
| <b>8-E-C2</b> | -1015.438641 | -1015.105285 | -1015.178905 | -1015.175911      | 0.29             |
| <b>8-E-C3</b> | -1015.438417 | -1015.105192 | -1015.178854 | -1015.175872      | 0.31             |
| <b>8-E-C4</b> | -1015.438703 | -1015.10526  | -1015.17859  | -1015.175789      | 0.36             |
| <b>8-E-C5</b> | -1015.437812 | -1015.104461 | -1015.177084 | -1015.174549      | 1.14             |
| <b>8-E-C6</b> | -1015.437904 | -1015.104371 | -1015.176596 | -1015.174302      | 1.30             |
| <b>8-E-C7</b> | -1015.437945 | -1015.104363 | -1015.17649  | -1015.174217      | 1.35             |
| <b>8-E-C8</b> | -1015.435252 | -1015.101952 | -1015.175419 | -1015.172856      | 2.20             |

<sup>a</sup> Energies were obtained as single points at the PW6B95(D3BJ) / def2-TZVPPD / SMD (DCM) level of theory based on structures optimized at the MN15 / def2-TZVP / SMD (DCM) level of theory.  $\Delta E$ ,  $\Delta H$ ,  $\Delta G$ , and  $\Delta G$  (GV50), hartree;  $\Delta\Delta G$ , kcal/mol.

**8-K**

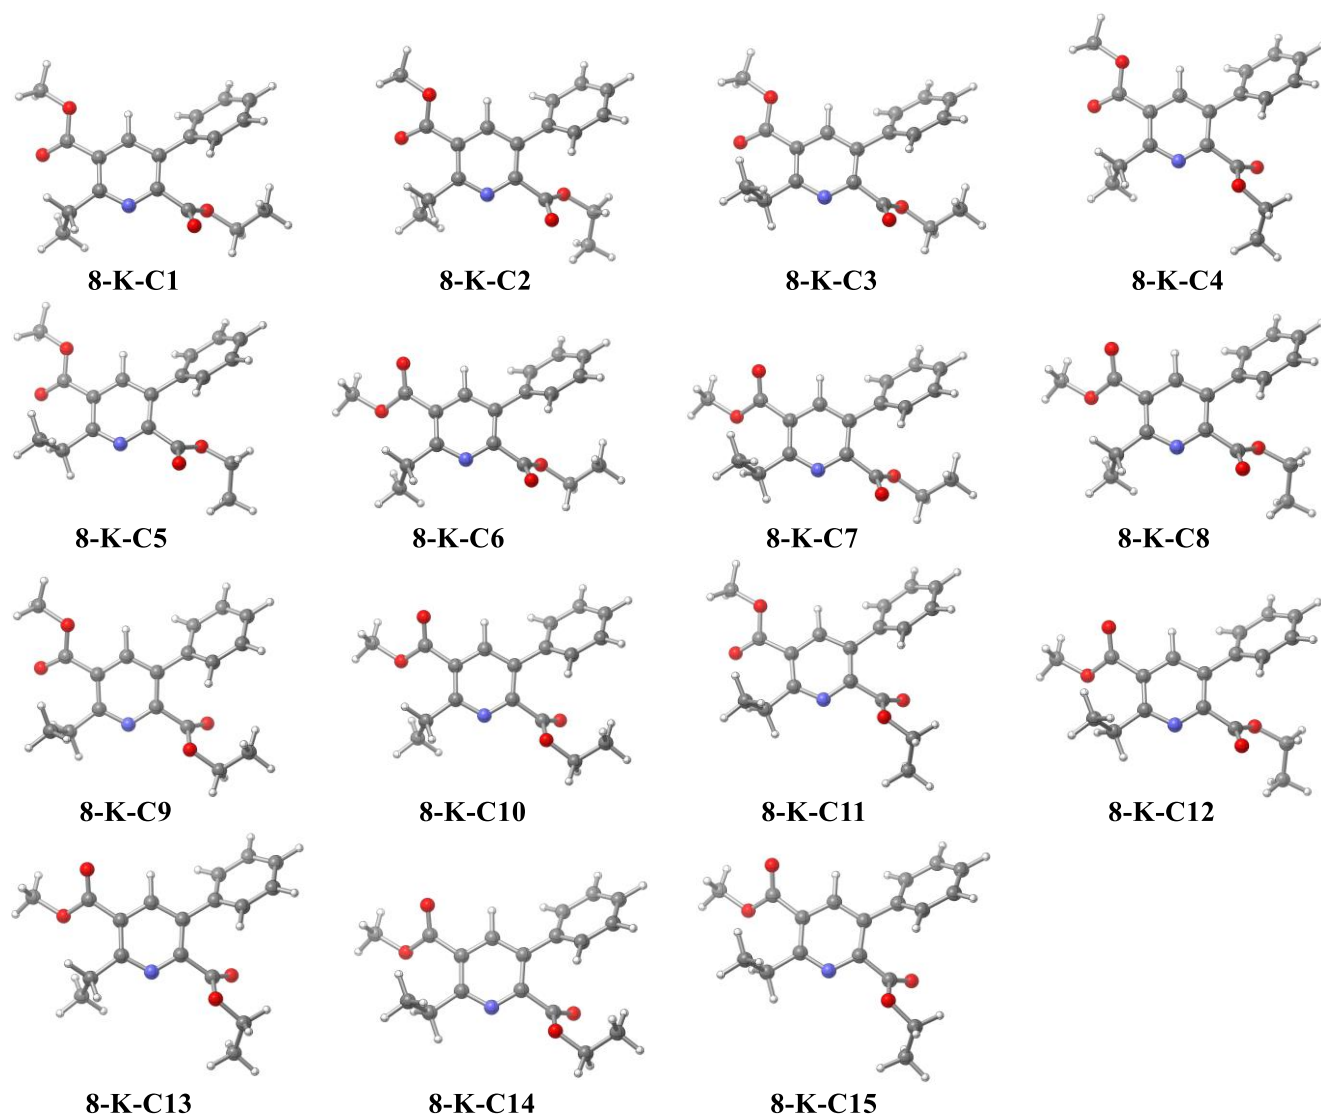

**Figure S46.** Conformers of pyridine product **8-K**.

**Table S45.** Energies of conformers of pyridine product **8-K**.<sup>a</sup>

| Structure     | $\Delta E$   | $\Delta H$   | $\Delta G$   | $\Delta G$ (GV50) | $\Delta\Delta G$ |
|---------------|--------------|--------------|--------------|-------------------|------------------|
| <b>8-K-C1</b> | -1054.809355 | -1054.445911 | -1054.521945 | -1054.519291      | 0.00             |
| <b>8-K-C2</b> | -1054.808921 | -1054.445435 | -1054.521905 | -1054.519148      | 0.09             |
| <b>8-K-C3</b> | -1054.808898 | -1054.445482 | -1054.522044 | -1054.518983      | 0.19             |
| <b>8-K-C4</b> | -1054.808631 | -1054.445091 | -1054.521331 | -1054.518709      | 0.37             |
| <b>8-K-C5</b> | -1054.808457 | -1054.444926 | -1054.521898 | -1054.518679      | 0.38             |

|                |              |              |              |              |      |
|----------------|--------------|--------------|--------------|--------------|------|
| <b>8-K-C6</b>  | -1054.808693 | -1054.445217 | -1054.521092 | -1054.518479 | 0.51 |
| <b>8-K-C7</b>  | -1054.808474 | -1054.445058 | -1054.520796 | -1054.518423 | 0.54 |
| <b>8-K-C8</b>  | -1054.808207 | -1054.44468  | -1054.521064 | -1054.518371 | 0.58 |
| <b>8-K-C9</b>  | -1054.808431 | -1054.444952 | -1054.520964 | -1054.51833  | 0.60 |
| <b>8-K-C10</b> | -1054.808195 | -1054.44473  | -1054.520783 | -1054.518274 | 0.64 |
| <b>8-K-C11</b> | -1054.808143 | -1054.444595 | -1054.521143 | -1054.518243 | 0.66 |
| <b>8-K-C12</b> | -1054.80804  | -1054.444531 | -1054.520725 | -1054.51817  | 0.70 |
| <b>8-K-C13</b> | -1054.807908 | -1054.444377 | -1054.521045 | -1054.518153 | 0.71 |
| <b>8-K-C14</b> | -1054.807987 | -1054.444587 | -1054.520528 | -1054.518118 | 0.74 |
| <b>8-K-C15</b> | -1054.807679 | -1054.444196 | -1054.520725 | -1054.51797  | 0.83 |

<sup>a</sup>Energies were obtained as single points at the PW6B95(D3BJ) / def2-TZVPPD / SMD (DCM) level of theory based on structures optimized at the MN15 / def2-TZVP / SMD (DCM) level of theory.  $\Delta E$ ,  $\Delta H$ ,  $\Delta G$ , and  $\Delta G$  (GV50), hartree;  $\Delta\Delta G$ , kcal/mol.

**Table S46.** Energies of other structures.<sup>a</sup>

| <b>Structure</b> | <b><math>\Delta E</math></b> | <b><math>\Delta H</math></b> | <b><math>\Delta G</math></b> | <b><math>\Delta G</math> (GV50)</b> |
|------------------|------------------------------|------------------------------|------------------------------|-------------------------------------|
| N <sub>2</sub> O | -184.9544308                 | -184.9393862                 | -184.9642602                 | -184.9642602                        |
| H <sub>2</sub> O | -76.55366451                 | -76.52870578                 | -76.55079278                 | -76.55079278                        |
| MeOH             | -115.9109426                 | -115.8554341                 | -115.8826501                 | -115.8826511                        |
| Cs <sup>+</sup>  | -20.08973125                 | -20.08737107                 | -20.10664507                 | -20.10664507                        |
| Na <sup>+</sup>  | -162.3547732                 | -162.3524127                 | -162.3692017                 | -162.3692017                        |

<sup>a</sup>Energies were obtained as single points at the PW6B95(D3BJ) / def2-TZVPPD / SMD (DCM) level of theory based on structures optimized at the MN15 / def2-TZVP / SMD (DCM) level of theory.  $\Delta E$ ,  $\Delta H$ ,  $\Delta G$ , and  $\Delta G$  (GV50), hartree;  $\Delta\Delta G$ , kcal/mol.

**Distortion/Interaction-Activation Strain Fragments and Electronic Energy by Structure –  
MN15 / def2-TZVP / SMD (DCM)**

**6b Fragment F1**

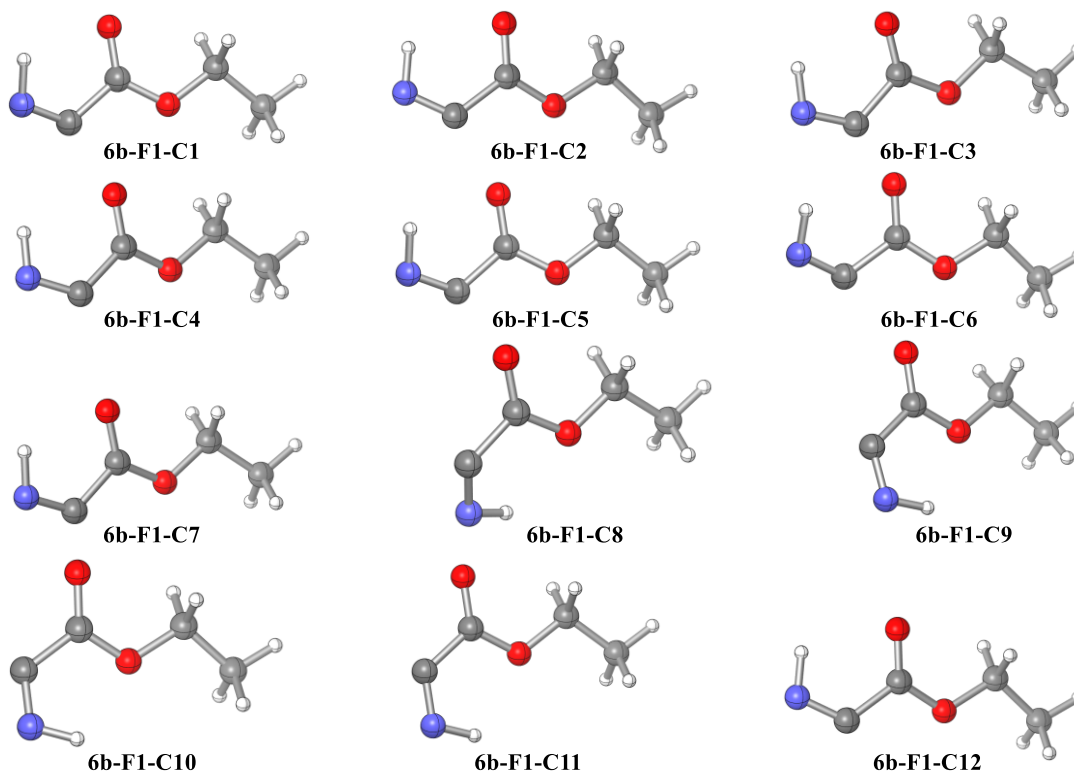

**Figure S47.** Conformers of fragment **F1** for intermediate **6b**.

**Table S47.** Energies of conformers of fragment **F1** for intermediate **6b**. <sup>a</sup>

| Structure     | $\Delta E$   |
|---------------|--------------|
| <b>6b-C3</b>  | -360.890759  |
| <b>6b-C2</b>  | -360.8901045 |
| <b>6b-C12</b> | -360.8900083 |
| <b>6b-C7</b>  | -360.8898753 |
| <b>6b-C5</b>  | -360.8895681 |
| <b>6b-C1</b>  | -360.8895596 |
| <b>6b-C6</b>  | -360.8892895 |
| <b>6b-C4</b>  | -360.8892737 |
| <b>6b-C11</b> | -360.8886553 |



|               |              |
|---------------|--------------|
| <b>6b-C9</b>  | -360.888134  |
| <b>6b-C8</b>  | -360.8879095 |
| <b>6b-C10</b> | -360.8878114 |

<sup>a</sup>Energies were obtained as single points at the MN15 / def2-TZVP / SMD (DCM) level of theory based on structures optimized at the same level of theory.  $\Delta E$ , hartree.

### 6b Fragment F2

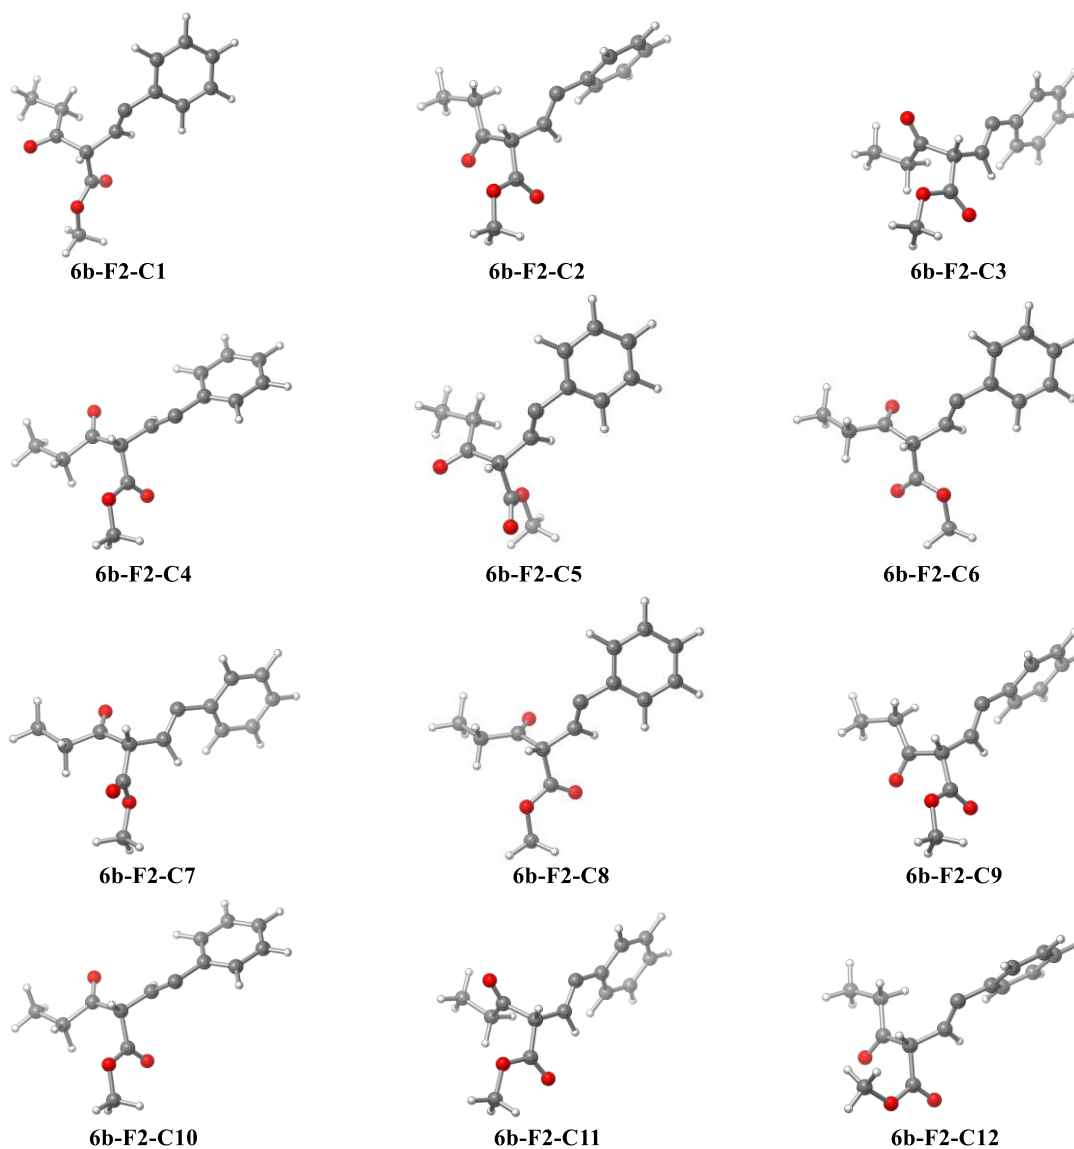

**Figure S48.** Conformers of fragment **F2** for intermediate **6b**.

**Table S48.** Energies of conformers of fragment **F2** for intermediate **6b**.<sup>a</sup>

| Structure     | $\Delta E$   |
|---------------|--------------|
| <b>6b-C2</b>  | -767.5050699 |
| <b>6b-C9</b>  | -767.5047208 |
| <b>6b-C11</b> | -767.5040672 |
| <b>6b-C3</b>  | -767.5038929 |
| <b>6b-C8</b>  | -767.5023681 |
| <b>6b-C4</b>  | -767.5023488 |
| <b>6b-C10</b> | -767.5023311 |
| <b>6b-C1</b>  | -767.5021559 |
| <b>6b-C6</b>  | -767.501702  |
| <b>6b-C7</b>  | -767.501279  |
| <b>6b-C5</b>  | -767.5010874 |
| <b>6b-C12</b> | -767.4973661 |

<sup>a</sup>Energies were obtained as single points at the MN15 / def2-TZVP / SMD (DCM) level of theory based on structures optimized at the same level of theory.  $\Delta E$ , hartree.

#### 6b-Cs Fragment F1

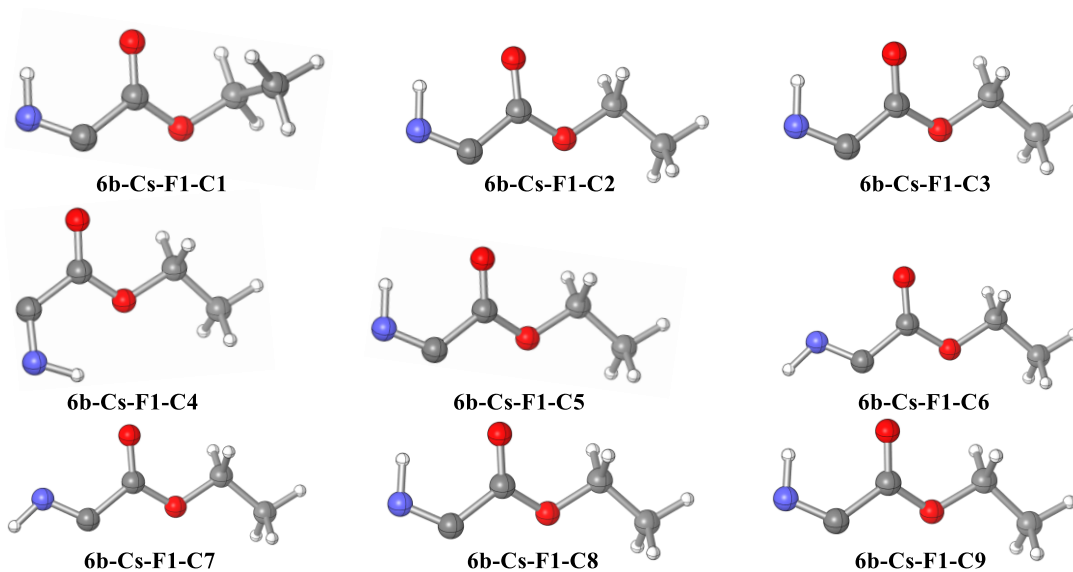

**Figure S49.** Conformers of fragment **F1** for intermediate **6b-Cs**.

**Table S49.** Energies of conformers of fragment **F1** for intermediate **6b-Cs**.<sup>a</sup>

| Structure       | $\Delta E$   |
|-----------------|--------------|
| <b>6b-Cs-C6</b> | -360.8949175 |
| <b>6b-Cs-C7</b> | -360.8943334 |
| <b>6b-Cs-C1</b> | -360.88957   |
| <b>6b-Cs-C5</b> | -360.8894261 |
| <b>6b-Cs-C9</b> | -360.8893931 |
| <b>6b-Cs-C8</b> | -360.8892505 |
| <b>6b-Cs-C3</b> | -360.8892505 |
| <b>6b-Cs-C2</b> | -360.888974  |
| <b>6b-Cs-C4</b> | -360.8882698 |

<sup>a</sup>Energies were obtained as single points at the MN15 / def2-TZVP / SMD (DCM) level of theory based on structures optimized at the same level of theory.  $\Delta E$ , hartree.

#### 6b-Cs Fragment F2

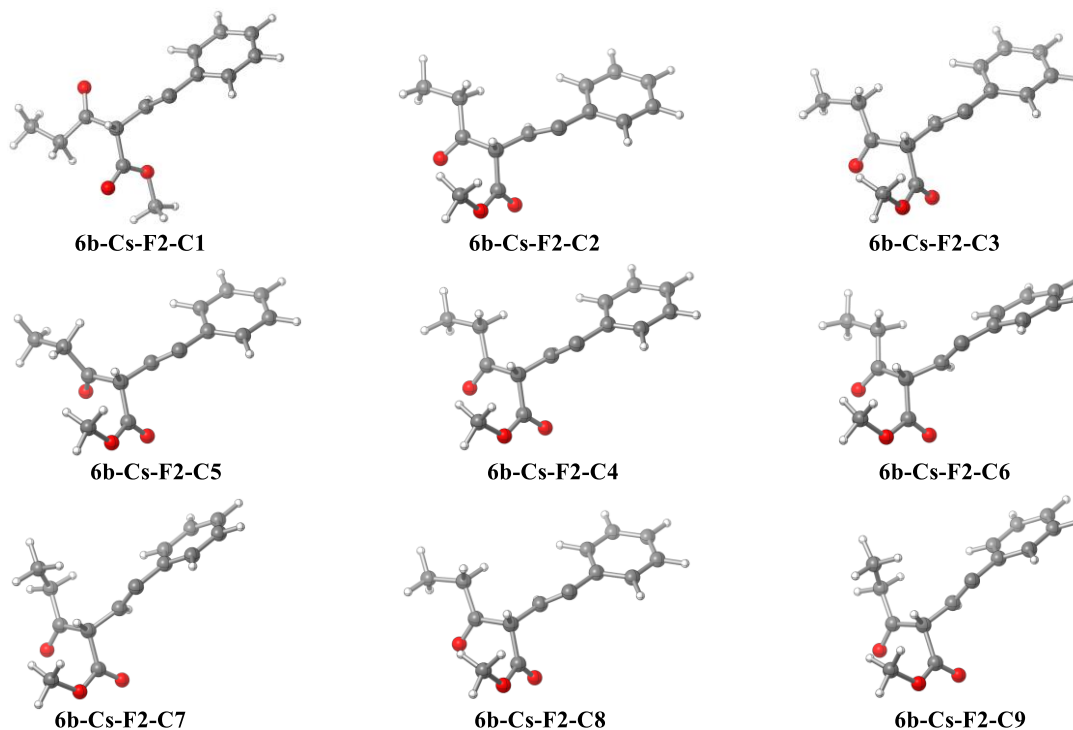

**Figure S50.** Conformers of fragment **F2** for intermediate **6b-Cs**.

**Table S50.** Energies of conformers of fragment **F2** for intermediate **6b-Cs**.<sup>a</sup>

| Structure       | $\Delta E$   |
|-----------------|--------------|
| <b>6b-Cs-C1</b> | -767.5017852 |
| <b>6b-Cs-C6</b> | -767.4974734 |
| <b>6b-Cs-C7</b> | -767.495785  |
| <b>6b-Cs-C4</b> | -767.495432  |
| <b>6b-Cs-C9</b> | -767.4949094 |
| <b>6b-Cs-C2</b> | -767.4943543 |
| <b>6b-Cs-C8</b> | -767.4935853 |
| <b>6b-Cs-C3</b> | -767.4935853 |
| <b>6b-Cs-C5</b> | -767.4919119 |

<sup>a</sup>Energies were obtained as single points at the MN15 / def2-TZVP / SMD (DCM) level of theory based on structures optimized at the same level of theory.  $\Delta E$ , hartree.

#### 6b-Na Fragment F1

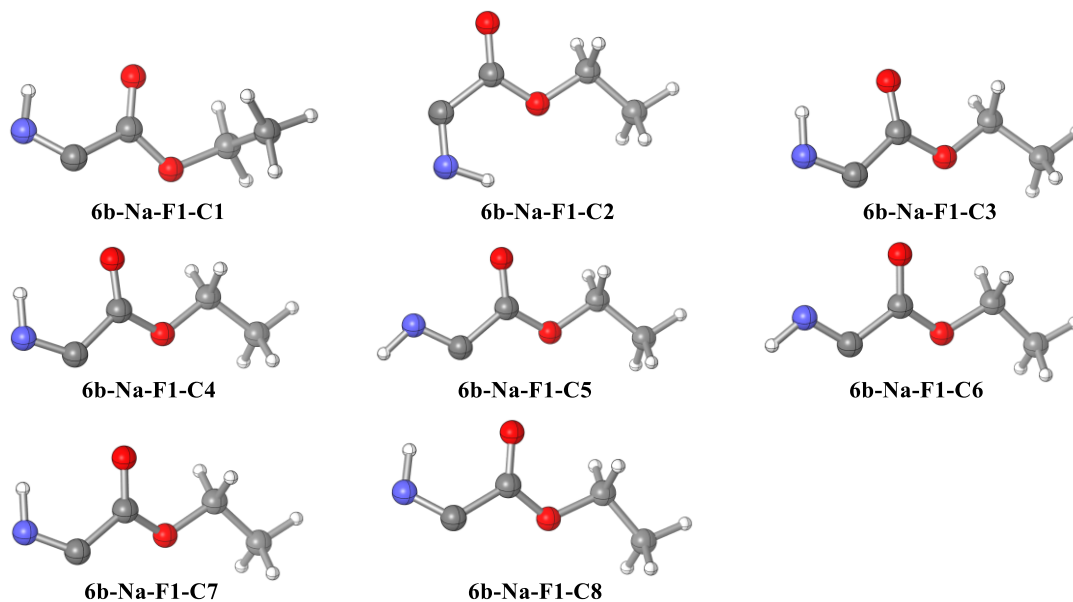

**Figure S51.** Conformers of fragment **F1** for intermediate **6b-Na**.

**Table S51.** Energies of conformers of fragment **F1** for intermediate **6b-Na**.<sup>a</sup>

| Structure | $\Delta E$   |
|-----------|--------------|
| 6b-Na-C5  | -360.8931161 |
| 6b-Na-C6  | -360.8929365 |
| 6b-Na-C4  | -360.8898244 |
| 6b-Na-C8  | -360.889313  |
| 6b-Na-C1  | -360.8891442 |
| 6b-Na-C7  | -360.8887943 |
| 6b-Na-C2  | -360.8885236 |
| 6b-Na-C3  | -360.8883351 |

<sup>a</sup>Energies were obtained as single points at the MN15 / def2-TZVP / SMD (DCM) level of theory based on structures optimized at the same level of theory.  $\Delta E$ , hartree.

### 6b-Na Fragment F2

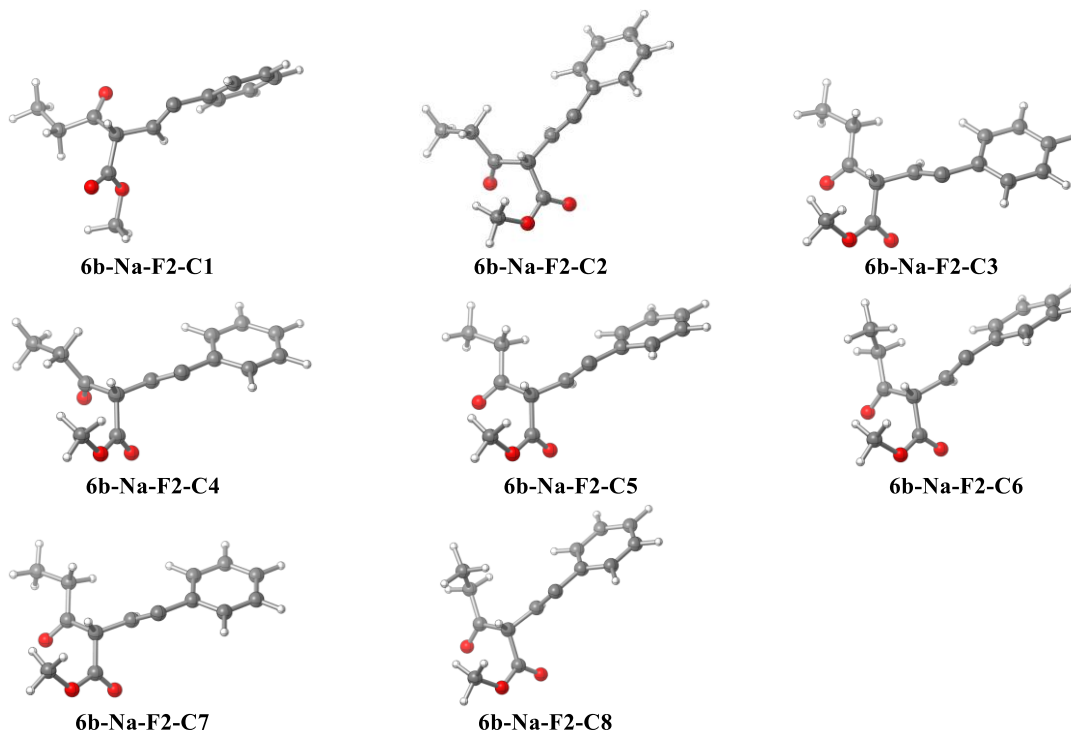

**Figure S52.** Conformers of fragment **F2** for intermediate **6b-Na**.

**Table S52.** Energies of conformers fragment **F2** for intermediate **6b-Na**. <sup>a</sup>

| Structure       | $\Delta E$   |
|-----------------|--------------|
| <b>6b-Na-C1</b> | -767.5020854 |
| <b>6b-Na-C5</b> | -767.4974223 |
| <b>6b-Na-C6</b> | -767.4959084 |
| <b>6b-Na-C2</b> | -767.4951958 |
| <b>6b-Na-C8</b> | -767.4948013 |
| <b>6b-Na-C7</b> | -767.4941417 |
| <b>6b-Na-C3</b> | -767.4929534 |
| <b>6b-Na-C4</b> | -767.4896099 |

<sup>a</sup>Energies were obtained as single points at the MN15 / def2-TZVP / SMD (DCM) level of theory based on structures optimized at the same level of theory.  $\Delta E$ , hartree.

**TSB-K-T Fragment F1**

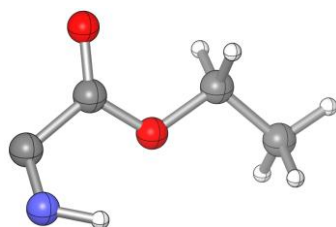

**TSB-K-T-F1-C1**

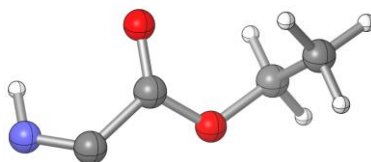

**TSB-K-T-F1-C2**

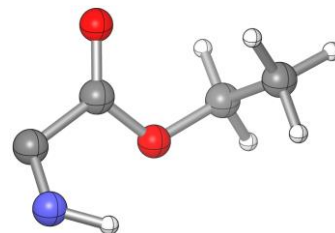

**TSB-K-T-F1-C3**

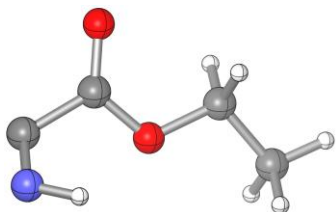

**TSB-K-T-F1-C4**

**Figure S53.** Conformers of fragment **F1** for transition state **TSB-K-T**.

**Table S53.** Energies of conformers of fragment **F1** for transition state **TSB-K-T**. <sup>a</sup>

| Structure         | $\Delta E$   |
|-------------------|--------------|
| <b>TSB-K-T-C2</b> | -360.8870855 |
| <b>TSB-K-T-C1</b> | -360.8853292 |

|                   |              |
|-------------------|--------------|
| <b>TSB-K-T-C4</b> | -360.8852605 |
| <b>TSB-K-T-C3</b> | -360.8850094 |

<sup>a</sup>Energies were obtained as single points at the MN15 / def2-TZVP / SMD (DCM) level of theory based on structures optimized at the same level of theory.  $\Delta E$ , hartree.

#### TSB-K-T Fragment F2

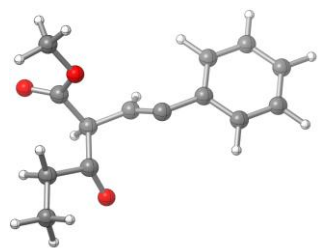

**TSB-K-T-F2-C1**

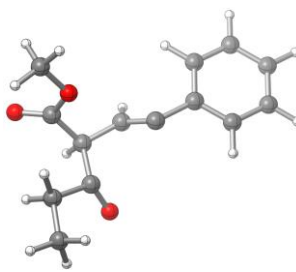

**TSB-K-T-F2-C2**

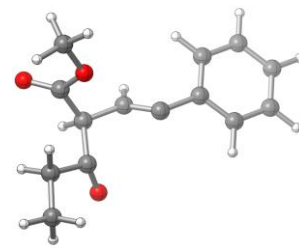

**TSB-K-T-F2-C3**

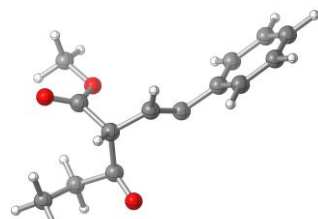

**TSB-K-T-F2-C4**

**Figure S54.** Conformers of fragment **F2** for transition state **TSB-K-T**.

**Table S54.** Energies of conformers of fragment **F2** for transition state **TSB-K-T**.<sup>a</sup>

| <b>Structure</b>  | <b><math>\Delta E</math></b> |
|-------------------|------------------------------|
| <b>TSB-K-T-C4</b> | -767.4693553                 |
| <b>TSB-K-T-C3</b> | -767.4692234                 |
| <b>TSB-K-T-C1</b> | -767.4690992                 |
| <b>TSB-K-T-C2</b> | -767.468291                  |

<sup>a</sup>Energies were obtained as single points at the MN15 / def2-TZVP / SMD (DCM) level of theory based on structures optimized at the same level of theory.  $\Delta E$ , hartree.

### TSB-K-C Fragment F1

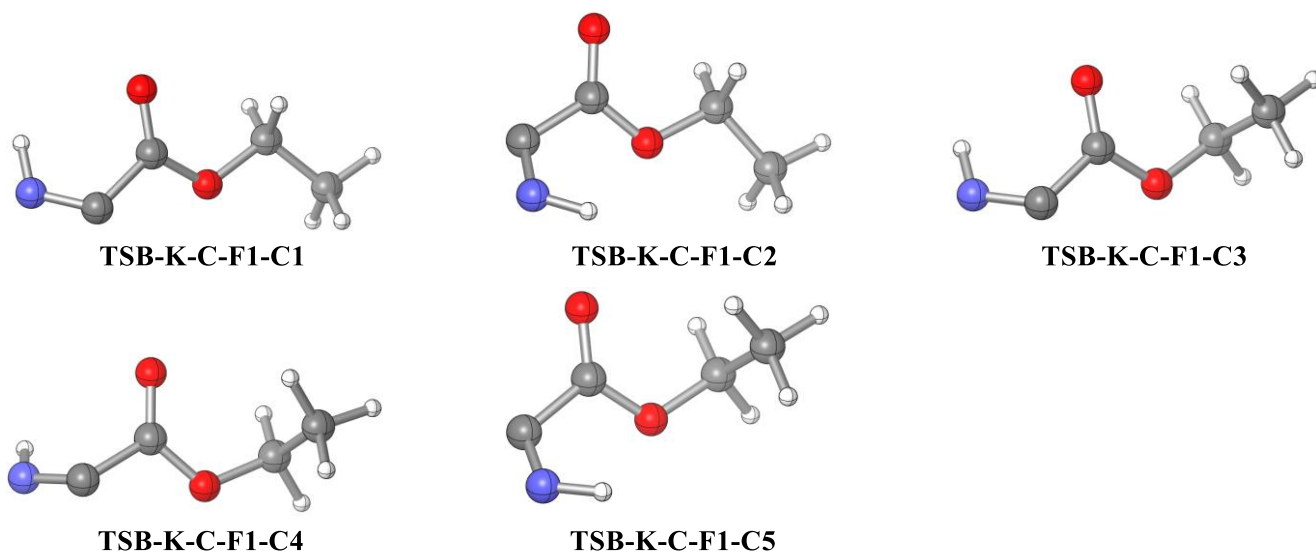

**Figure S55.** Conformers of fragment **F1** for transition state **TSB-K-C**.

**Table S55.** Energies of conformers of fragment **F1** for transition state **TSB-K-C**.<sup>a</sup>

| Structure  | $\Delta E$   |
|------------|--------------|
| TSB-K-C-C4 | -360.888161  |
| TSB-K-C-C3 | -360.8866489 |
| TSB-K-C-C1 | -360.8861748 |
| TSB-K-C-C5 | -360.8858119 |
| TSB-K-C-C2 | -360.8849229 |

<sup>a</sup>Energies were obtained as single points at the MN15 / def2-TZVP / SMD (DCM) level of theory based on structures optimized at the same level of theory.  $\Delta E$ , hartree.



## TSB-K-C Fragment F2

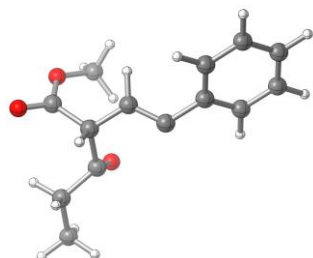

**TSB-K-C-F2-C1**

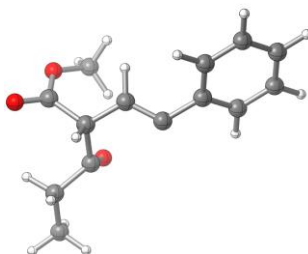

**TSB-K-C-F2-C2**

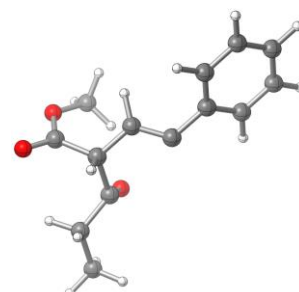

**TSB-K-C-F2-C3**

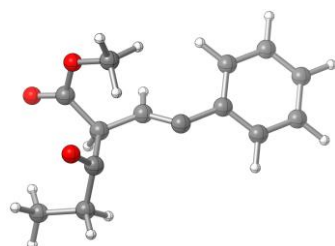

**TSB-K-C-F2-C4**

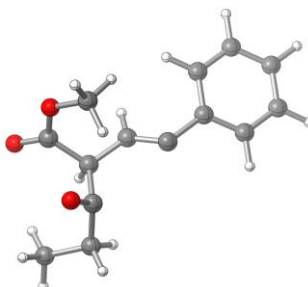

**TSB-K-C-F2-C5**

**Figure S56.** Conformers of fragment **F2** for transition state **TSB-K-C**.

**Table S56.** Energies of conformers of fragment **F2** for transition state **TSB-K-C**.<sup>a</sup>

| Structure         | $\Delta E$   |
|-------------------|--------------|
| <b>TSB-K-C-C5</b> | -767.4609139 |
| <b>TSB-K-C-C4</b> | -767.46032   |
| <b>TSB-K-C-C1</b> | -767.4594254 |
| <b>TSB-K-C-C3</b> | -767.4592898 |
| <b>TSB-K-C-C2</b> | -767.4588573 |

<sup>a</sup>Energies were obtained as single points at the MN15 / def2-TZVP / SMD (DCM) level of theory based on structures optimized at the same level of theory.  $\Delta E$ , hartree.

### TSB-E-T Fragment F1

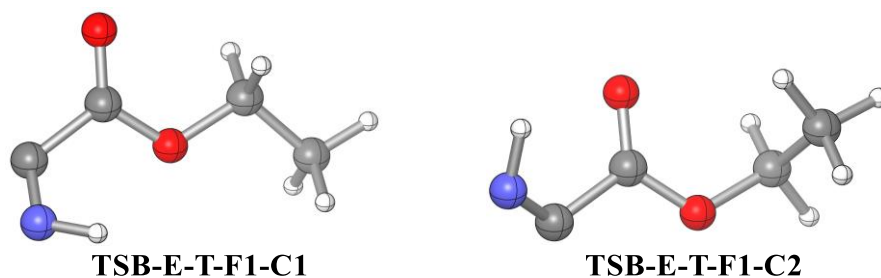

**Figure S57.** Conformers of fragment **F1** for transition state **TSB-E-T**.

**Table S57.** Energies of conformers of fragment **F1** for transition state **TSB-E-T**.<sup>a</sup>

| Structure         | $\Delta E$   |
|-------------------|--------------|
| <b>TSB-E-T-C1</b> | -360.8866259 |
| <b>TSB-E-T-C2</b> | -360.8863391 |

<sup>a</sup>Energies were obtained as single points at the MN15 / def2-TZVP / SMD (DCM) level of theory based on structures optimized at the same level of theory.  $\Delta E$ , hartree.

### TSB-E-T Fragment F2

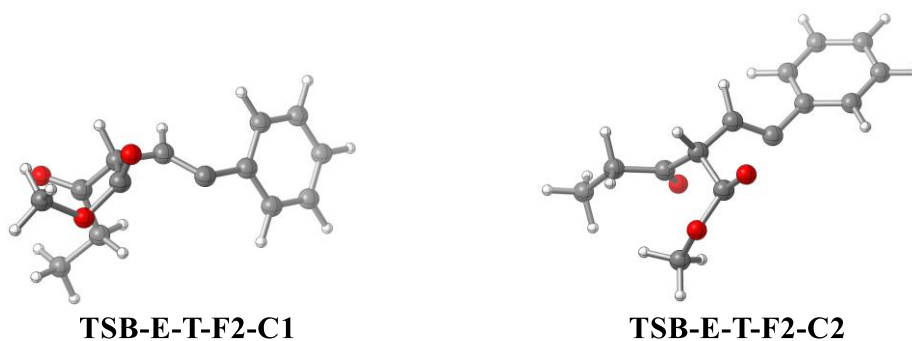

**Figure S58.** Conformers of fragment **F2** for transition state **TSB-E-T**.

**Table S58.** Energies of conformers of fragment **F2** for transition state **TSB-E-T**.<sup>a</sup>

| Structure         | $\Delta E$   |
|-------------------|--------------|
| <b>TSB-E-T-C1</b> | -767.4618329 |
| <b>TSB-E-T-C2</b> | -767.4522743 |

<sup>a</sup>Energies were obtained as single points at the MN15 / def2-TZVP / SMD (DCM) level of theory based on structures optimized at the same level of theory.  $\Delta E$ , hartree.

### TSB-E-C Fragment F1

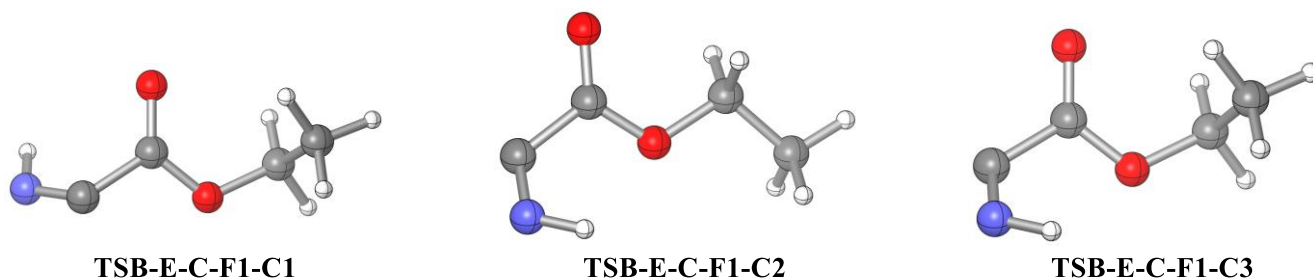

**Figure S59.** Conformers of fragment **F1** for transition state **TSB-E-C**.

**Table S59.** Energies of conformers of fragment **F1** for transition state **TSB-E-C**. <sup>a</sup>

| Structure  | $\Delta E$   |
|------------|--------------|
| TSB-E-C-C1 | -360.8894664 |
| TSB-E-C-C2 | -360.8876299 |
| TSB-E-C-C3 | -360.8873482 |

<sup>a</sup>Energies were obtained as single points at the MN15 / def2-TZVP / SMD (DCM) level of theory based on structures optimized at the same level of theory.  $\Delta E$ , hartree.

### TSB-E-C Fragment F2

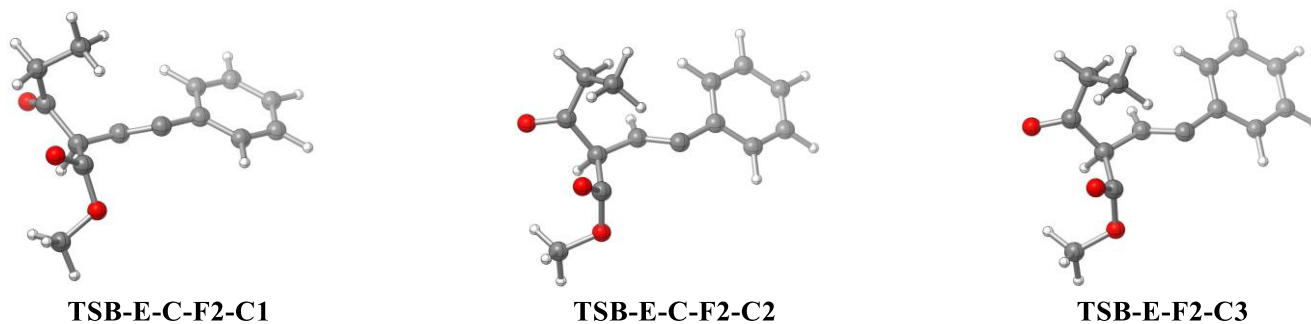

**Figure S60.** Conformers of fragment **F2** for transition state **TSB-E-C**.

**Table S60.** Energies of conformers of fragment **F2** for transition state **TSB-E-C**. <sup>a</sup>

| Structure  | $\Delta E$   |
|------------|--------------|
| TSB-E-C-C3 | -767.457268  |
| TSB-E-C-C2 | -767.4572525 |
| TSB-E-C-C1 | -767.4569468 |

<sup>a</sup>Energies were obtained as single points at the MN15 / def2-TZVP / SMD (DCM) level of theory based on structures optimized at the same level of theory.  $\Delta E$ , hartree.

**TSB-Cs-K-T Fragment F1**

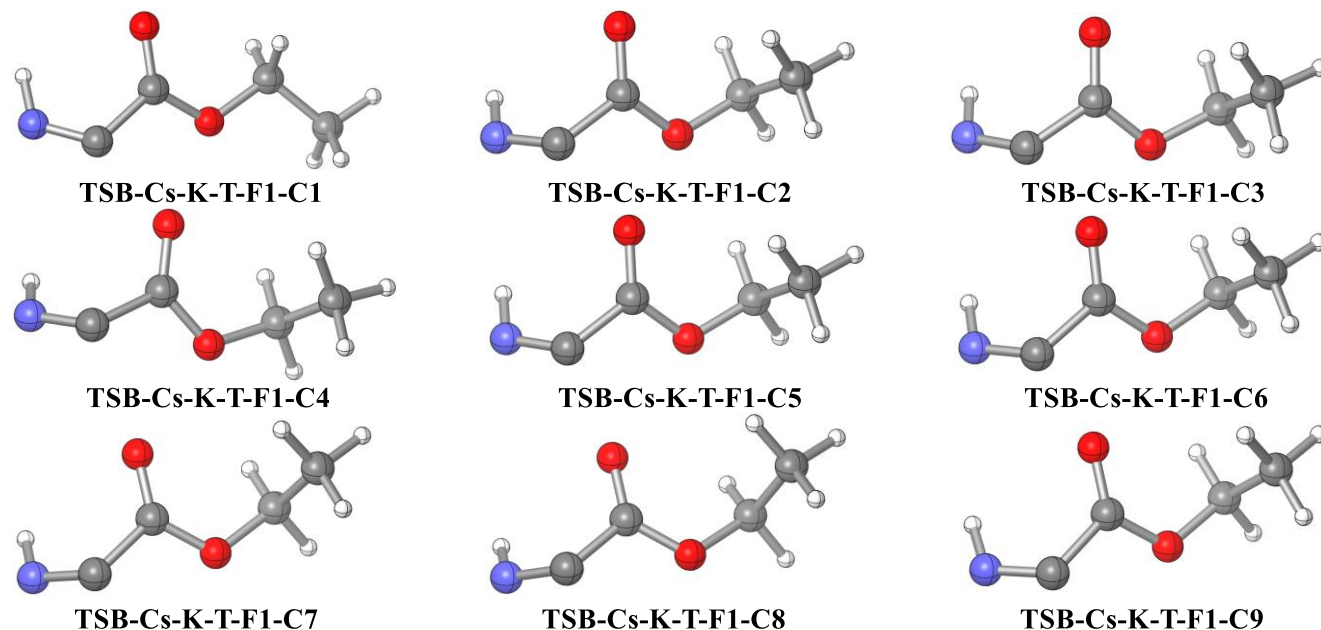

**Figure S61.** Conformers of fragment **F1** for transition state **TSB-Cs-K-T**.

**Table S61.** Energies of conformers of fragment **F1** for transition state **TSB-Cs-K-T**.<sup>a</sup>

| Structure     | $\Delta E$   |
|---------------|--------------|
| TSB-Cs-K-T-C1 | -360.8890472 |
| TSB-Cs-K-T-C4 | -360.8884158 |
| TSB-Cs-K-T-C3 | -360.8882955 |
| TSB-Cs-K-T-C5 | -360.8876659 |
| TSB-Cs-K-T-C2 | -360.8876348 |
| TSB-Cs-K-T-C9 | -360.8875916 |
| TSB-Cs-K-T-C6 | -360.887549  |
| TSB-Cs-K-T-C7 | -360.8870643 |
| TSB-Cs-K-T-C8 | -360.8866972 |

<sup>a</sup>Energies were obtained as single points at the MN15 / def2-TZVP / SMD (DCM) level of theory based on structures optimized at the same level of theory.  $\Delta E$ , hartree.

**TSB-Cs-K-T Fragment F2**

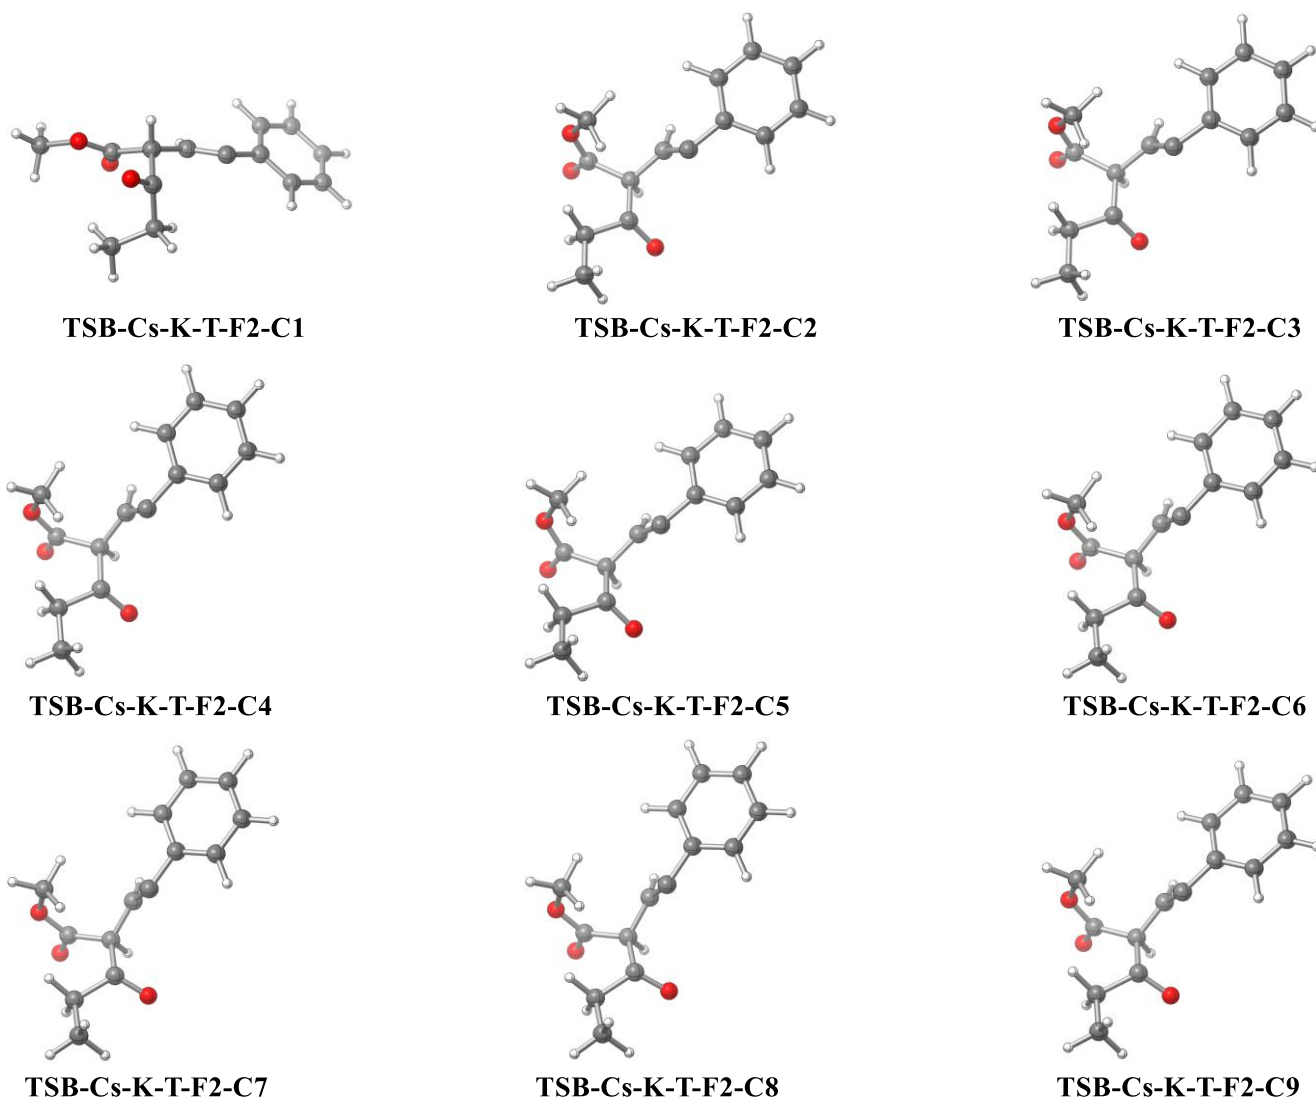

**Figure S62.** Conformers of fragment **F2** for transition state **TSB-Cs-K-T**.

**Table S62.** Energies of conformers of fragment **F2** for transition state **TSB-Cs-K-T**.<sup>a</sup>

| Structure            | $\Delta E$   |
|----------------------|--------------|
| <b>TSB-Cs-K-T-C1</b> | -767.4793681 |
| <b>TSB-Cs-K-T-C3</b> | -767.4641035 |
| <b>TSB-Cs-K-T-C2</b> | -767.4625831 |
| <b>TSB-Cs-K-T-C4</b> | -767.4610787 |
| <b>TSB-Cs-K-T-C5</b> | -767.459925  |

|                      |              |
|----------------------|--------------|
| <b>TSB-Cs-K-T-C7</b> | -767.4593369 |
| <b>TSB-Cs-K-T-C6</b> | -767.4590215 |
| <b>TSB-Cs-K-T-C8</b> | -767.457707  |
| <b>TSB-Cs-K-T-C9</b> | -767.4565832 |

<sup>a</sup>Energies were obtained as single points at the MN15 / def2-TZVP / SMD (DCM) level of theory based on structures optimized at the same level of theory.  $\Delta E$ , hartree.

#### TSB-Cs-K-C Fragment F1

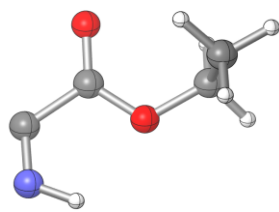

**TSB-Cs-K-C-F1-C1**

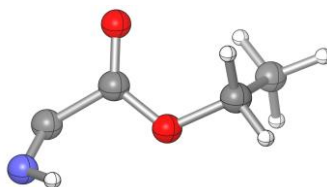

**TSB-Cs-K-C-F1-C2**

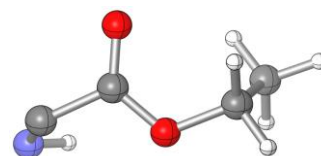

**TSB-Cs-K-C-F1-C3**

**Figure S63.** Conformers of fragment **F1** for transition state **TSB-Cs-K-C**.

**Table S63.** Energies of conformers of fragment **F1** for transition state **TSB-Cs-K-C**.<sup>a</sup>

| <b>Structure</b>     | <b><math>\Delta E</math></b> |
|----------------------|------------------------------|
| <b>TSB-Cs-K-C-C2</b> | -360.8858021                 |
| <b>TSB-Cs-K-C-C1</b> | -360.8854029                 |
| <b>TSB-Cs-K-C-C3</b> | -360.8853893                 |

<sup>a</sup>Energies were obtained as single points at the MN15 / def2-TZVP / SMD (DCM) level of theory based on structures optimized at the same level of theory.  $\Delta E$ , hartree.

#### TSB-Cs-K-C Fragment F2

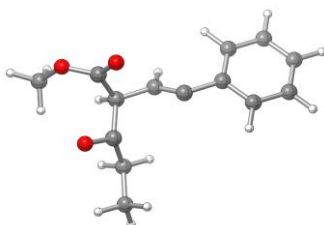

**TSB-Cs-K-C-F2-C1**

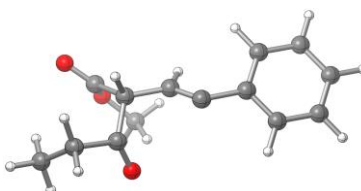

**TSB-Cs-K-C-F2-C2**

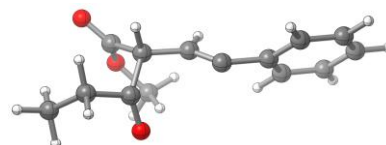

**TSB-Cs-K-C-F2-C3**

**Figure S64.** Conformers of fragment **F2** for transition state **TSB-Cs-K-C**.

**Table S64.** Energies of conformers of fragment **F2** for transition state **TSB-Cs-K-C**.<sup>a</sup>

| Structure     | $\Delta E$   |
|---------------|--------------|
| TSB-Cs-K-C-C1 | -767.4654485 |
| TSB-Cs-K-C-C2 | -767.4651693 |
| TSB-Cs-K-C-C3 | -767.4621897 |

<sup>a</sup>Energies were obtained as single points at the MN15 / def2-TZVP / SMD (DCM) level of theory based on structures optimized at the same level of theory.  $\Delta E$ , hartree.

#### TSB-Cs-E-T Fragment F1

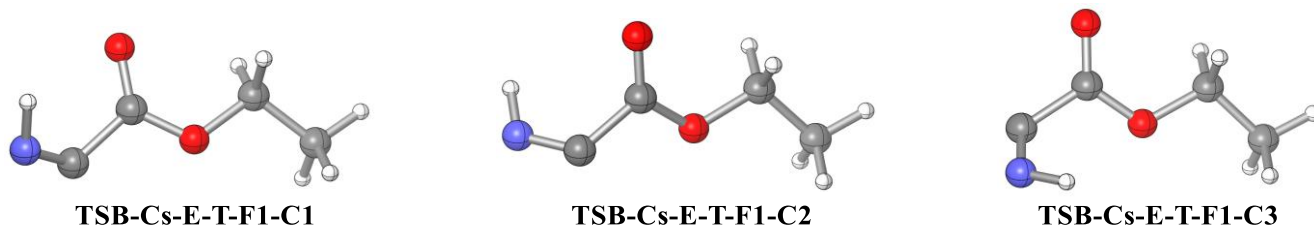

**Figure S65.** Conformers of fragment **F1** for transition state **TSB-Cs-E-T**.

**Table S65.** Energies of conformers of fragment **F1** for transition state **TSB-Cs-E-T**.<sup>a</sup>

| Structure     | $\Delta E$   |
|---------------|--------------|
| TSB-Cs-E-T-C2 | -360.8881578 |
| TSB-Cs-E-T-C1 | -360.8878187 |
| TSB-Cs-E-T-C3 | -360.8868463 |

<sup>a</sup>Energies were obtained as single points at the MN15 / def2-TZVP / SMD (DCM) level of theory based on structures optimized at the same level of theory.  $\Delta E$ , hartree.

### TSB-Cs-E-T Fragment F2

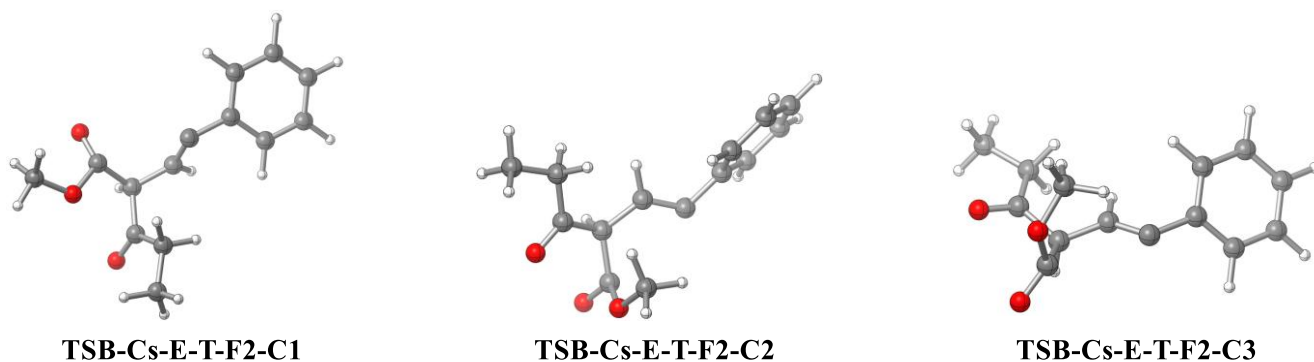

**Figure S66.** Conformers of fragment **F2** for transition state **TSB-Cs-E-T**.

**Table S66.** Energies of conformers of fragment **F2** for transition state **TSB-Cs-E-T**.<sup>a</sup>

| Structure     | $\Delta E$   |
|---------------|--------------|
| TSB-Cs-E-T-C1 | -767.4677878 |
| TSB-Cs-E-T-C3 | -767.4618319 |
| TSB-Cs-E-T-C2 | -767.4615093 |

<sup>a</sup>Energies were obtained as single points at the MN15 / def2-TZVP / SMD (DCM) level of theory based on structures optimized at the same level of theory.  $\Delta E$ , hartree.

### TSB-Cs-E-C Fragment F1

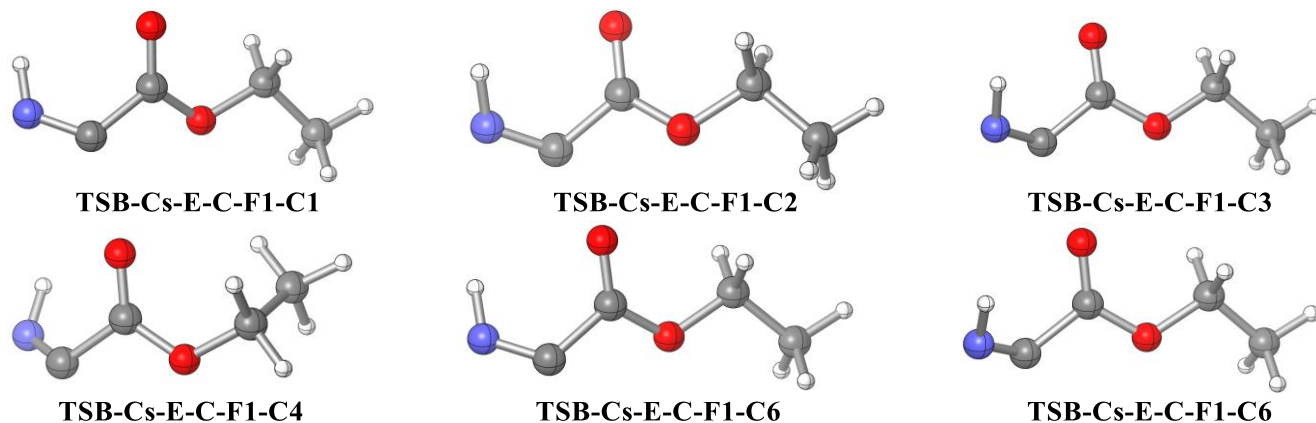

**Figure S67.** Conformers of fragment **F1** for transition state **TSB-Cs-E-C**.



**Table S67.** Energies of conformers of fragment **F1** for transition state **TSB-Cs-E-C**.<sup>a</sup>

| Structure            | $\Delta E$   |
|----------------------|--------------|
| <b>TSB-Cs-E-C-C6</b> | -360.8885666 |
| <b>TSB-Cs-E-C-C1</b> | -360.8878381 |
| <b>TSB-Cs-E-C-C4</b> | -360.8877311 |
| <b>TSB-Cs-E-C-C5</b> | -360.8877224 |
| <b>TSB-Cs-E-C-C2</b> | -360.8875087 |

<sup>a</sup>Energies were obtained as single points at the MN15 / def2-TZVP / SMD (DCM) level of theory based on structures optimized at the same level of theory.  $\Delta E$ , hartree.

**TSB-Cs-E-C Fragment F2**

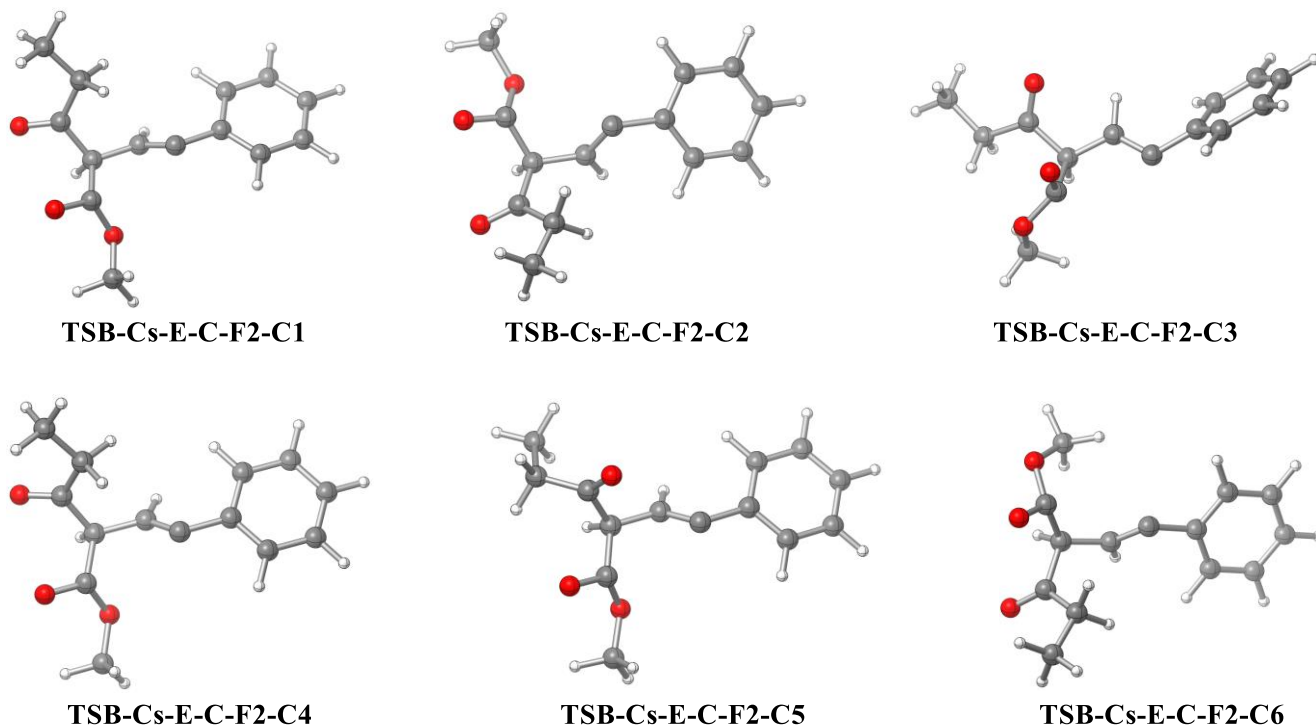

**Figure S68.** Conformers of fragment **F2** for transition state **TSB-Cs-E-C**.

**Table S68.** Energies of conformers of fragment **F2** for transition state **TSB-Cs-E-C**.<sup>a</sup>

| Structure            | $\Delta E$   |
|----------------------|--------------|
| <b>TSB-Cs-E-C-C6</b> | -767.466413  |
| <b>TSB-Cs-E-C-C5</b> | -767.4637485 |

|                      |              |
|----------------------|--------------|
| <b>TSB-Cs-E-C-C4</b> | -767.4635251 |
| <b>TSB-Cs-E-C-C1</b> | -767.4628295 |
| <b>TSB-Cs-E-C-C2</b> | -767.4626709 |

<sup>a</sup>Energies were obtained as single points at the MN15 / def2-TZVP / SMD (DCM) level of theory based on structures optimized at the same level of theory.  $\Delta E$ , hartree.

#### TSB-Na-K-T Fragment F1

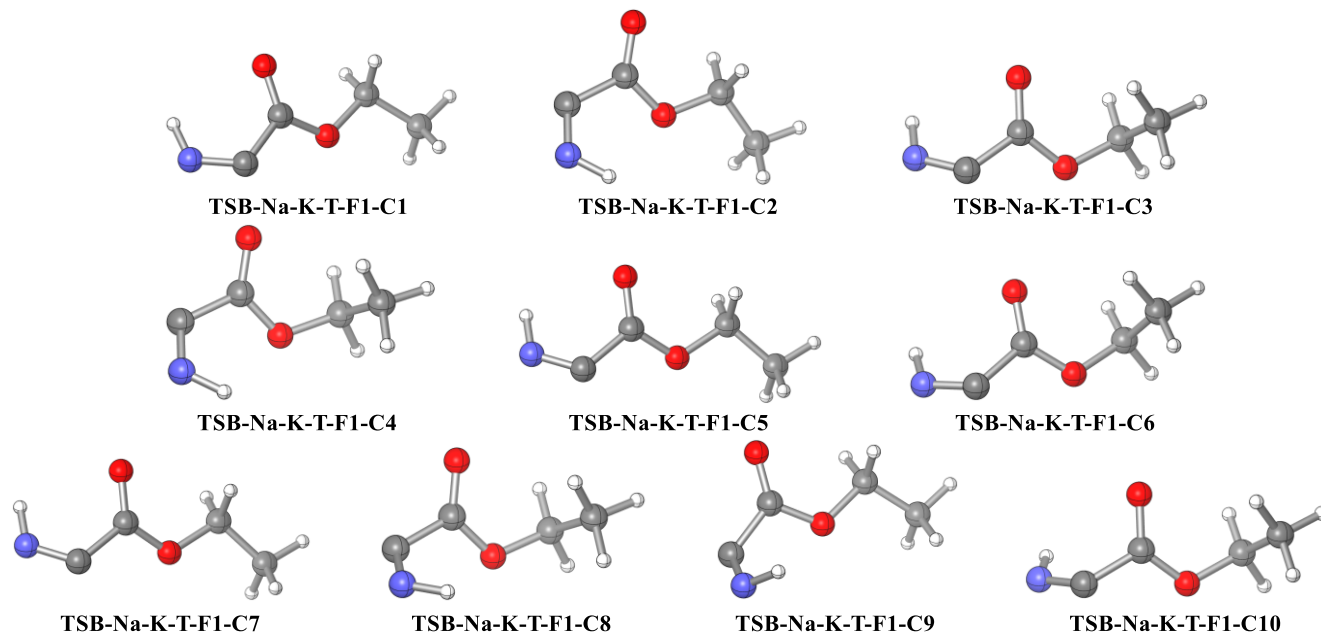

**Figure S69.** Conformers of fragment **F1** for transition state **TSB-Na-K-T**.

**Table S69.** Energies of conformers of fragment **F1** for transition state **TSB-Na-K-T**.<sup>a</sup>

| <b>Structure</b>     | <b><math>\Delta E</math></b> |
|----------------------|------------------------------|
| <b>TSB-Na-K-T-C3</b> | -360.8898057                 |
| <b>TSB-Na-K-T-C6</b> | -360.8897817                 |
| <b>TSB-Na-K-T-C7</b> | -360.889501                  |
| <b>TSB-Na-K-T-C5</b> | -360.8892917                 |
| <b>TSB-Na-K-T-C1</b> | -360.8892682                 |
| <b>TSB-Na-K-T-C2</b> | -360.8876763                 |
| <b>TSB-Na-K-T-C4</b> | -360.8874357                 |
| <b>TSB-Na-K-T-C8</b> | -360.8867019                 |

|                       |              |
|-----------------------|--------------|
| <b>TSB-Na-K-T-C9</b>  | -360.8858274 |
| <b>TSB-Na-K-T-C10</b> | -360.885262  |

<sup>a</sup>Energies were obtained as single points at the MN15 / def2-TZVP / SMD (DCM) level of theory based on structures optimized at the same level of theory.  $\Delta E$ , hartree.

### TSB-Na-K-T Fragment F2

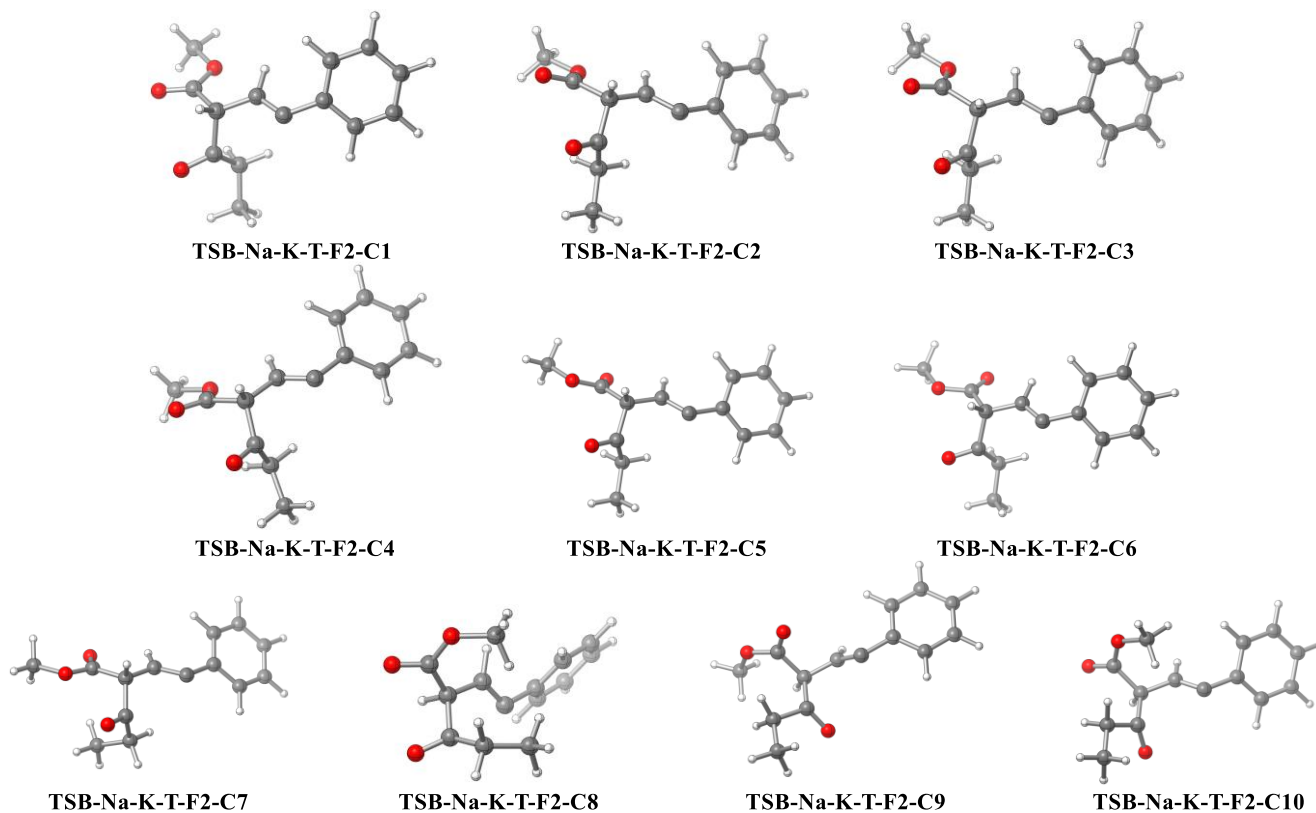

**Figure S70.** Conformers of fragment **F2** for transition state **TSB-Na-K-T**.

**Table S70.** Energies of conformers of fragment **F2** for transition state **TSB-Na-K-T**.<sup>a</sup>

| <b>Structure</b>     | <b><math>\Delta E</math></b> |
|----------------------|------------------------------|
| <b>TSB-Na-K-T-C7</b> | -767.483619                  |
| <b>TSB-Na-K-T-C6</b> | -767.4829992                 |
| <b>TSB-Na-K-T-C5</b> | -767.4825825                 |
| <b>TSB-Na-K-T-C3</b> | -767.4807686                 |
| <b>TSB-Na-K-T-C4</b> | -767.4804792                 |
| <b>TSB-Na-K-T-C2</b> | -767.4800816                 |

|                       |              |
|-----------------------|--------------|
| <b>TSB-Na-K-T-C1</b>  | -767.4800435 |
| <b>TSB-Na-K-T-C9</b>  | -767.4712748 |
| <b>TSB-Na-K-T-C10</b> | -767.4634094 |
| <b>TSB-Na-K-T-C8</b>  | -767.4605217 |

<sup>a</sup>Energies were obtained as single points at the MN15 / def2-TZVP / SMD (DCM) level of theory based on structures optimized at the same level of theory.  $\Delta E$ , hartree.

#### TSB-Na-K-C Fragment F1

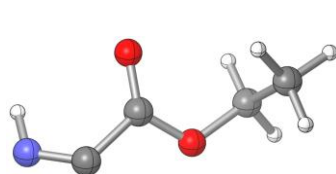

**TSB-Na-K-C-F1-C1**

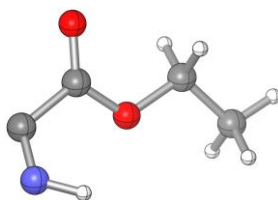

**TSB-Na-K-C-F1-C2**

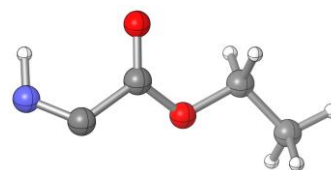

**TSB-Na-K-C-F1-C3**

**Figure S71.** Conformers of fragment **F1** for transition state **TSB-Na-K-C**.

**Table S71.** Energies of conformers of fragment **F1** for transition state **TSB-Na-K-C**.<sup>a</sup>

| <b>Structure</b>     | <b><math>\Delta E</math></b> |
|----------------------|------------------------------|
| <b>TSB-Na-K-C-C1</b> | -360.8893736                 |
| <b>TSB-Na-K-C-C3</b> | -360.8885053                 |
| <b>TSB-Na-K-C-C2</b> | -360.8879021                 |

<sup>a</sup>Energies were obtained as single points at the MN15 / def2-TZVP / SMD (DCM) level of theory based on structures optimized at the same level of theory.  $\Delta E$ , hartree.

#### TSB-Na-K-C Fragment F2

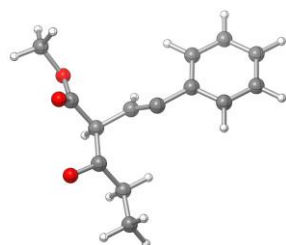

**TSB-Na-K-C-F2-C1**

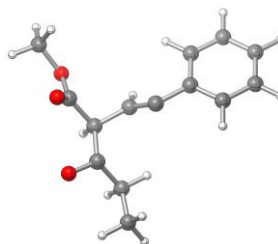

**TSB-Na-K-C-F2-C2**

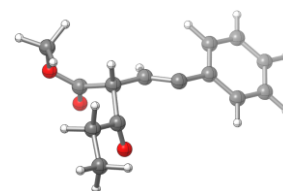

**TSB-Na-K-C-F2-C3**

**Figure S72.** Conformers of fragment **F2** for transition state **TSB-Na-K-C**.

**Table S72.** Energies of conformers of fragment **F2** for transition state **TSB-Na-K-C**.<sup>a</sup>

| Structure     | $\Delta E$   |
|---------------|--------------|
| TSB-Na-K-C-C2 | -767.4757391 |
| TSB-Na-K-C-C1 | -767.4755163 |
| TSB-Na-K-C-C3 | -767.4701713 |

<sup>a</sup>Energies were obtained as single points at the MN15 / def2-TZVP / SMD (DCM) level of theory based on structures optimized at the same level of theory.  $\Delta E$ , hartree.

**TSB-Na-E-T Fragment F1**

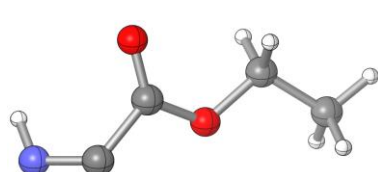

TSB-Na-E-T-F1-C1

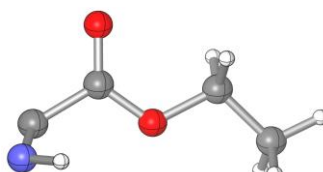

TSB-Na-E-T-F1-C2

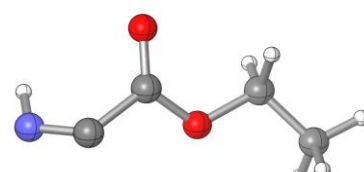

TSB-Na-E-T-F1-C3

**Figure S73.** Conformers of fragment **F1** for transition state **TSB-Na-E-T**.

**Table S73.** Energies of conformers of fragment **F1** for transition state **TSB-Na-E-T**.<sup>a</sup>

| Structure     | $\Delta E$   |
|---------------|--------------|
| TSB-Na-E-T-C1 | -360.8888639 |
| TSB-Na-E-T-C3 | -360.8886144 |
| TSB-Na-E-T-C2 | -360.8882133 |

<sup>a</sup>Energies were obtained as single points at the MN15 / def2-TZVP / SMD (DCM) level of theory based on structures optimized at the same level of theory.  $\Delta E$ , hartree.

**TSB-Na-E-T Fragment F2**

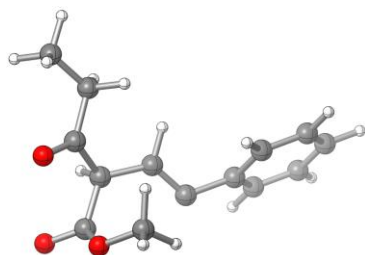

TSB-Na-E-T-F2-C1

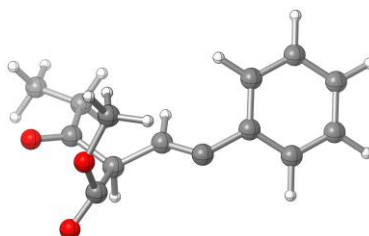

TSB-Na-E-T-F2-C2

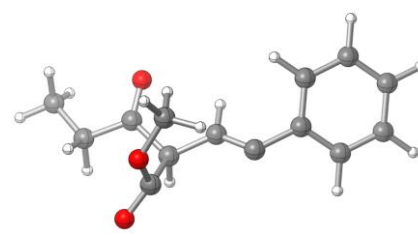

TSB-Na-E-T-F2-C3

**Figure S74.** Conformers of fragment **F2** for transition state **TSB-Na-E-T**.

**Table S74.** Energies of conformers of fragment **F2** for transition state **TSB-Na-E-T**.<sup>a</sup>

| Structure     | $\Delta E$   |
|---------------|--------------|
| TSB-Na-E-T-C3 | -767.4717853 |
| TSB-Na-E-T-C2 | -767.4678667 |
| TSB-Na-E-T-C1 | -767.4676947 |

<sup>a</sup>Energies were obtained as single points at the MN15 / def2-TZVP / SMD (DCM) level of theory based on structures optimized at the same level of theory.  $\Delta E$ , hartree.

**TSB-Na-E-C Fragment F1**

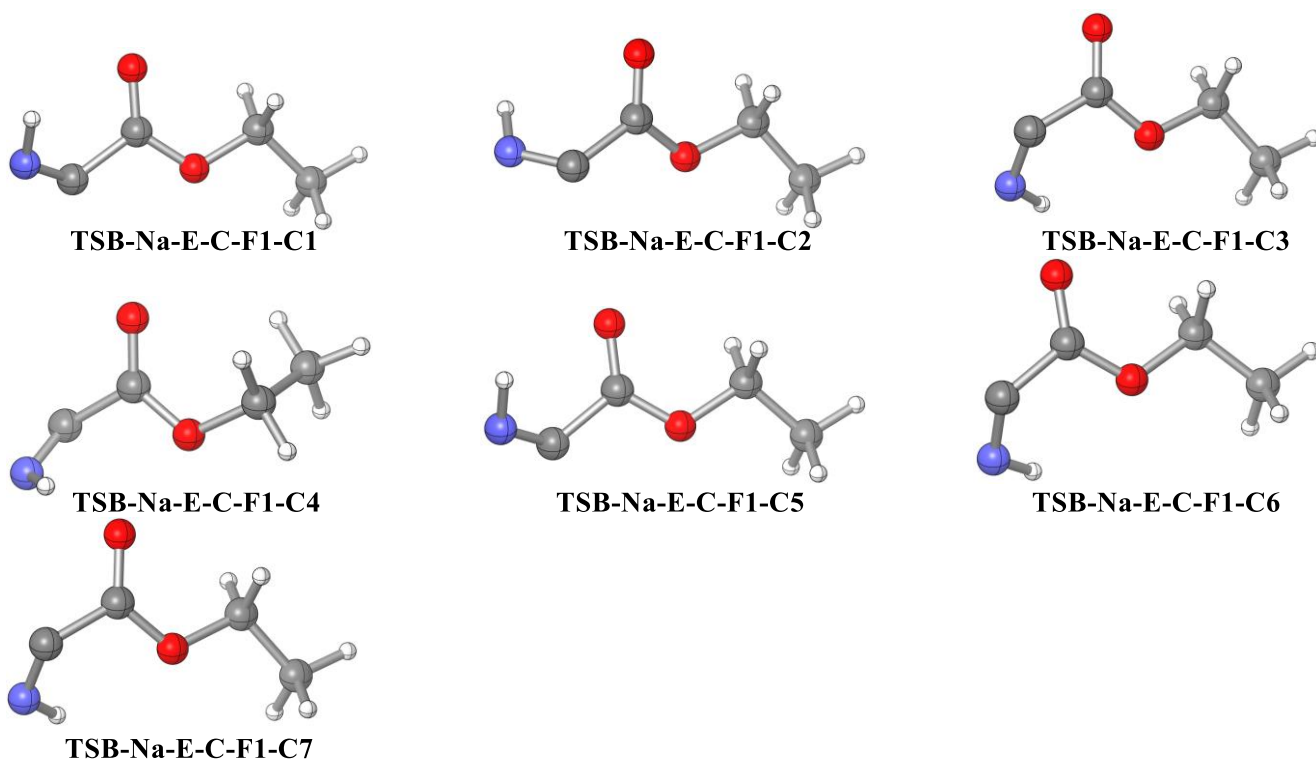

**Figure S75.** Conformers of fragment **F1** for transition state **TSB-Na-E-C**.

**Table S75.** Energies of conformers of fragment **F1** for transition state **TSB-Na-E-C**.<sup>a</sup>

| Structure   | $\Delta E$   |
|-------------|--------------|
| TSB-Na-E-C5 | -360.8893635 |
| TSB-Na-E-C1 | -360.8881534 |

|                    |              |
|--------------------|--------------|
| <b>TSB-Na-E-C2</b> | -360.8879725 |
| <b>TSB-Na-E-C7</b> | -360.8878785 |
| <b>TSB-Na-E-C6</b> | -360.8876561 |
| <b>TSB-Na-E-C3</b> | -360.8869037 |
| <b>TSB-Na-E-C4</b> | -360.8864558 |

<sup>a</sup>Energies were obtained as single points at the MN15 / def2-TZVP / SMD (DCM) level of theory based on structures optimized at the same level of theory.  $\Delta E$ , hartree.

### TSB-Na-E-C Fragment F2

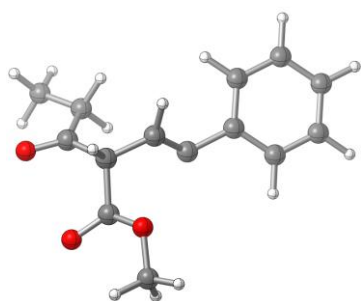

**TSB-Na-E-C-F2-C1**

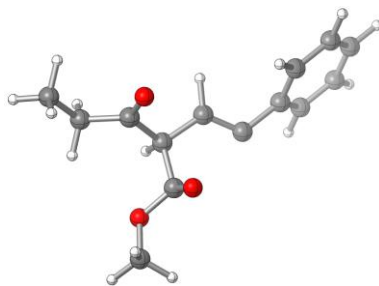

**TSB-Na-E-C-F2-C2**

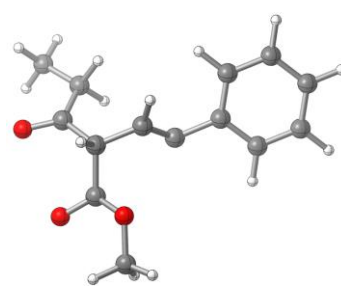

**TSB-Na-E-C-F2-C3**

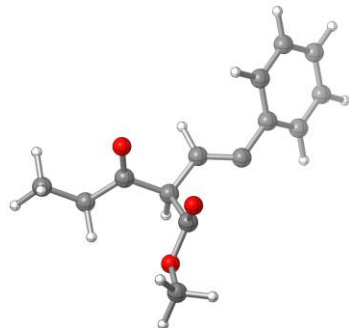

**TSB-Na-E-C-F2-C4**

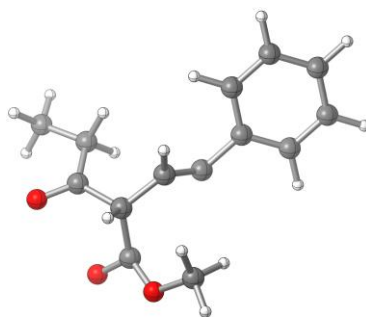

**TSB-Na-E-C-F2-C5**

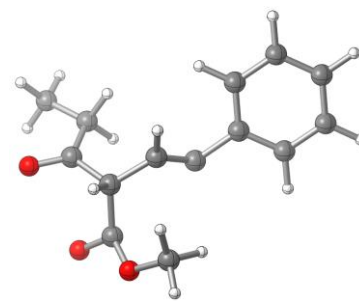

**TSB-Na-E-C-F2-C6**

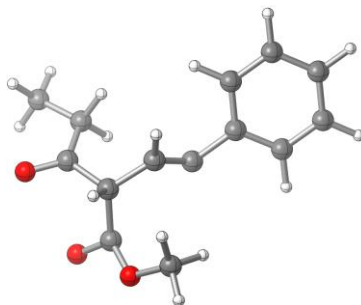

**TSB-Na-E-C-F2-C7**

**Figure S76.** Conformers of fragment **F2** for transition state **TSB-Na-E-C**.

**Table S76.** Energies of conformers of fragment **F2** for transition state **TSB-Na-E-C**.<sup>a</sup>

| Structure          | $\Delta E$   |
|--------------------|--------------|
| <b>TSB-Na-E-C4</b> | -767.4713784 |
| <b>TSB-Na-E-C2</b> | -767.4710121 |
| <b>TSB-Na-E-C1</b> | -767.4682315 |
| <b>TSB-Na-E-C3</b> | -767.4678666 |
| <b>TSB-Na-E-C6</b> | -767.4673483 |
| <b>TSB-Na-E-C7</b> | -767.4672787 |
| <b>TSB-Na-E-C5</b> | -767.4669896 |

<sup>a</sup>Energies were obtained as single points at the MN15 / def2-TZVP / SMD (DCM) level of theory based on structures optimized at the same level of theory.  $\Delta E$ , hartree.



## 9. NMR spectra

### $^1\text{H}$ -NMR (500 MHz, $\text{CDCl}_3$ ) of compound 4a

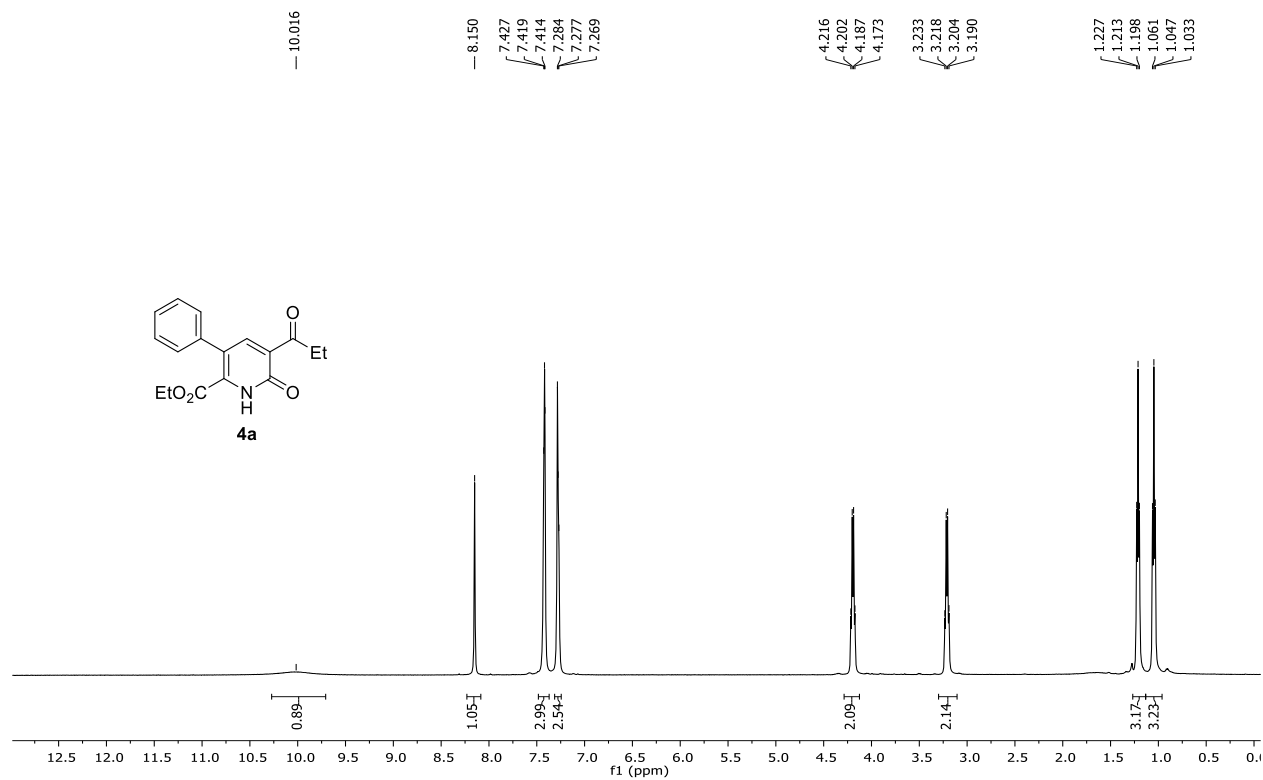

### $^{13}\text{C}$ -NMR (126 MHz, $\text{CDCl}_3$ ) of compound 4a

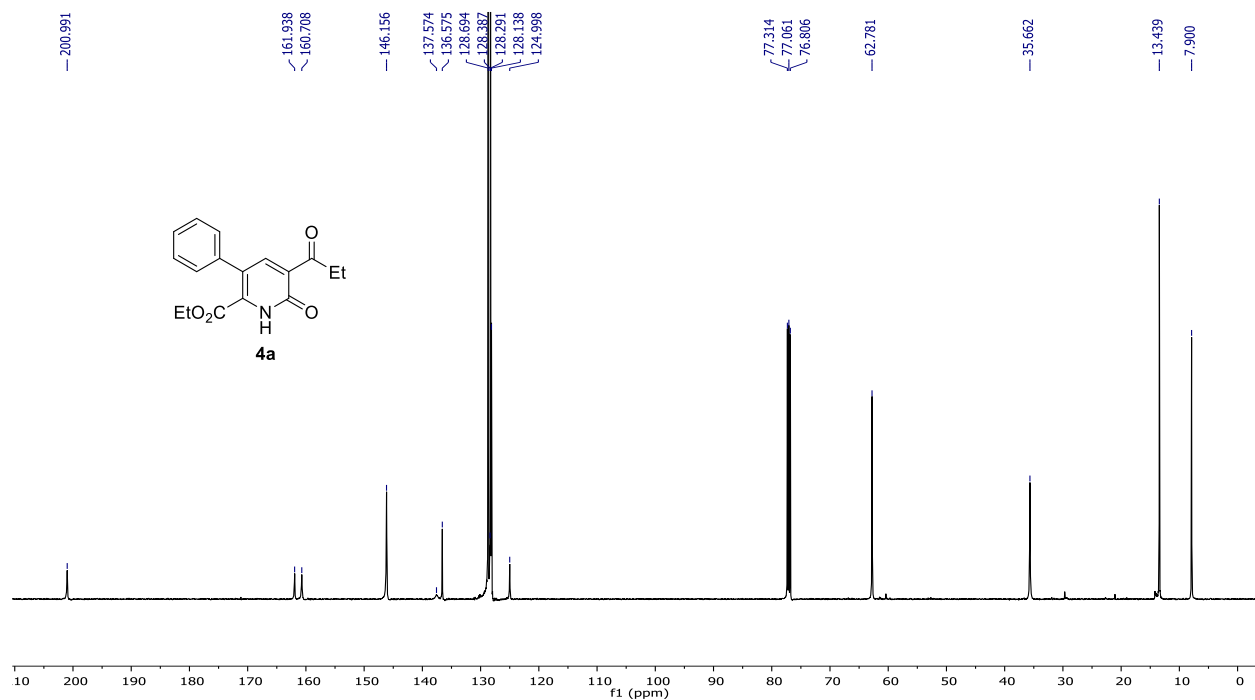

**$^1\text{H}$ -NMR (500 MHz,  $\text{CDCl}_3$ ) of compound 4b**

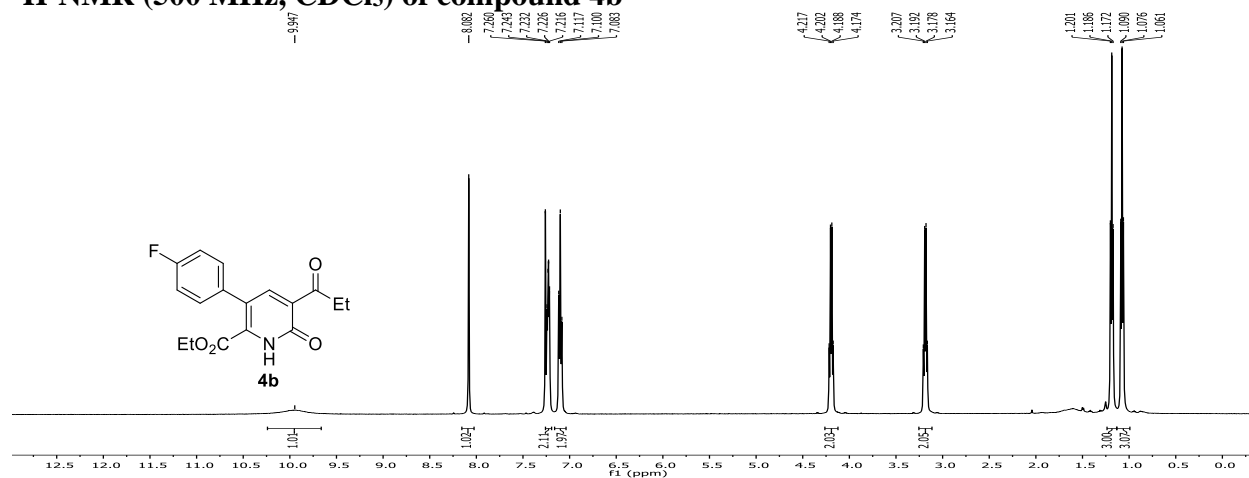

**$^{13}\text{C}$ -NMR (126 MHz,  $\text{CDCl}_3$ ) of compound 4b**

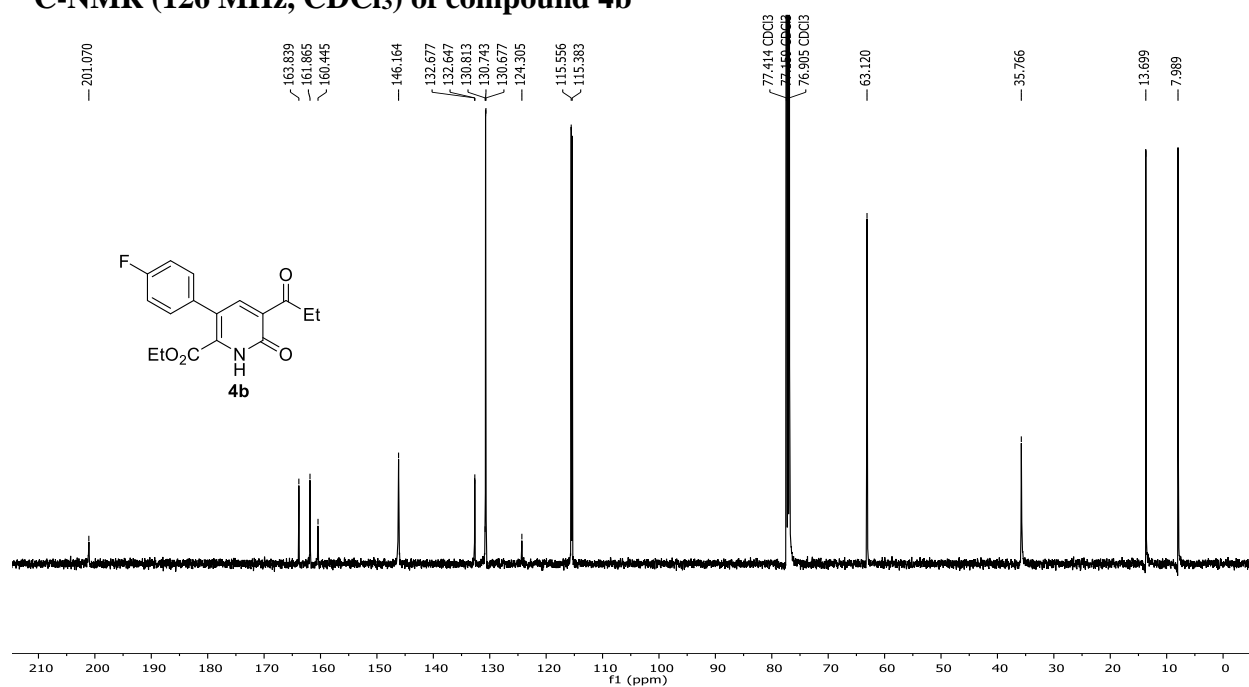

**$^{19}\text{F}$ -NMR (471 MHz,  $\text{CDCl}_3$ ) of compound 4b**

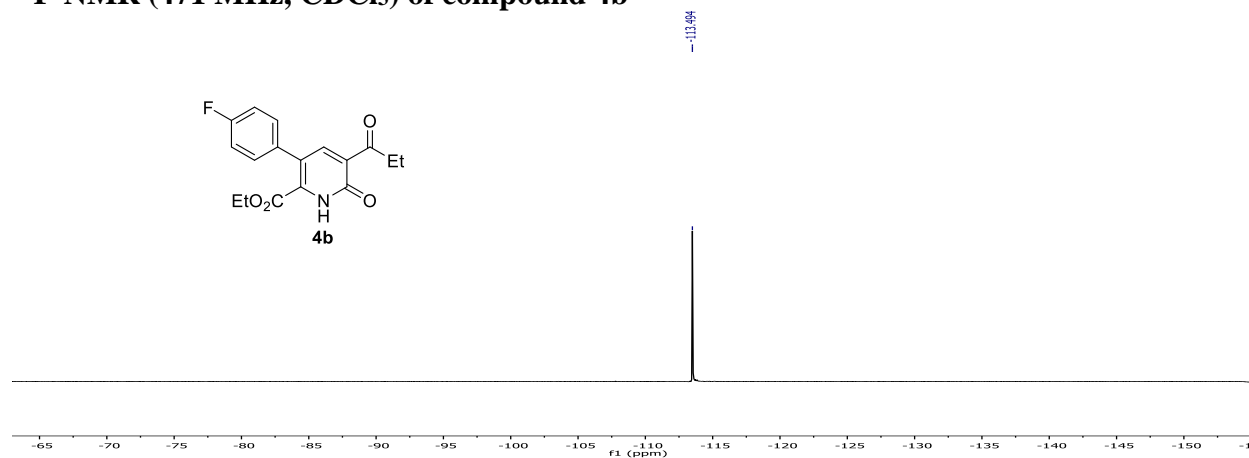

**$^1\text{H}$ -NMR (500 MHz,  $\text{CDCl}_3$ ) of compound **4c****

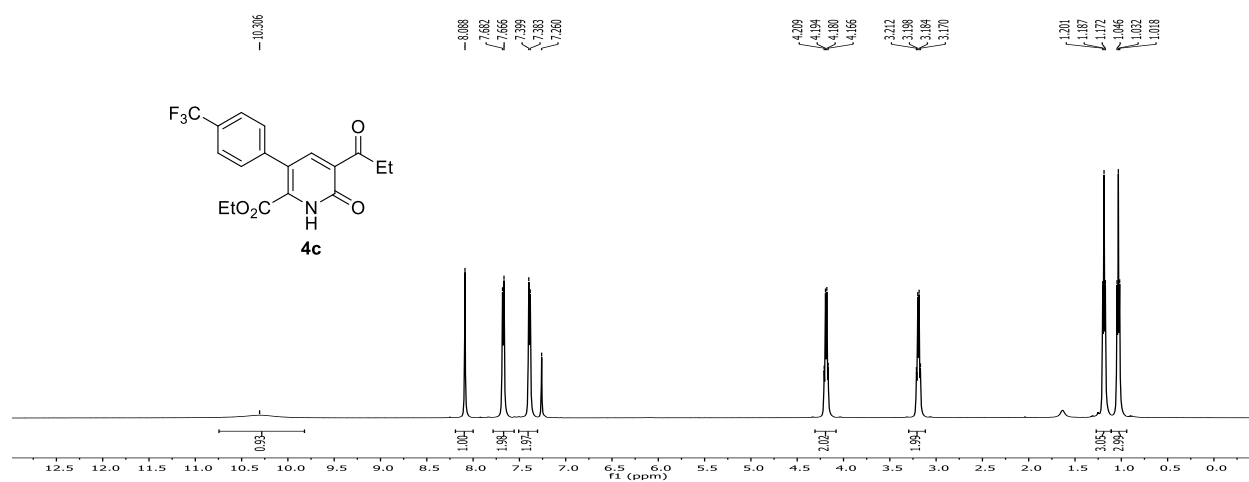

**$^{13}\text{C}$ -NMR (126 MHz,  $\text{CDCl}_3$ ) of compound **4c****

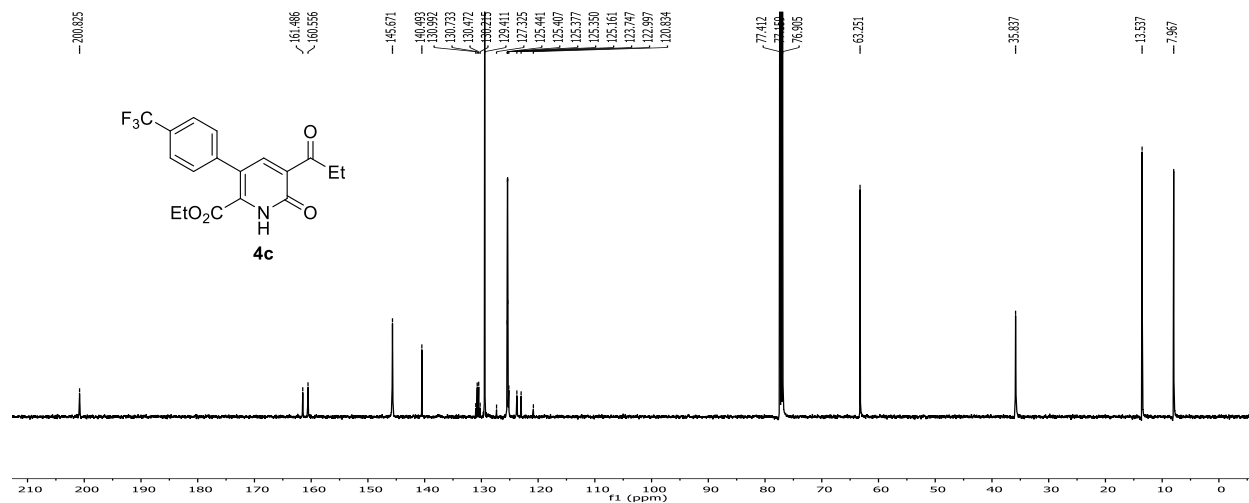

**$^{19}\text{F}$ -NMR (471 MHz,  $\text{CDCl}_3$ ) of compound **4c****

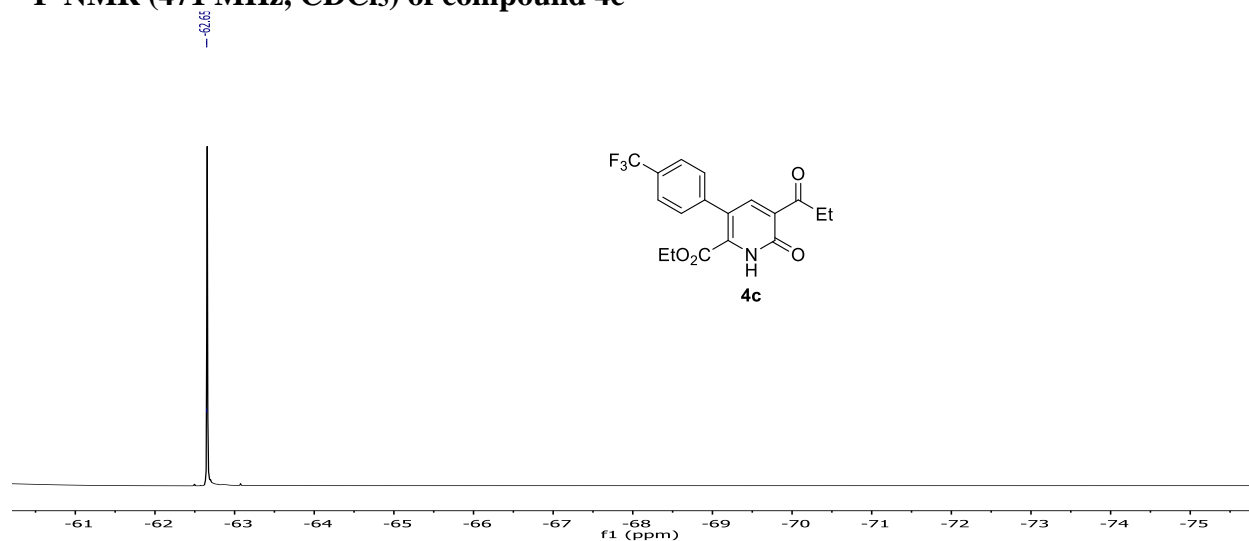

**$^1\text{H}$ -NMR (500 MHz,  $\text{CDCl}_3$ ) of compound 4d**

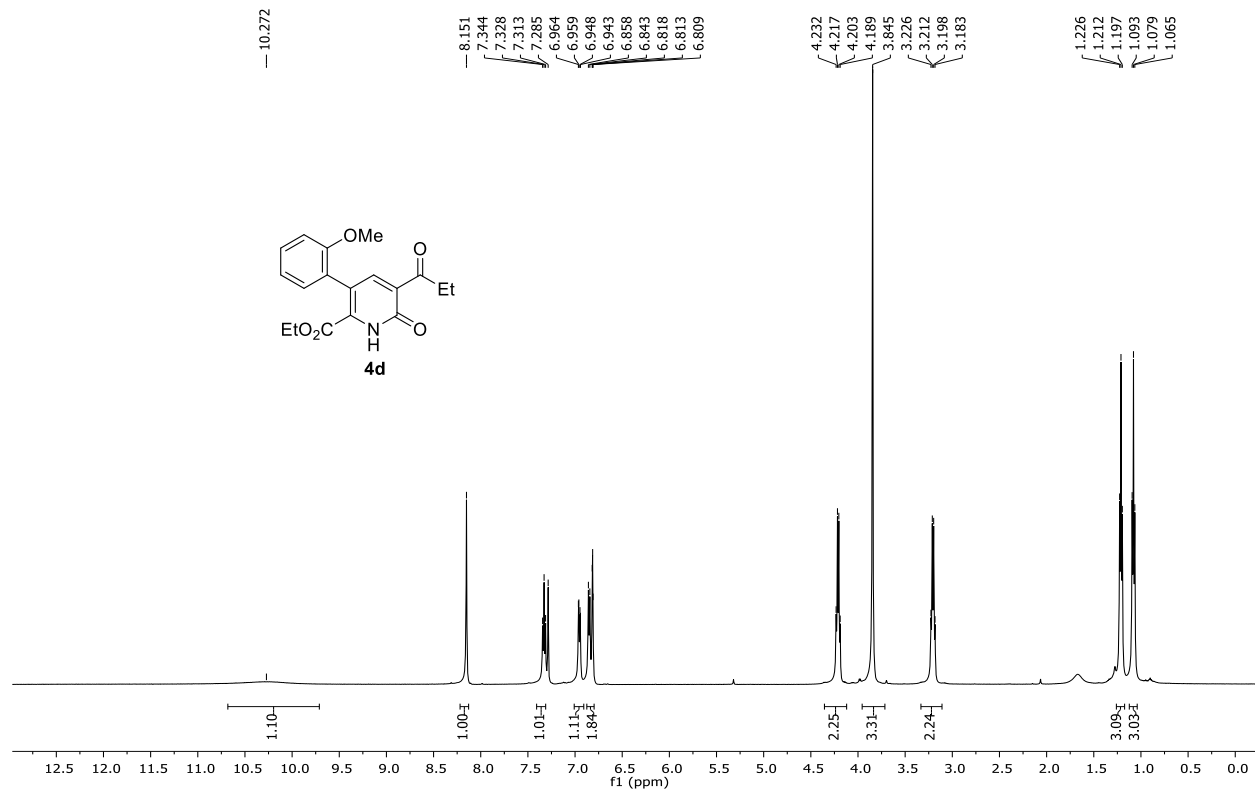

**$^{13}\text{C}$ -NMR (126 MHz,  $\text{CDCl}_3$ ) of compound 4d**

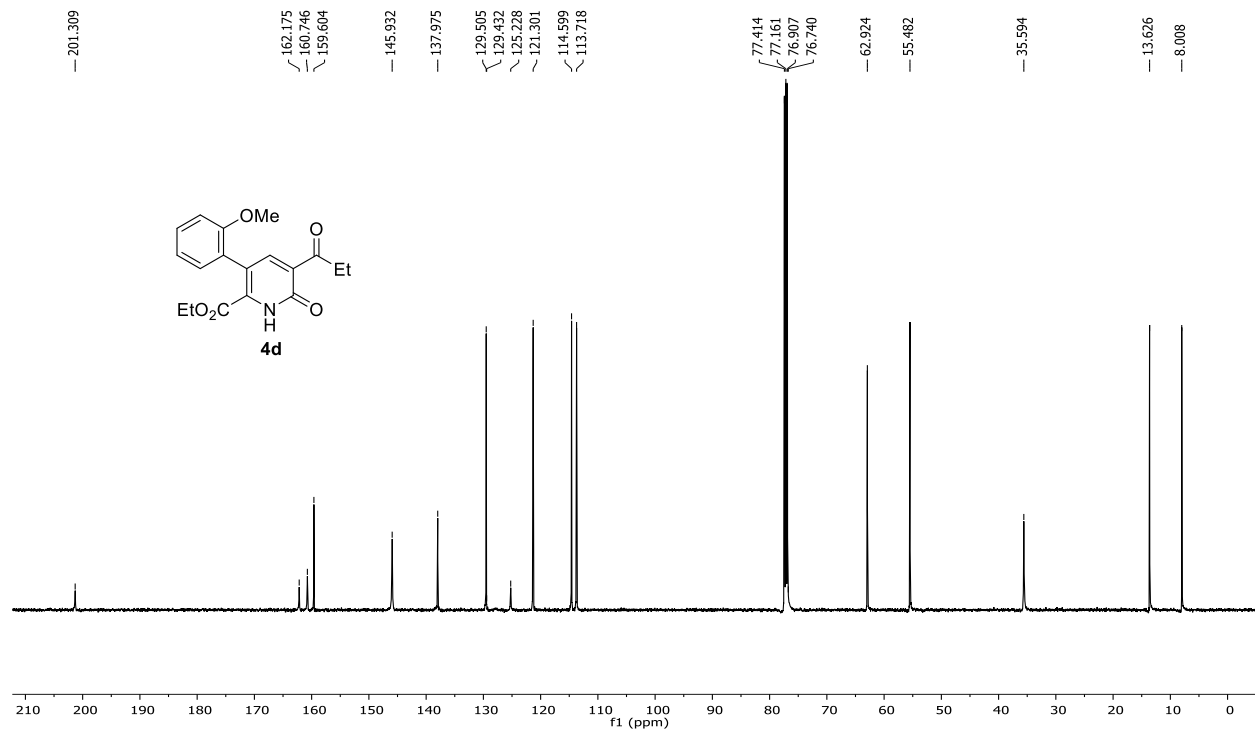

**$^1\text{H}$ -NMR (500 MHz,  $\text{CDCl}_3$ ) of compound **4e****

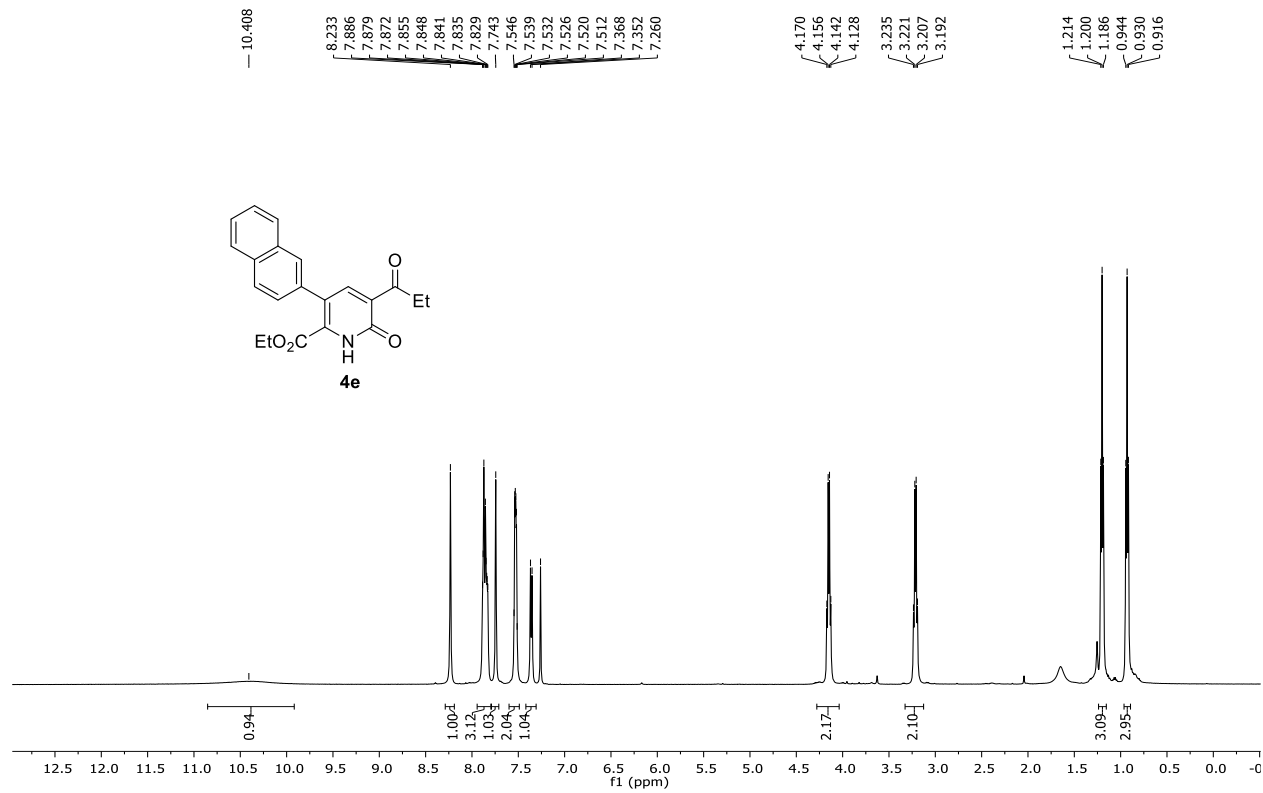

**$^{13}\text{C}$ -NMR (126 MHz,  $\text{CDCl}_3$ ) of compound **4e****

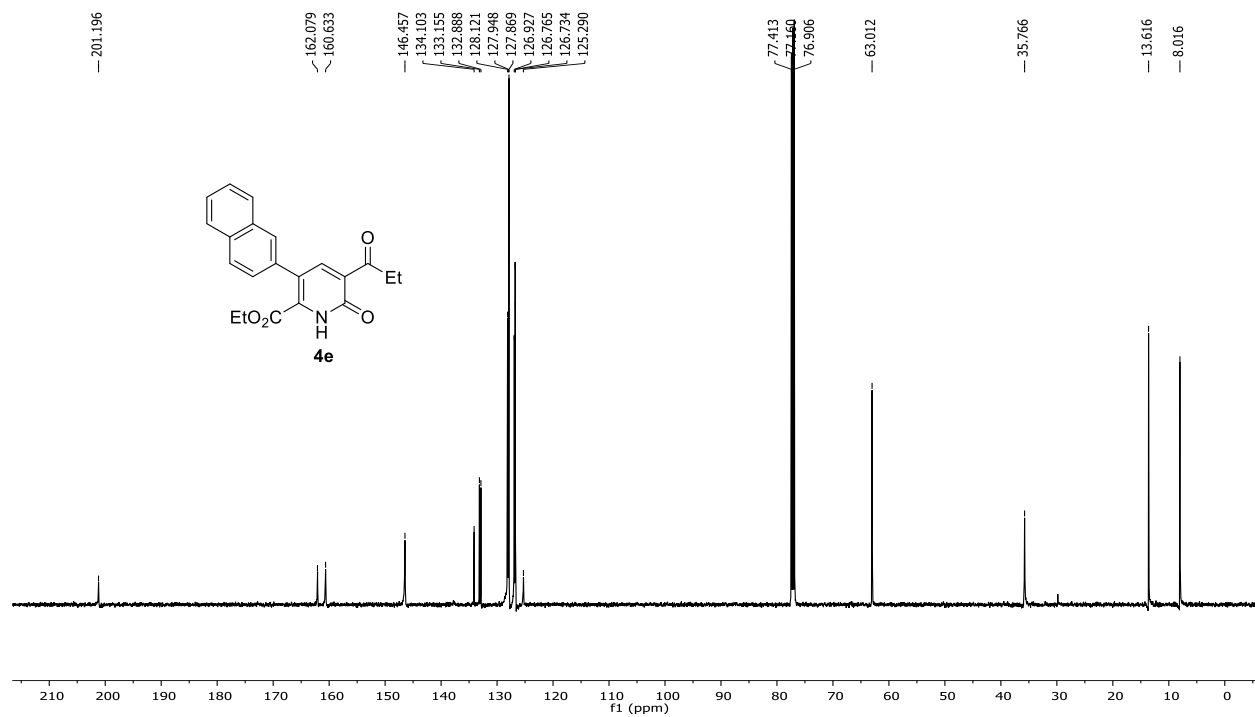

**$^1\text{H}$ -NMR (500 MHz,  $\text{CDCl}_3$ ) of compound **4f****

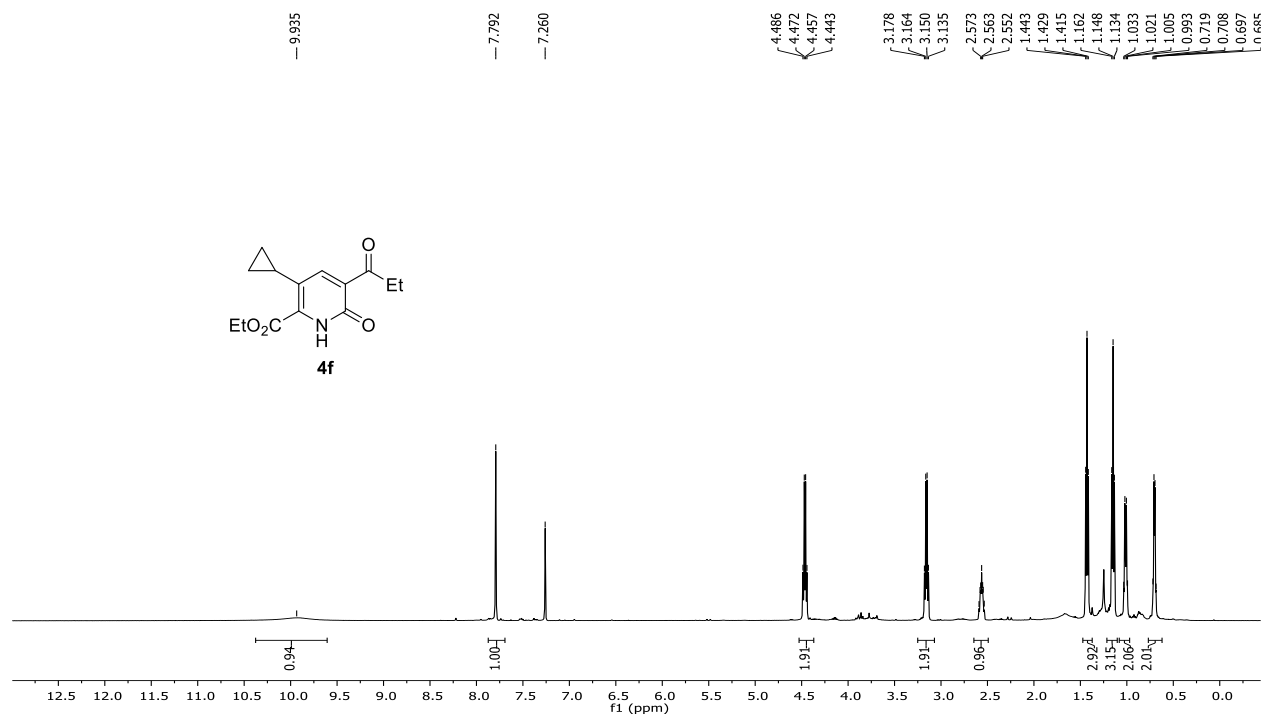

**$^{13}\text{C}$ -NMR (126 MHz,  $\text{CDCl}_3$ ) of compound **4f****

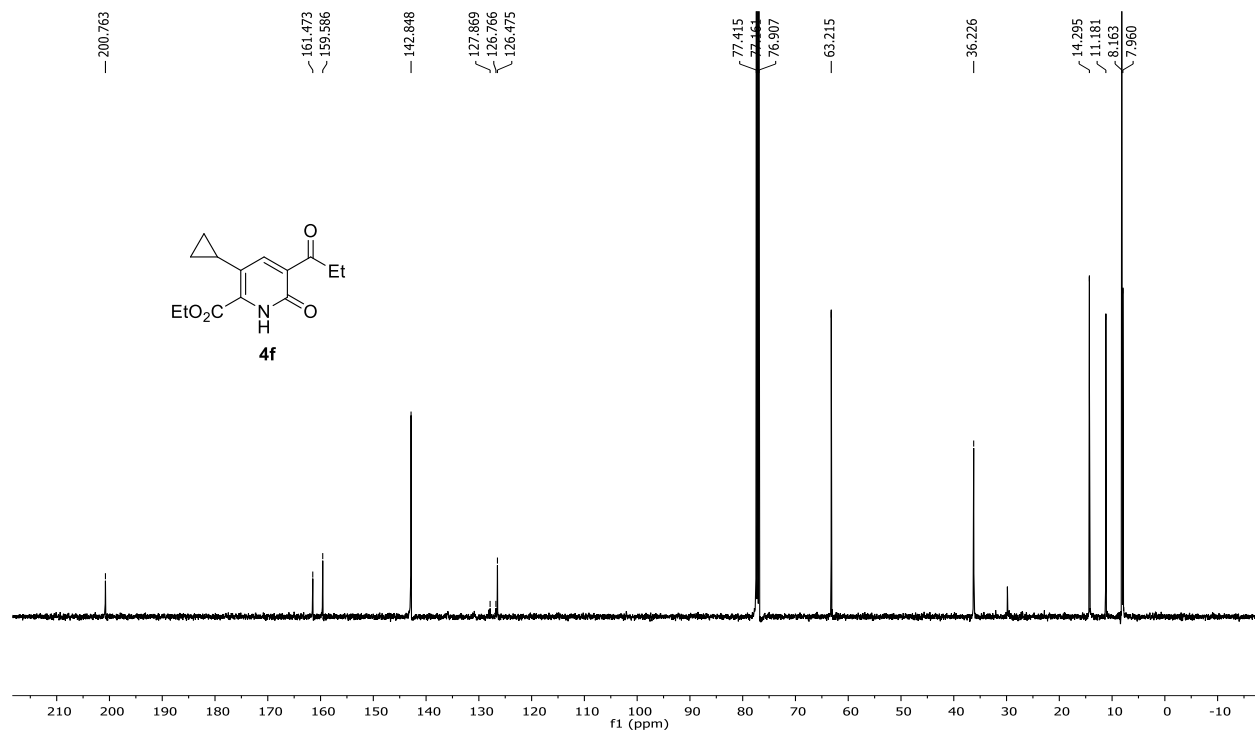

**$^1\text{H}$ -NMR (500 MHz,  $\text{CDCl}_3$ ) of compound **4g****

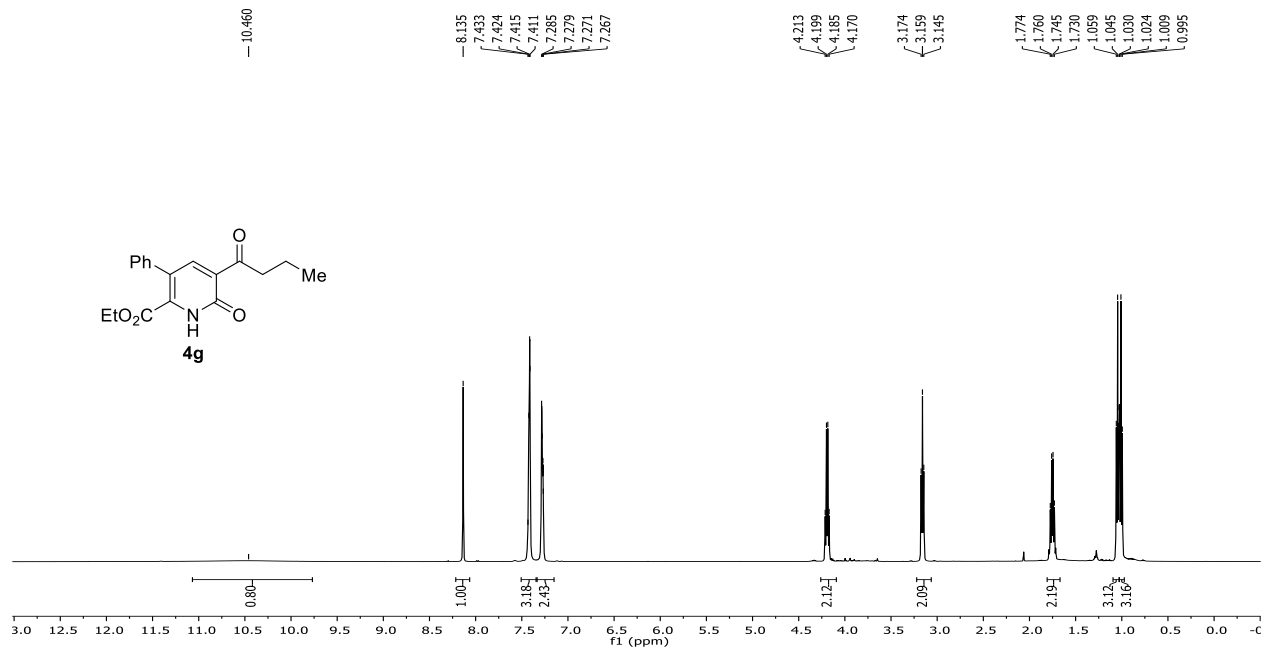

**$^{13}\text{C}$ -NMR (126 MHz,  $\text{CDCl}_3$ ) of compound **4g****

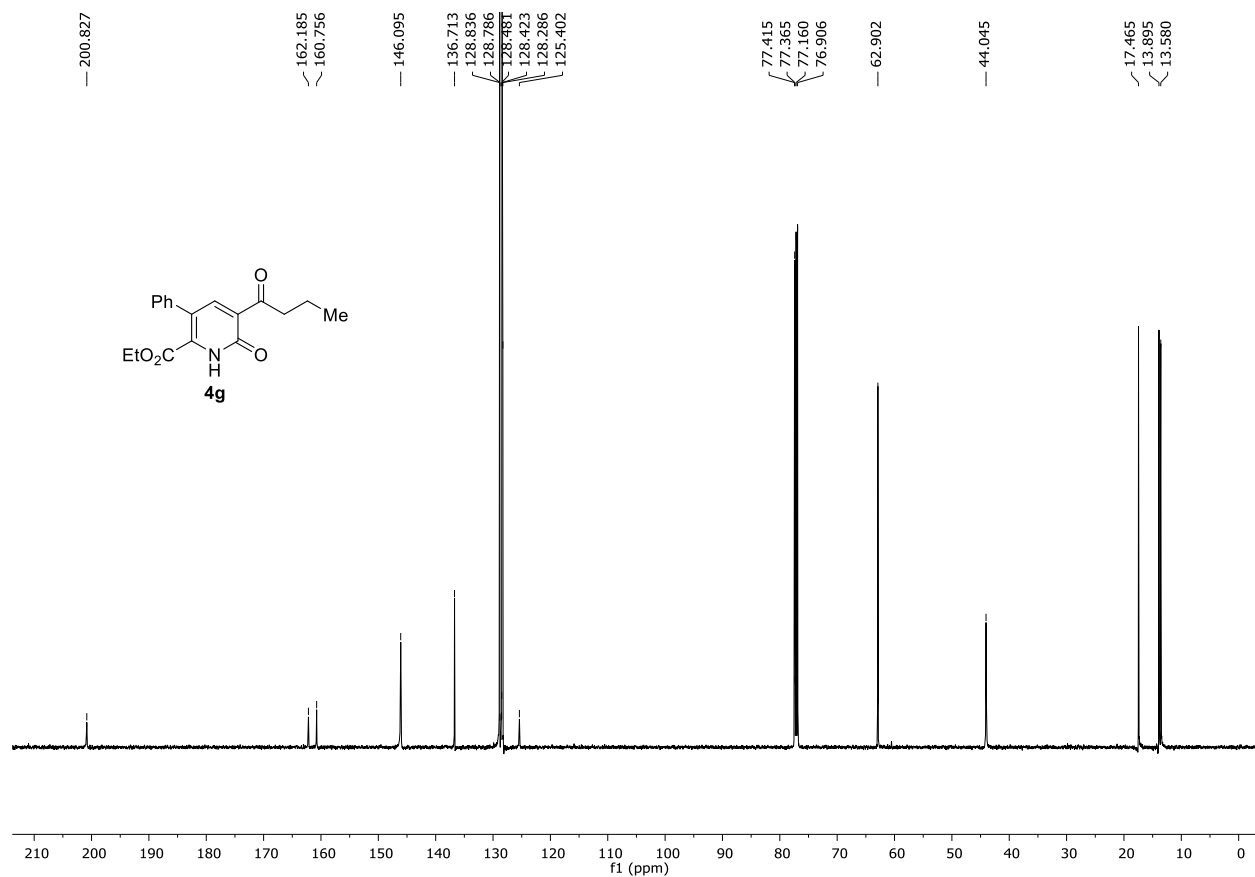

**$^1\text{H}$ -NMR (500 MHz,  $\text{CDCl}_3$ ) of compound 4h**

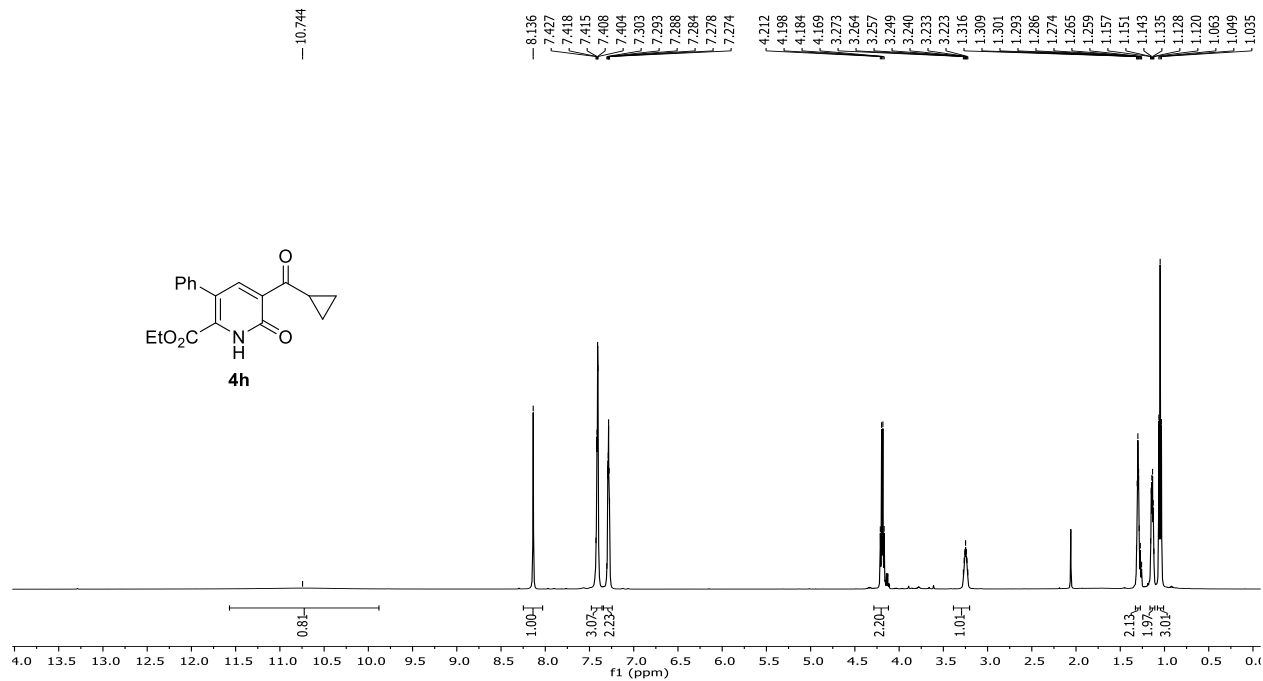

**$^{13}\text{C}$ -NMR (126 MHz,  $\text{CDCl}_3$ ) of compound 4h**

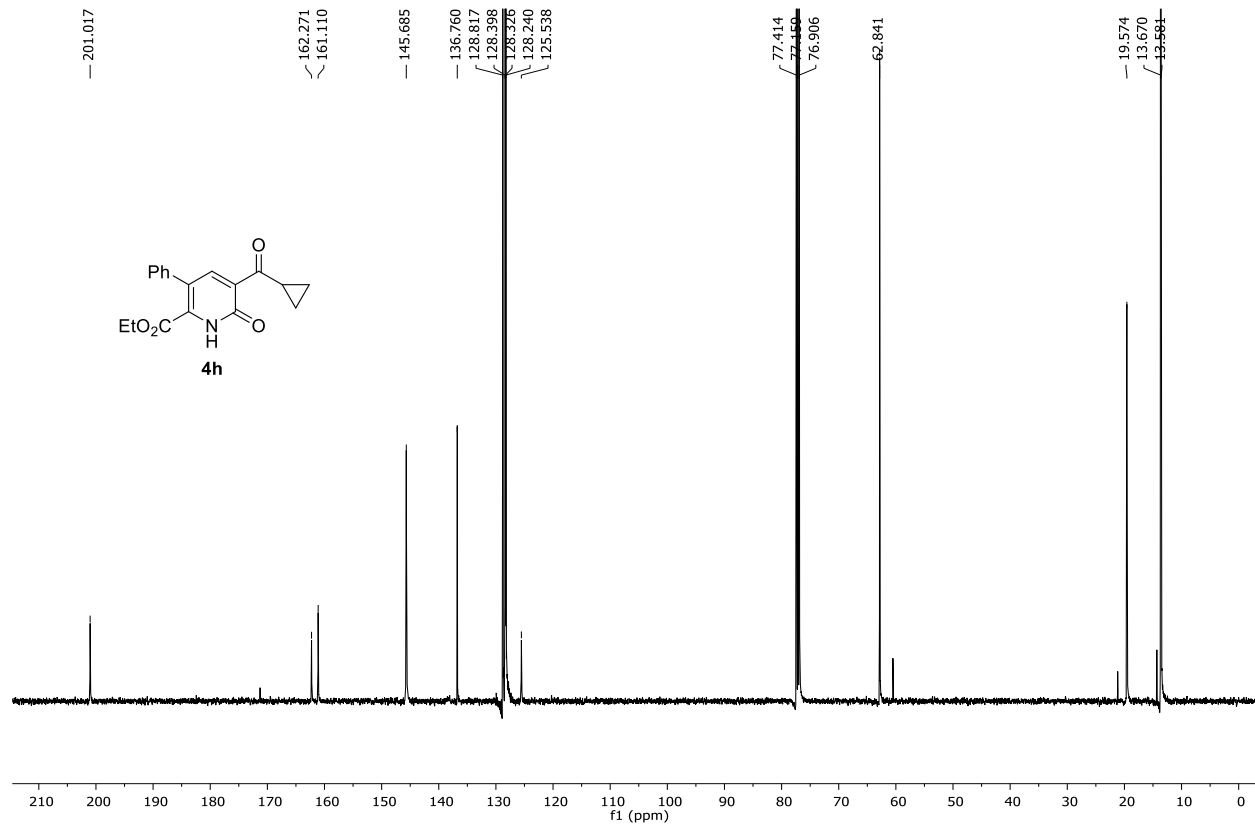



**$^1\text{H}$ -NMR (500 MHz,  $\text{CDCl}_3$ ) of compound **4i****

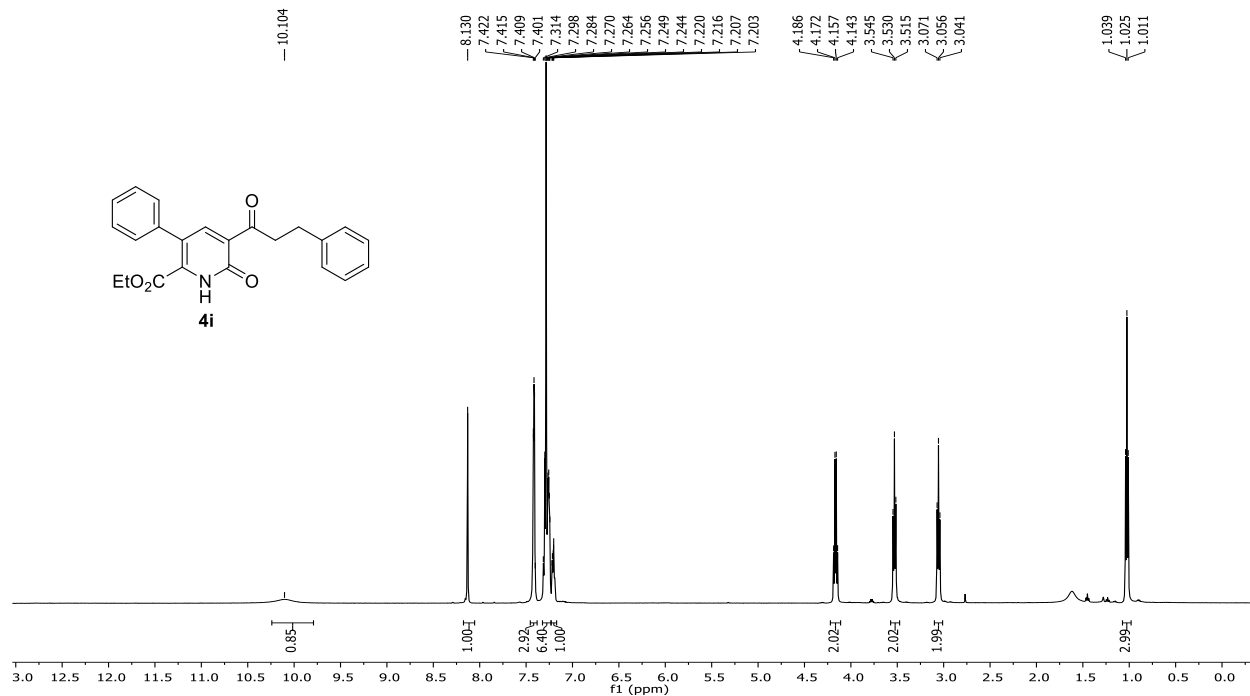

**$^{13}\text{C}$ -NMR (126 MHz,  $\text{CDCl}_3$ ) of compound **4i****

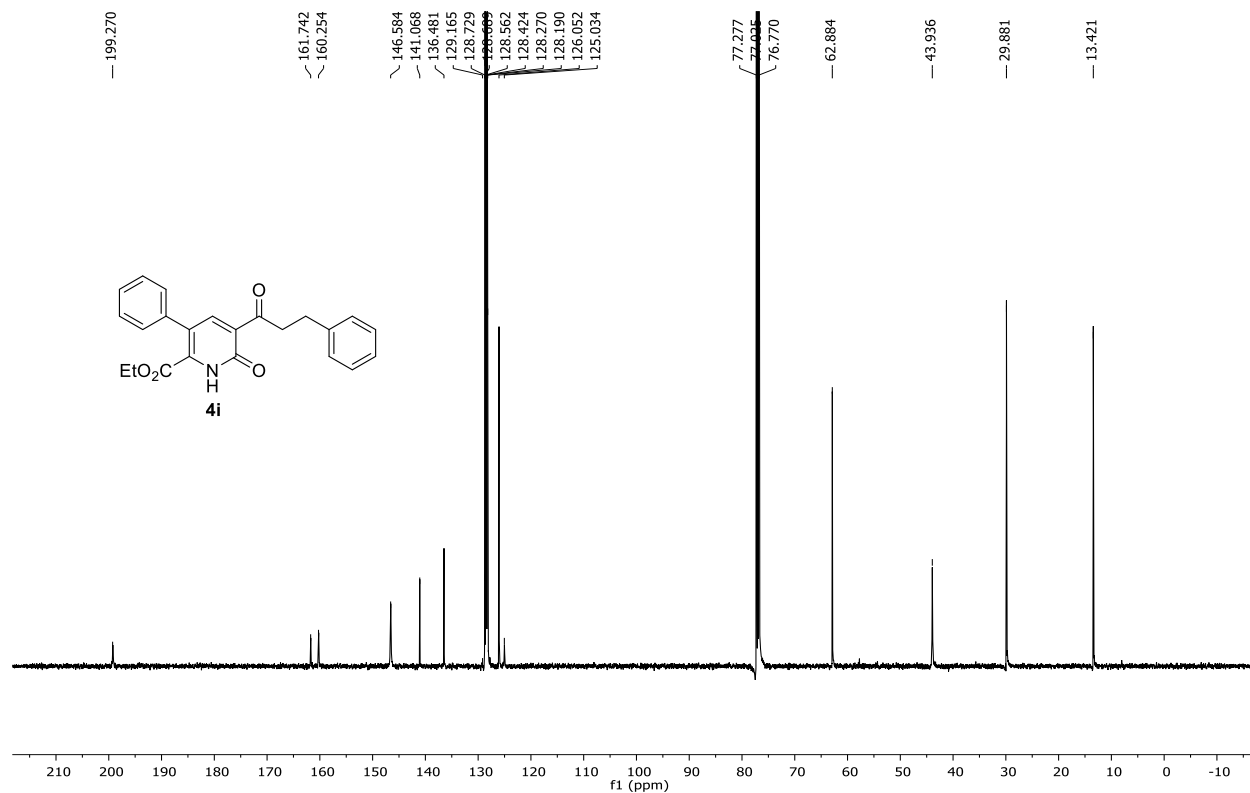

**$^1\text{H}$ -NMR (500 MHz,  $\text{CDCl}_3$ ) of compound **4j****

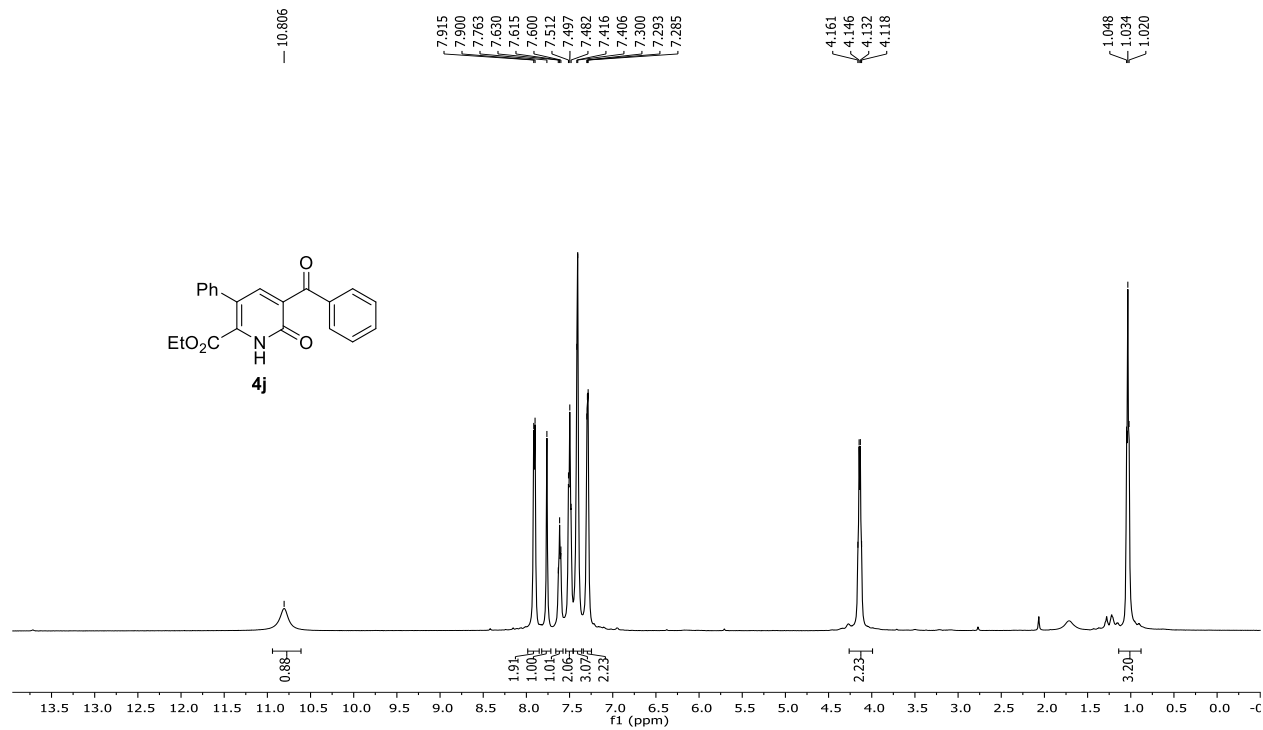

**$^{13}\text{C}$ -NMR (126 MHz,  $\text{CDCl}_3$ ) of compound **4j****

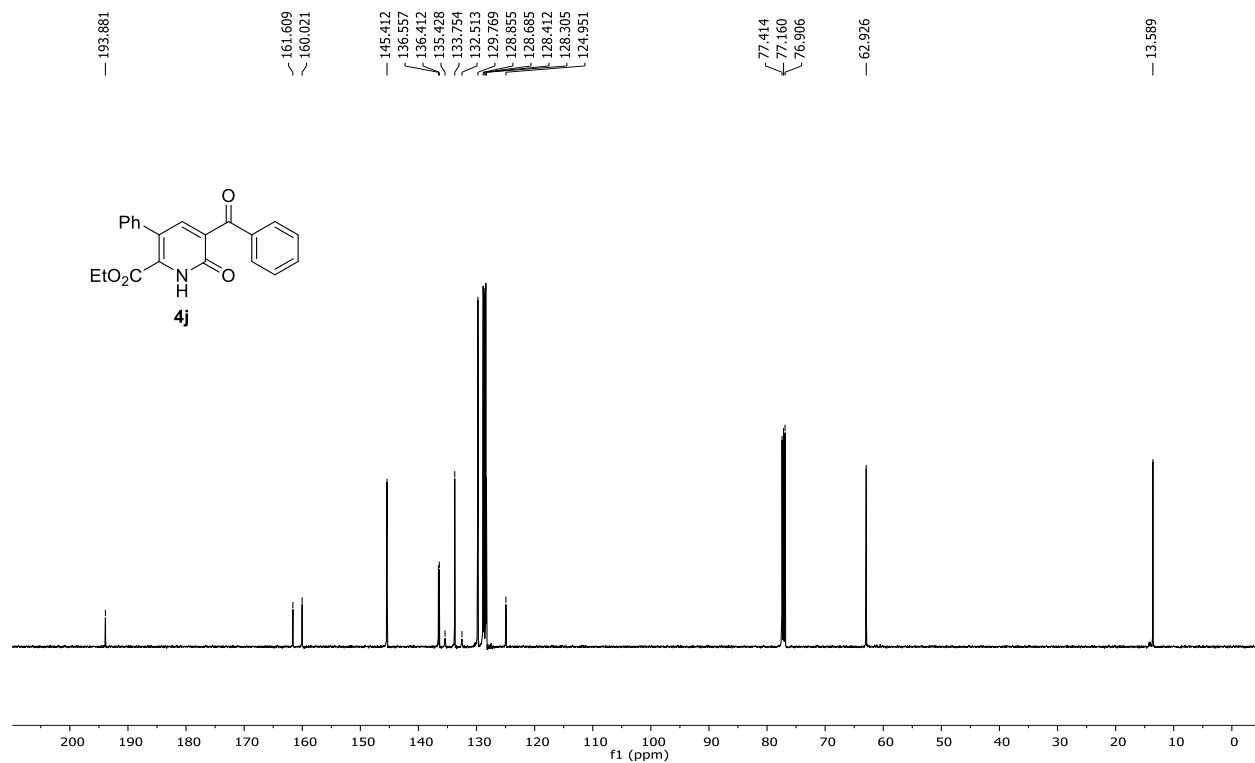

**$^1\text{H}$ -NMR (500 MHz,  $\text{CDCl}_3$ ) of compound 4k**

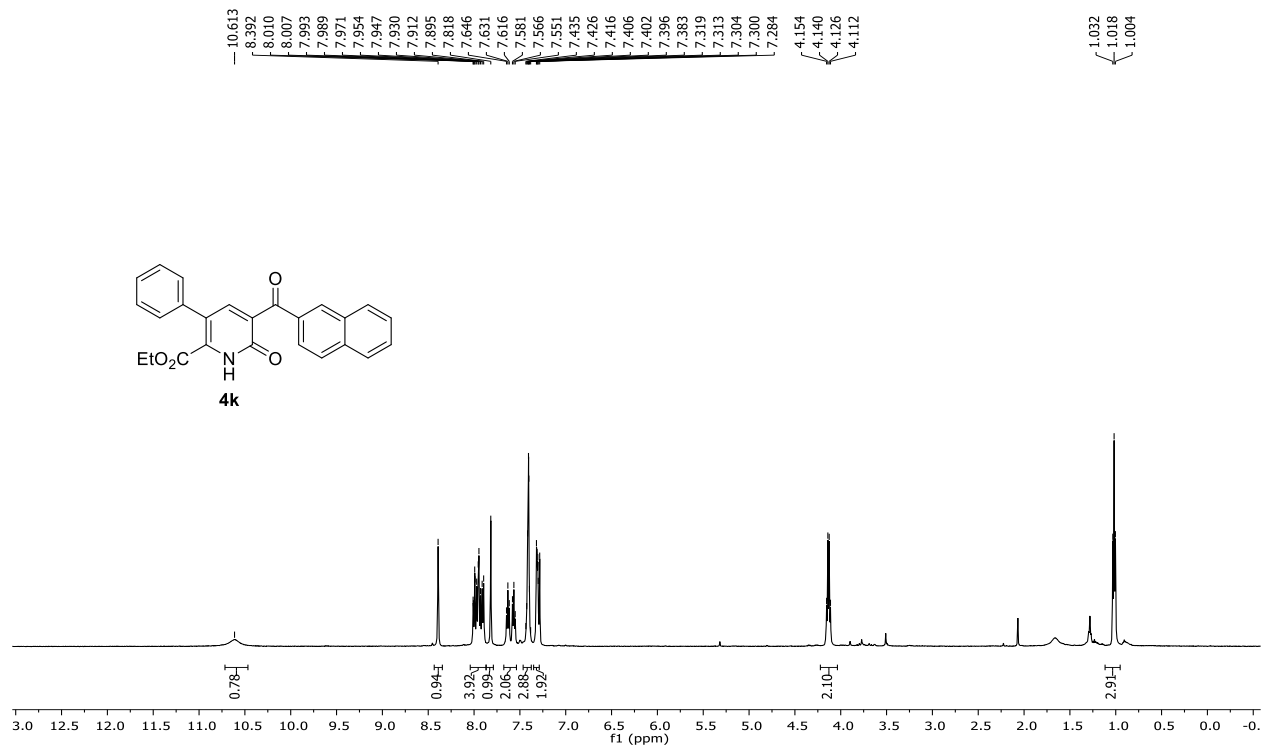

**$^{13}\text{C}$ -NMR (126 MHz,  $\text{CDCl}_3$ ) of compound 4k**

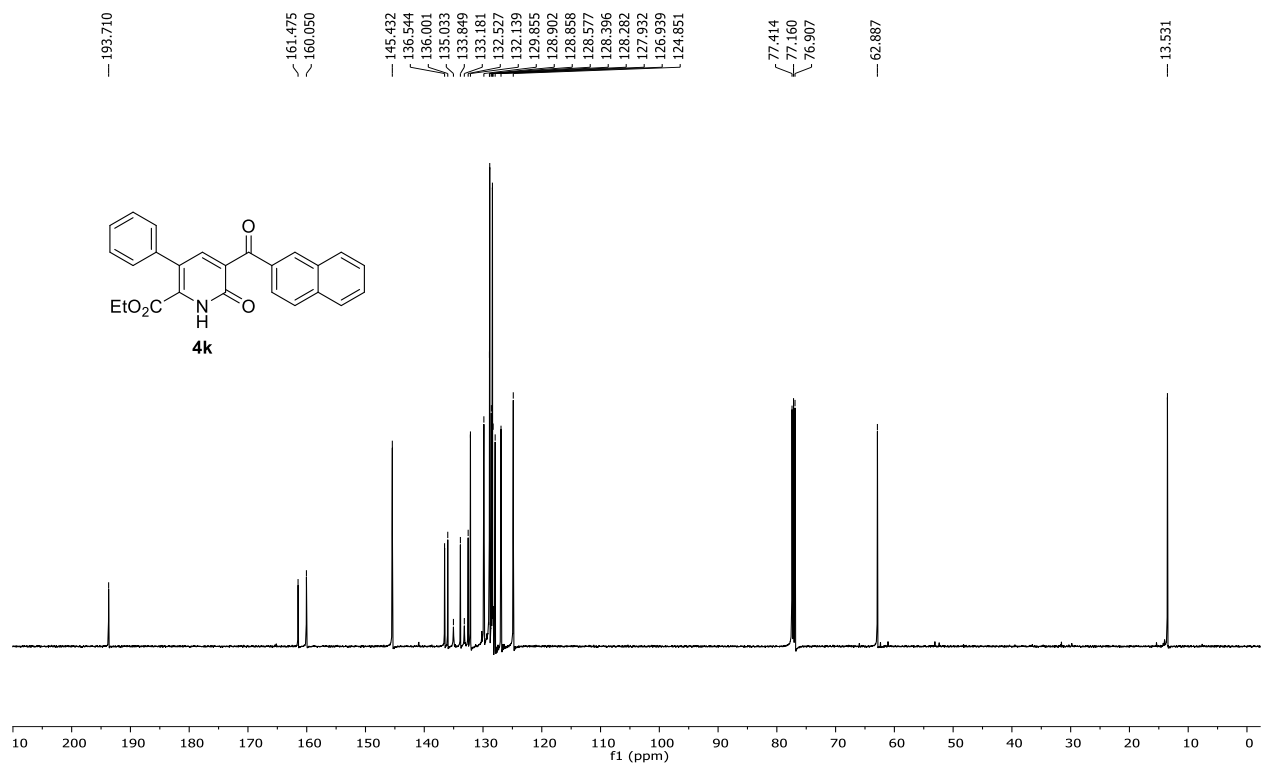

**<sup>1</sup>H-NMR (500 MHz, CDCl<sub>3</sub>) of compound 4I**

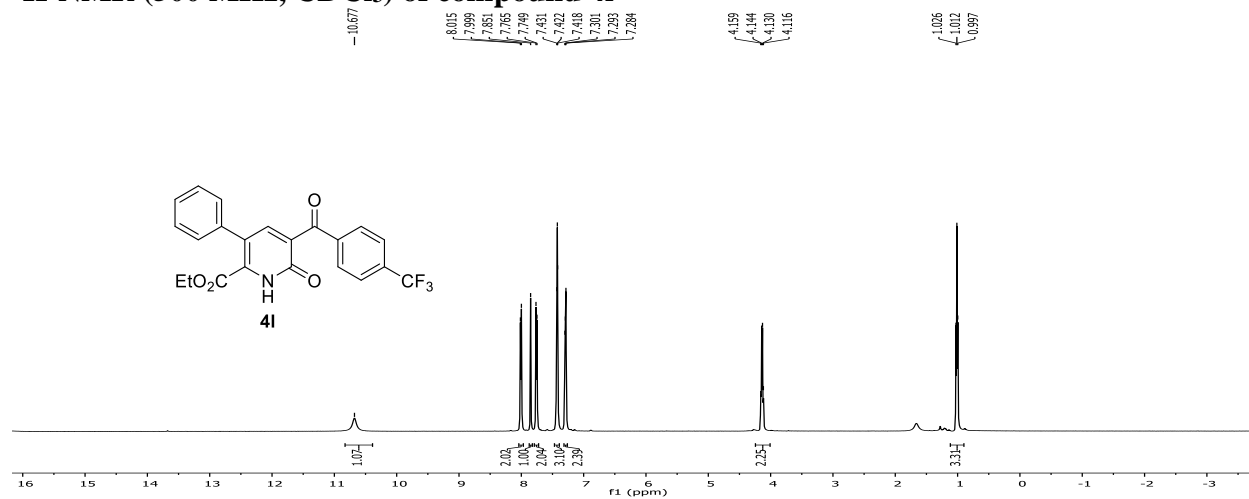

**<sup>13</sup>C-NMR (126 MHz, CDCl<sub>3</sub>) of compound 4I**

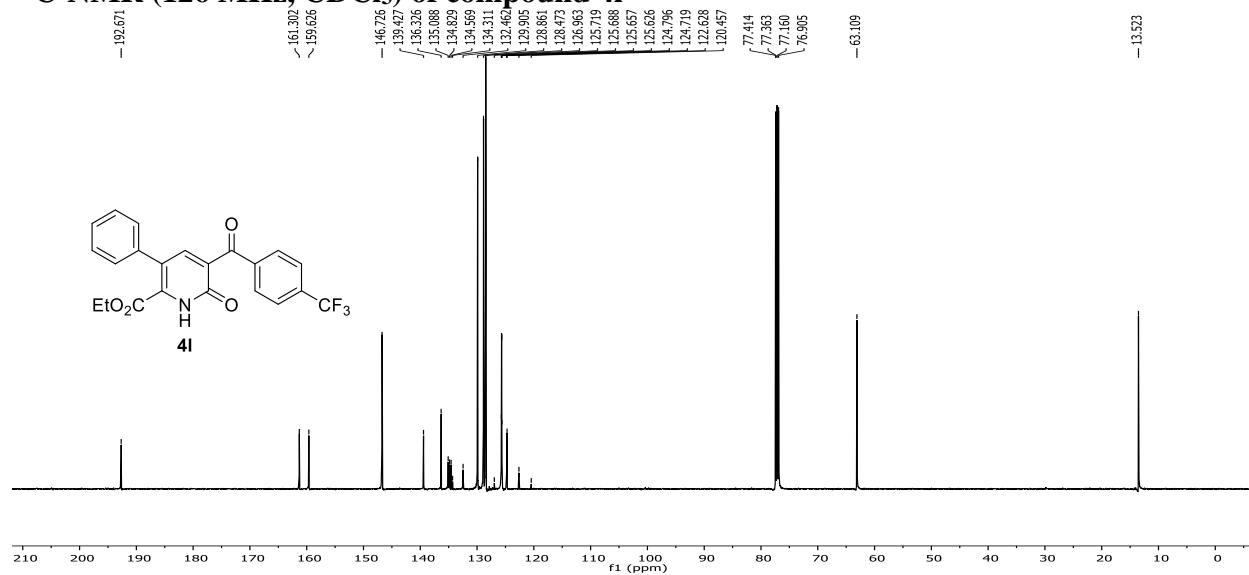

**<sup>19</sup>F-NMR (471 MHz, CDCl<sub>3</sub>) of compound 4I**

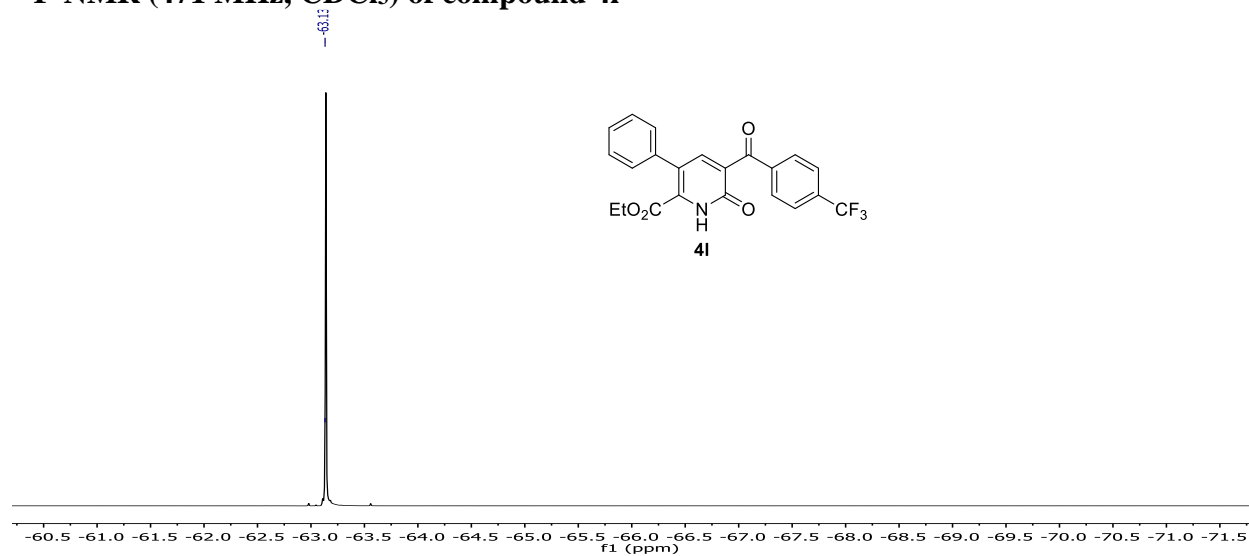

**$^1\text{H}$ -NMR (500 MHz,  $\text{CDCl}_3$ ) of compound 4m**

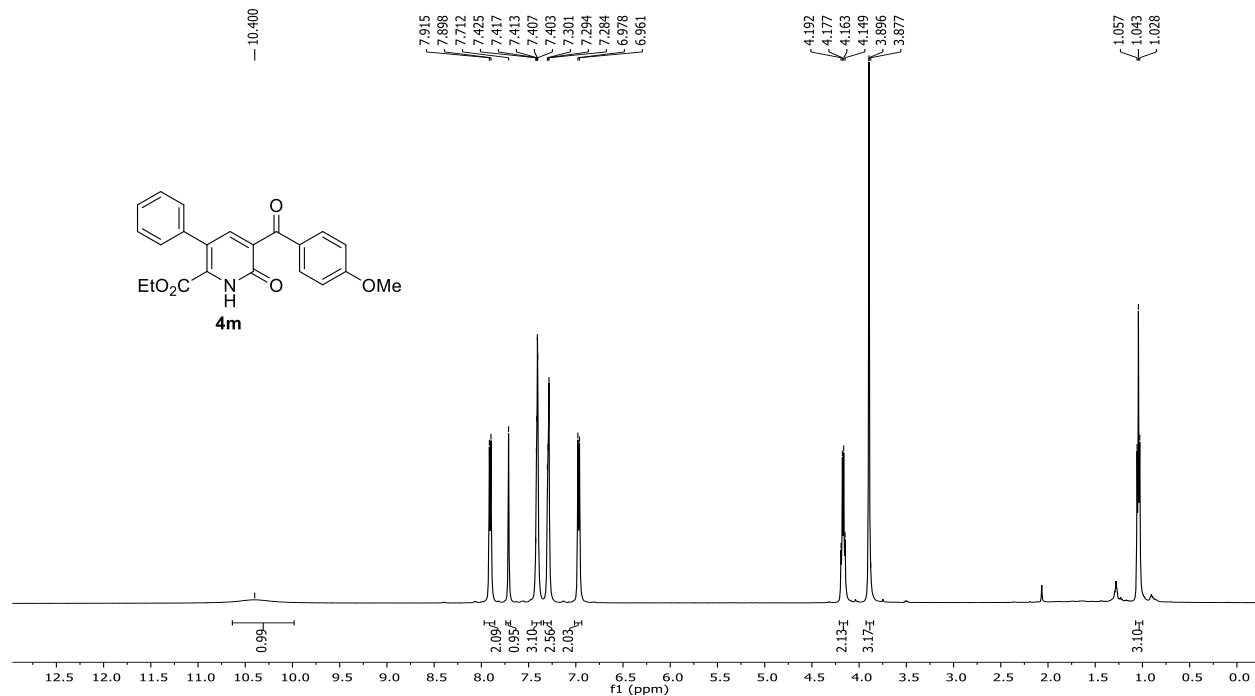

**$^{13}\text{C}$ -NMR (126 MHz,  $\text{CDCl}_3$ ) of compound 4m**

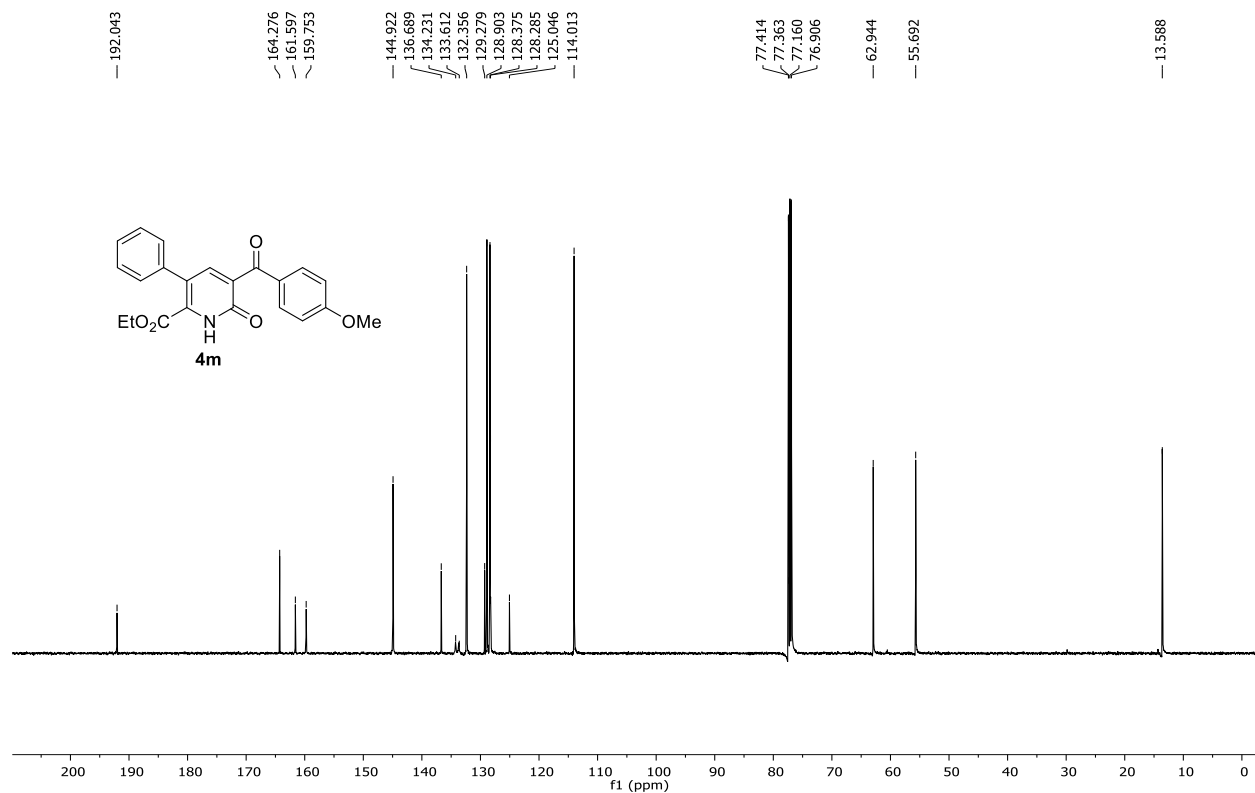

**$^1\text{H}$ -NMR (500 MHz,  $\text{CDCl}_3$ ) of compound 4n**

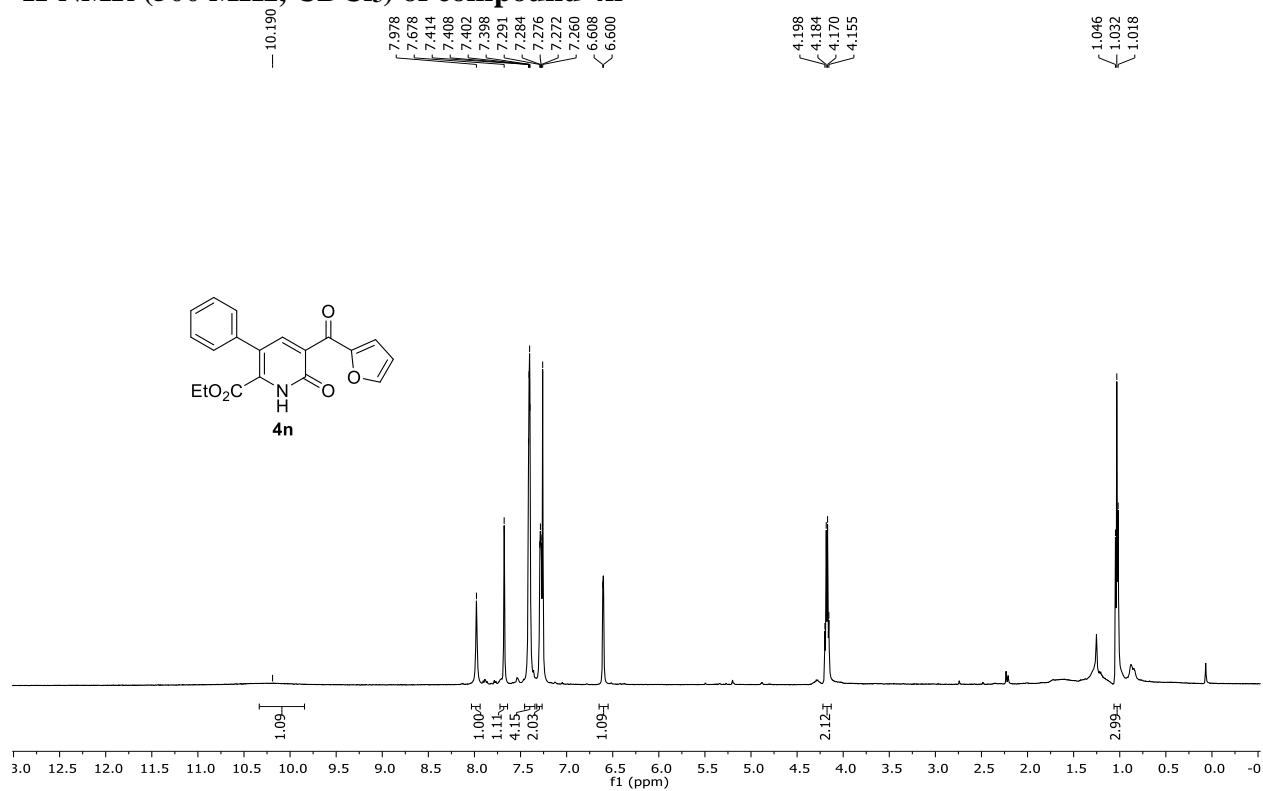

**$^{13}\text{C}$ -NMR (126 MHz,  $\text{CDCl}_3$ ) of compound 4n**

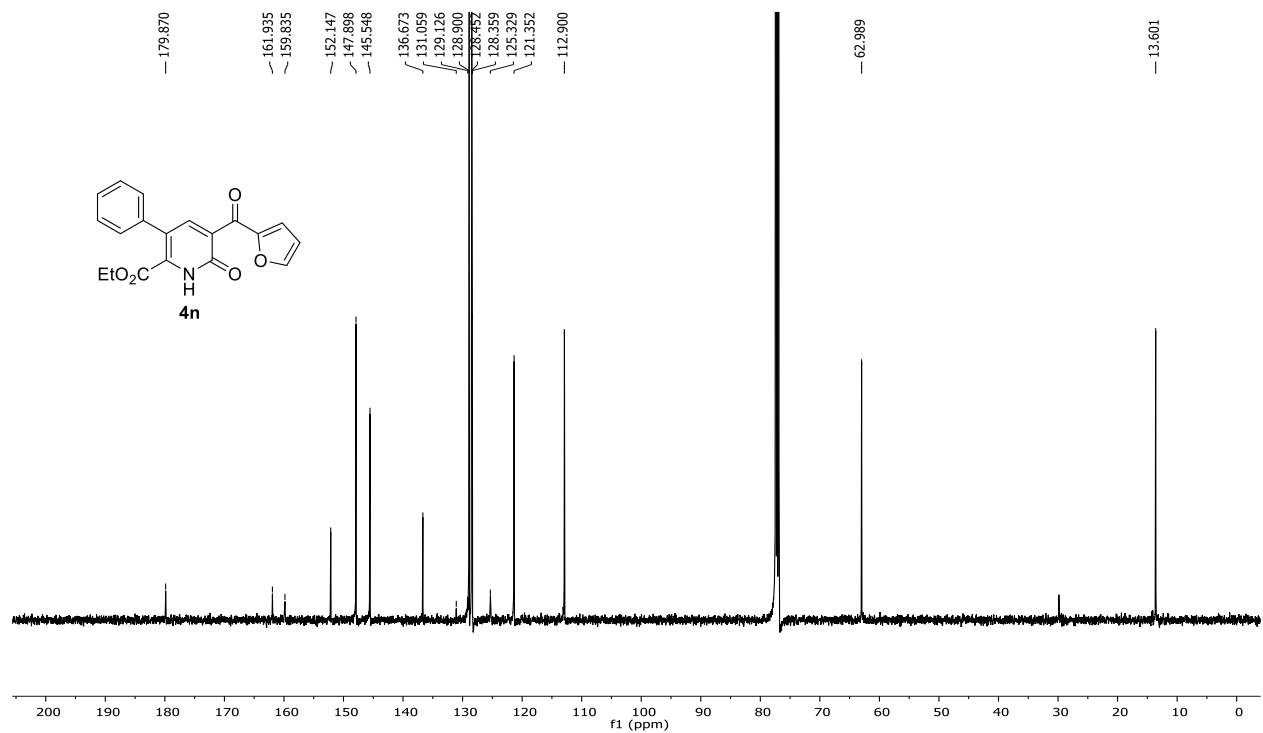

**$^1\text{H}$ -NMR (500 MHz,  $\text{CDCl}_3$ ) of compound 4o**

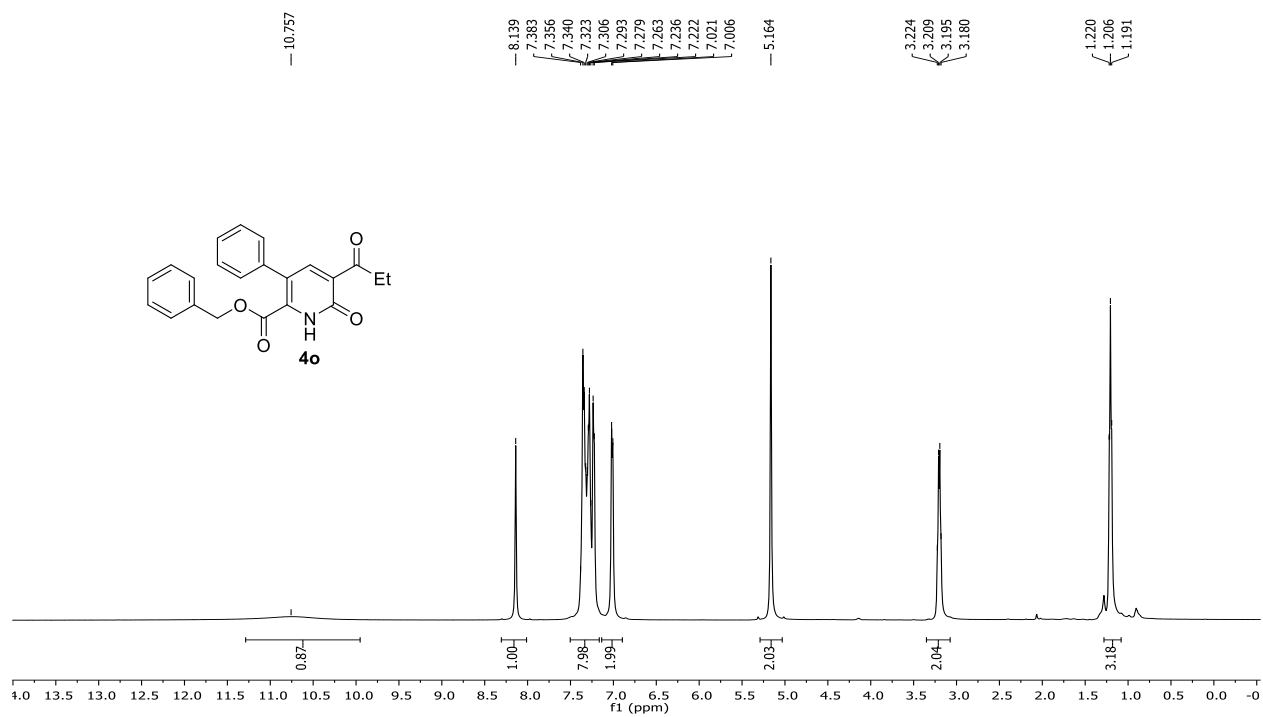

**$^{13}\text{C}$ -NMR (126 MHz,  $\text{CDCl}_3$ ) of compound 4o**

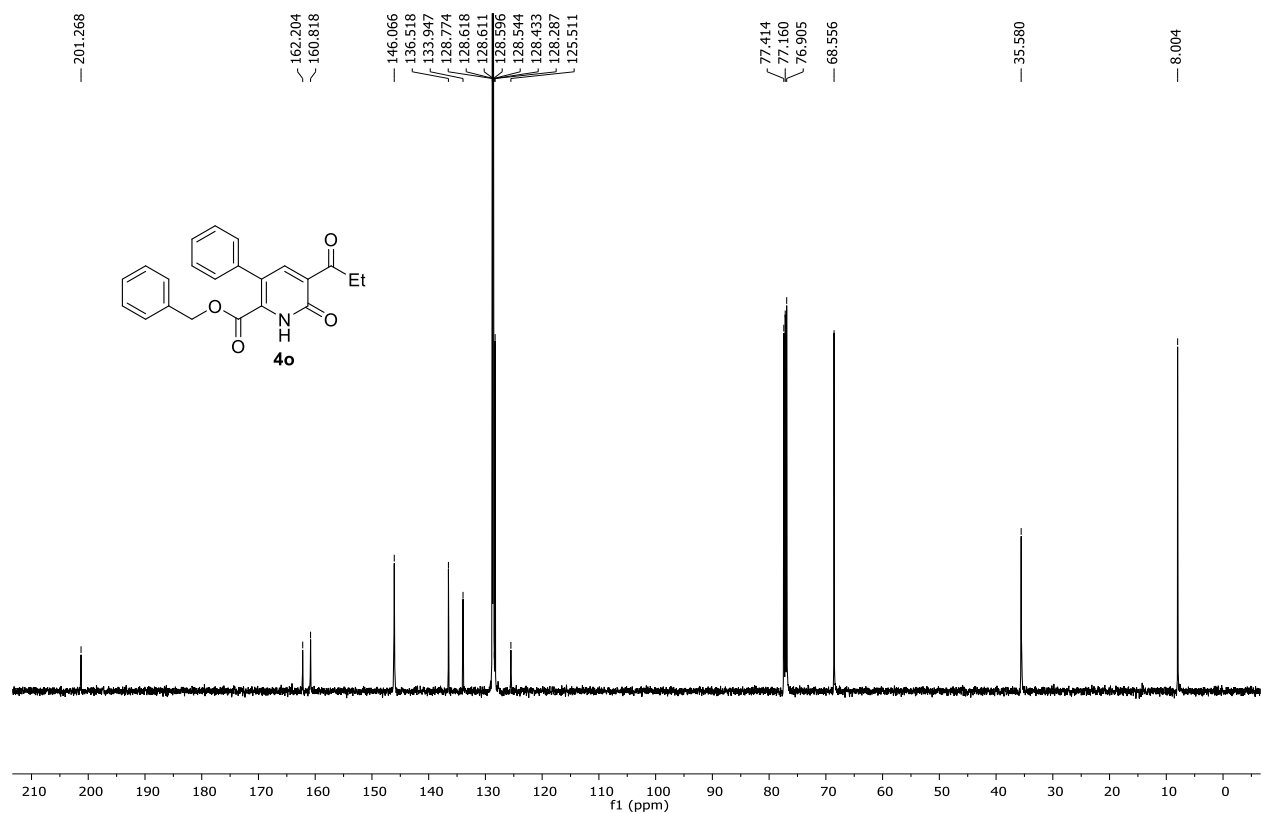

**$^1\text{H}$ -NMR (500 MHz,  $\text{CDCl}_3$ ) of compound 4p**

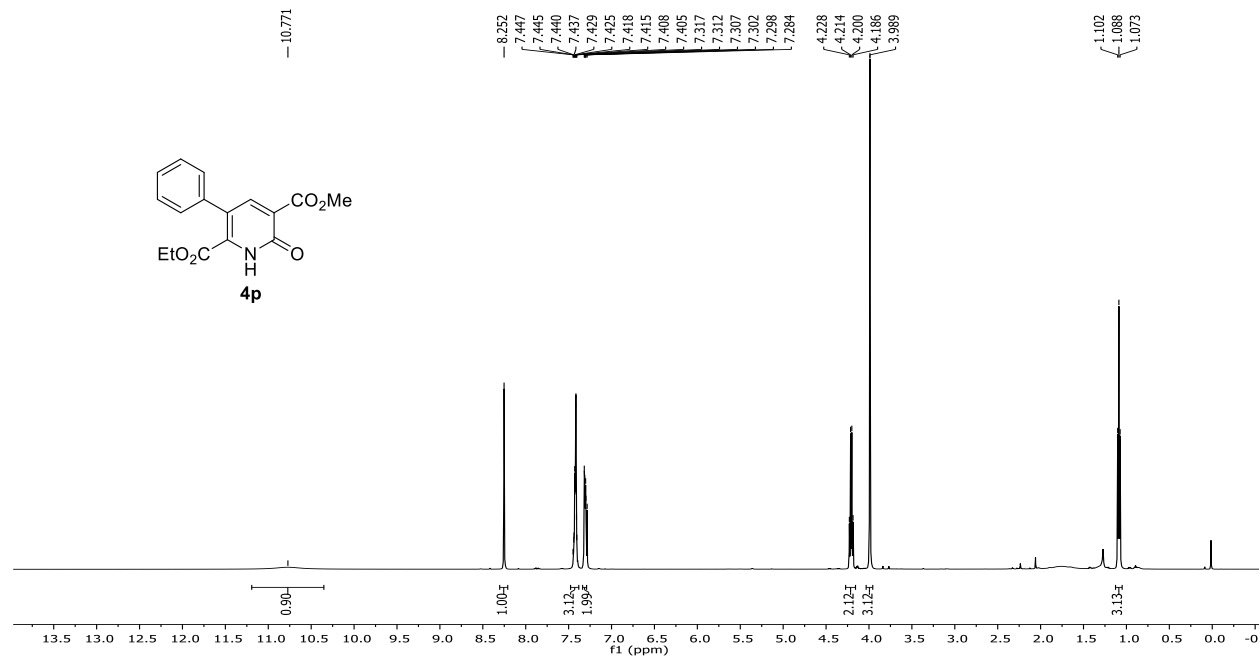

**$^{13}\text{C}$ -NMR (126 MHz,  $\text{CDCl}_3$ ) of compound 4p**

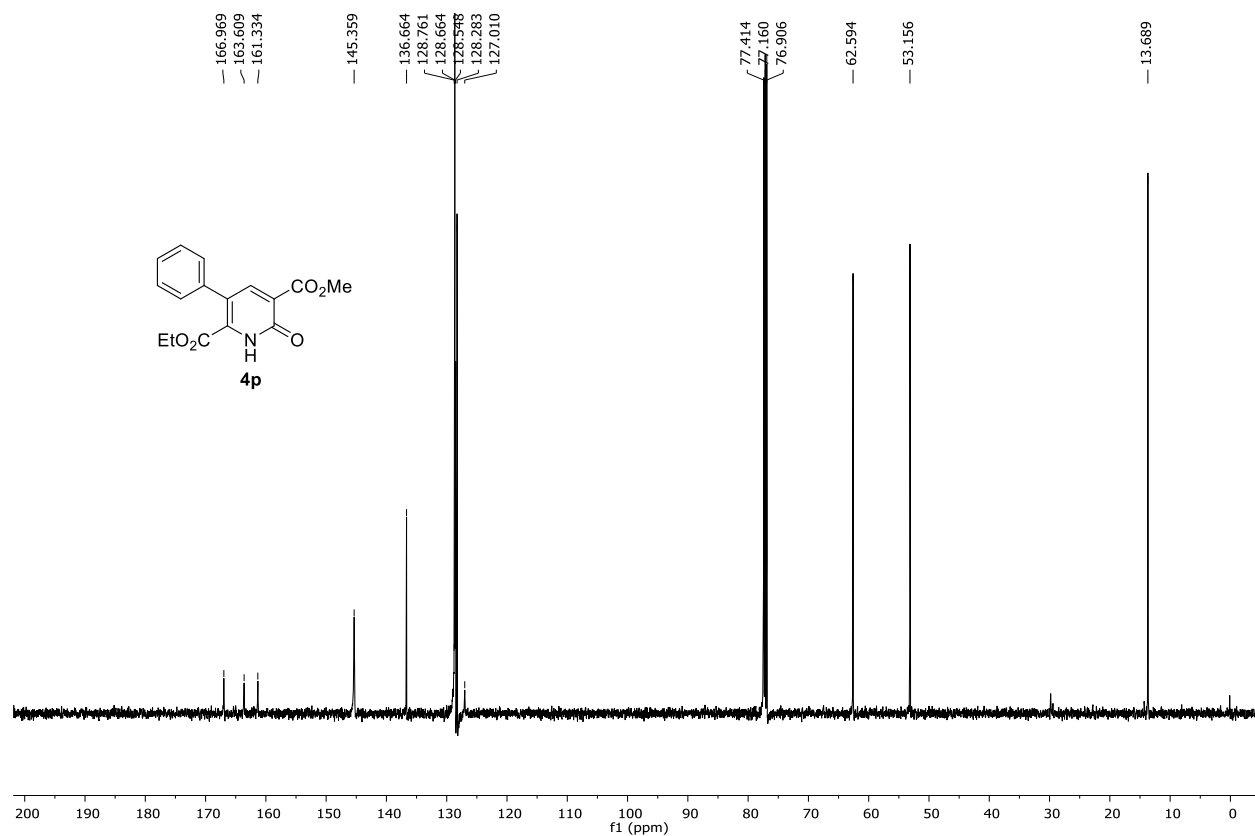



**$^1\text{H}$ -NMR (500 MHz,  $\text{CDCl}_3$ ) of compound 4q**

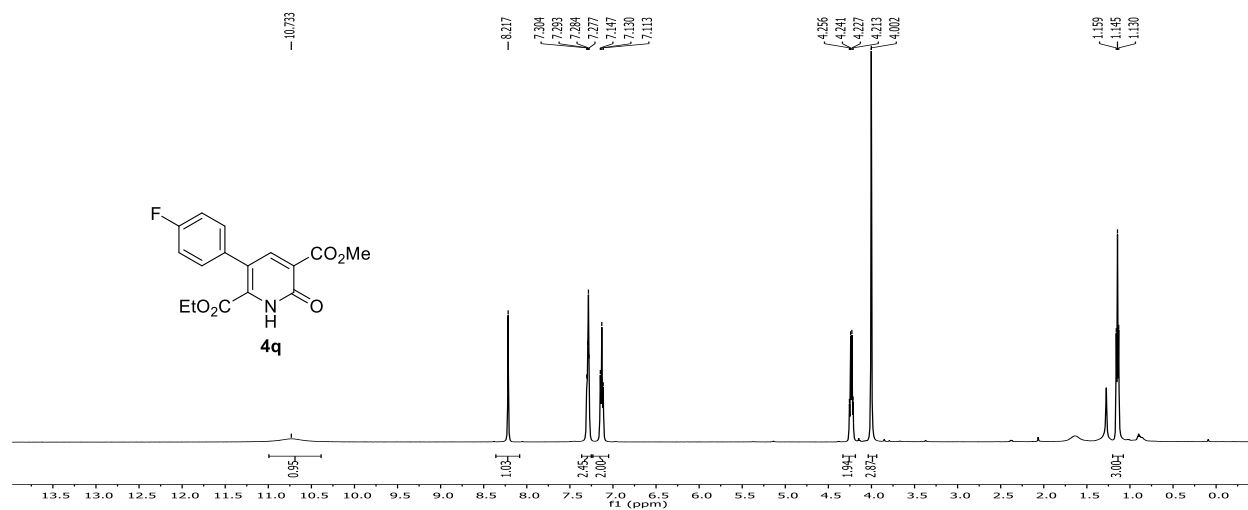

**$^{13}\text{C}$ -NMR (126 MHz,  $\text{CDCl}_3$ ) of compound 4q**

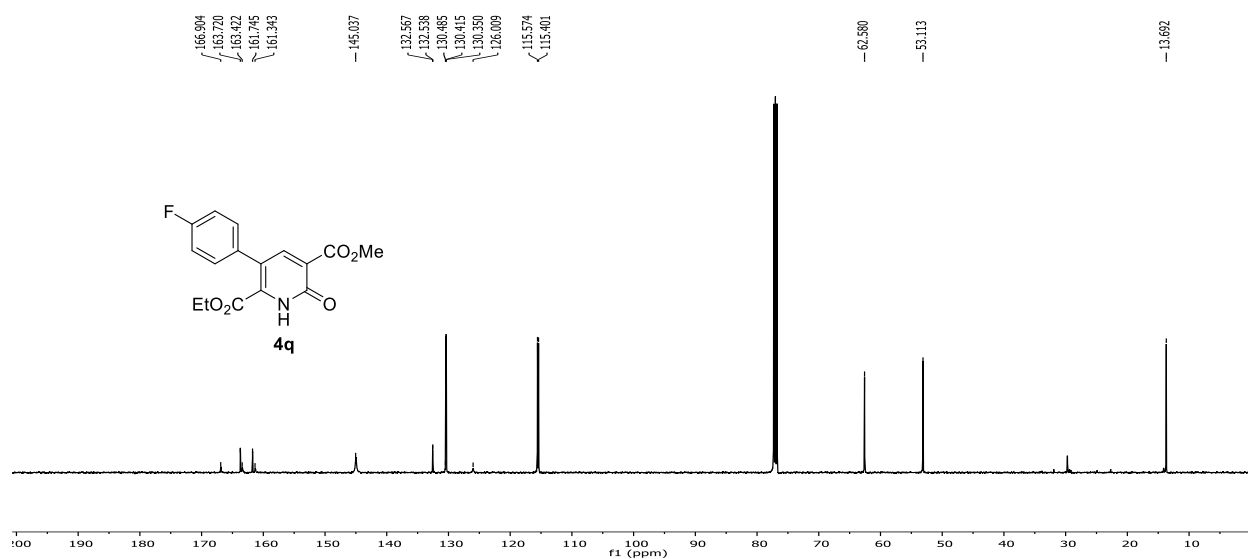

**$^{19}\text{F}$ -NMR (471 MHz,  $\text{CDCl}_3$ ) of compound 4q**

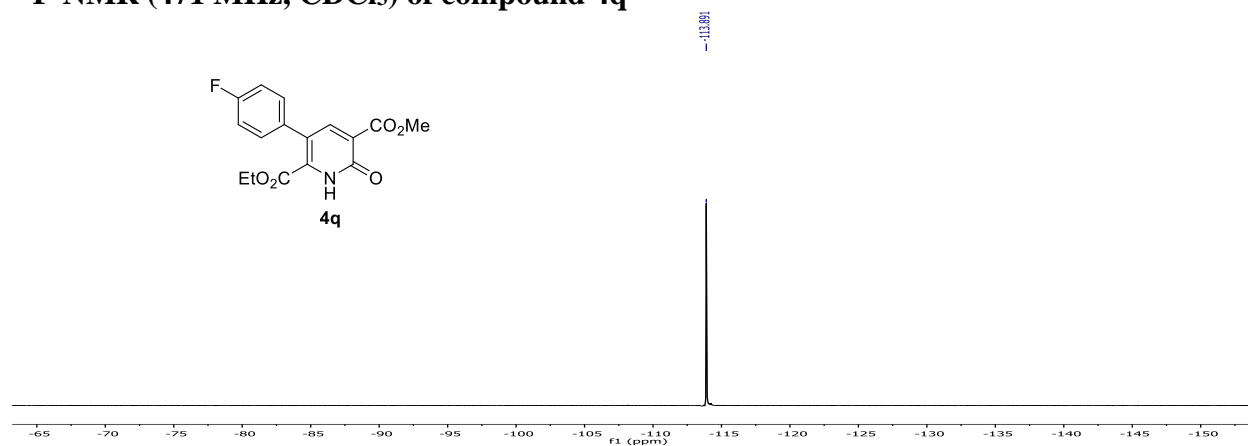

**$^1\text{H}$ -NMR (500 MHz,  $\text{CDCl}_3$ ) of compound 4r**

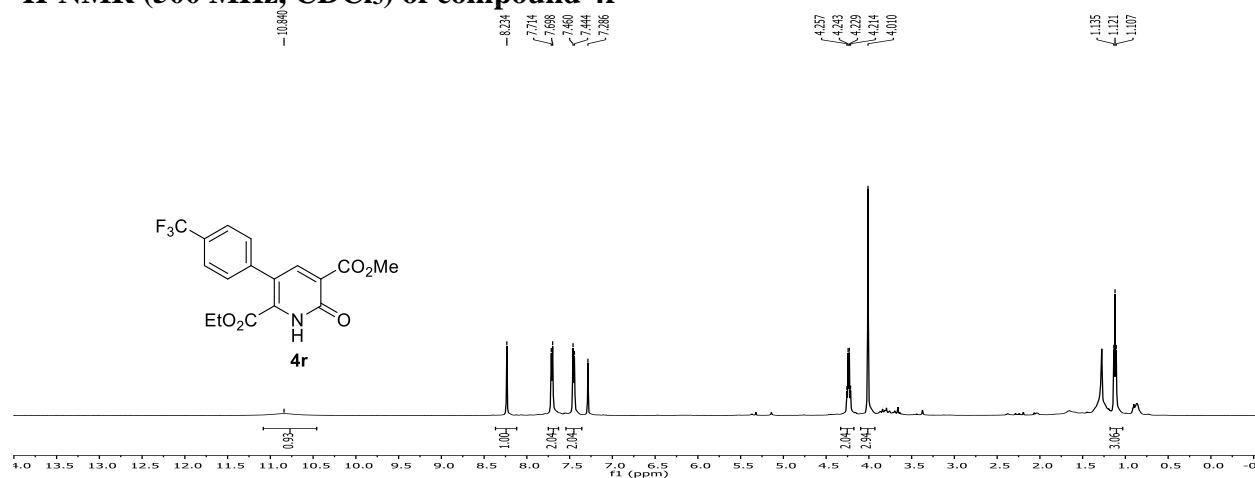

**$^{13}\text{C}$ -NMR (126 MHz,  $\text{CDCl}_3$ ) of compound 4r**

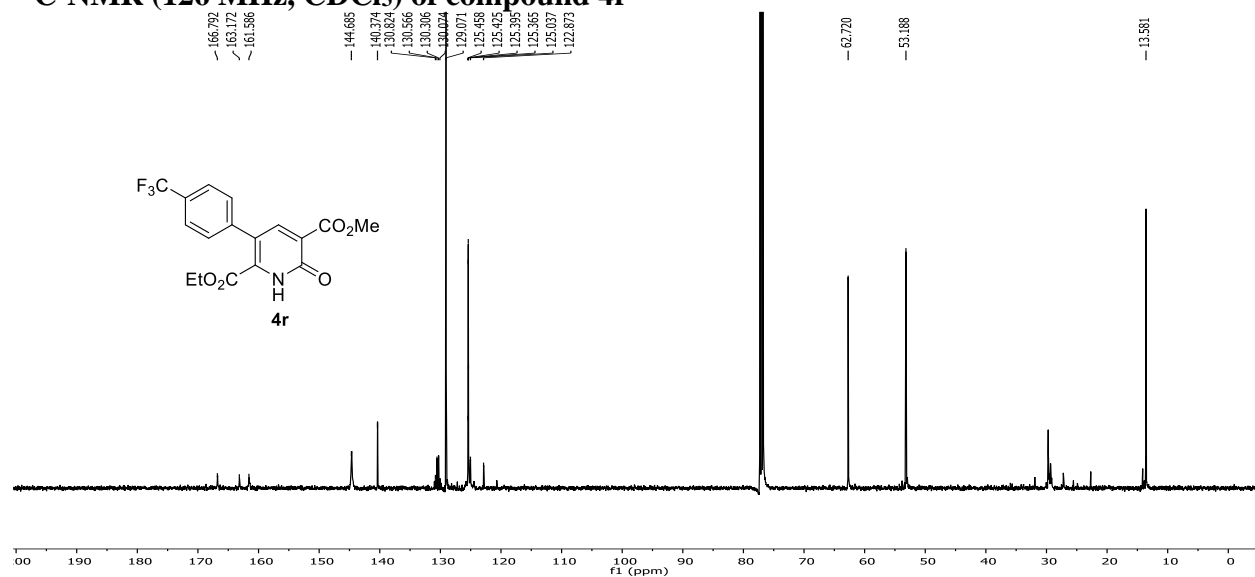

**$^{19}\text{F}$ -NMR (471 MHz,  $\text{CDCl}_3$ ) of compound 4r**

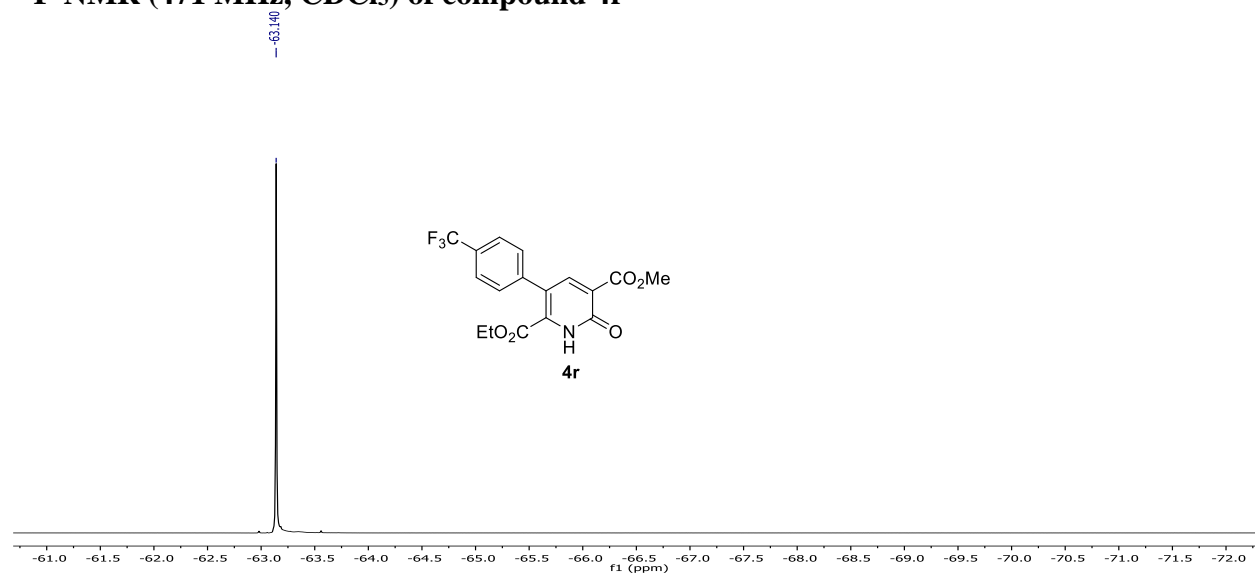

**$^1\text{H}$ -NMR (500 MHz,  $\text{CDCl}_3$ ) of compound **4s****

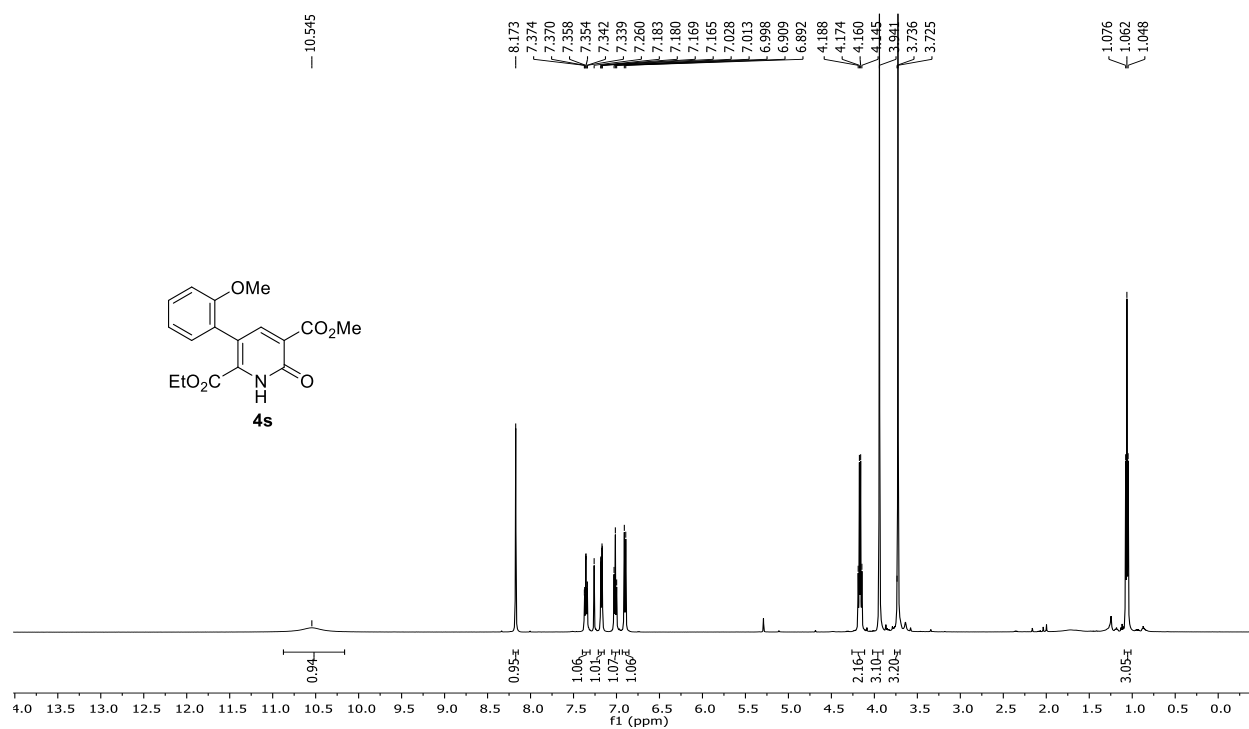

**$^{13}\text{C}$ -NMR (126 MHz,  $\text{CDCl}_3$ ) of compound **4s****

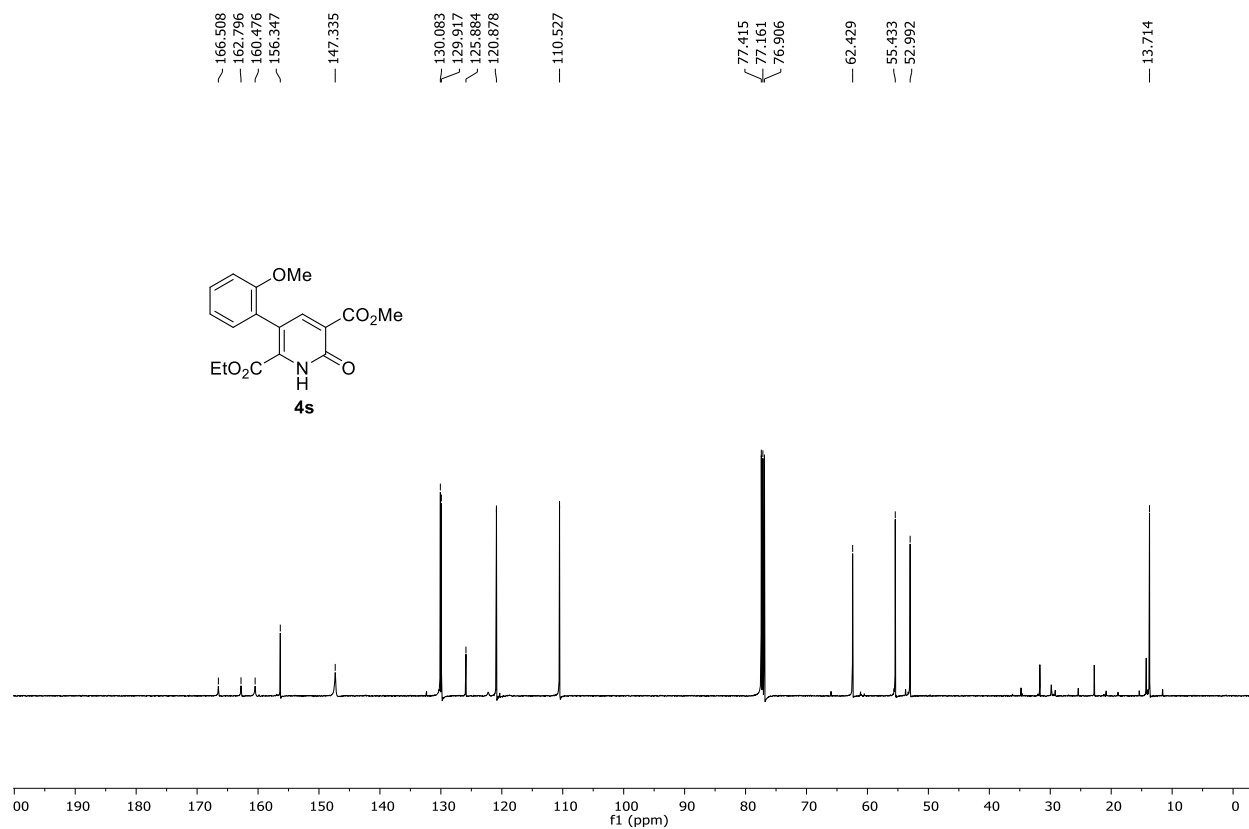

**<sup>1</sup>H-NMR (500 MHz, CDCl<sub>3</sub>) of compound 4t**

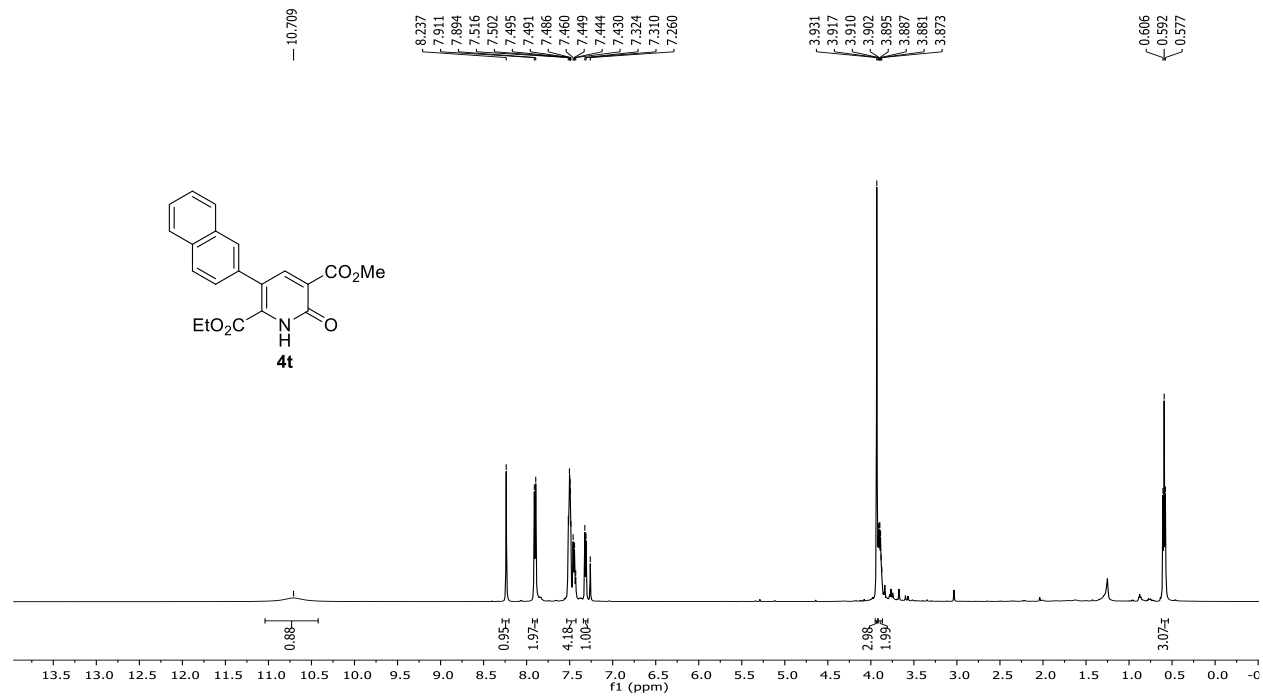

**<sup>13</sup>C-NMR (126 MHz, CDCl<sub>3</sub>) of compound 4t**

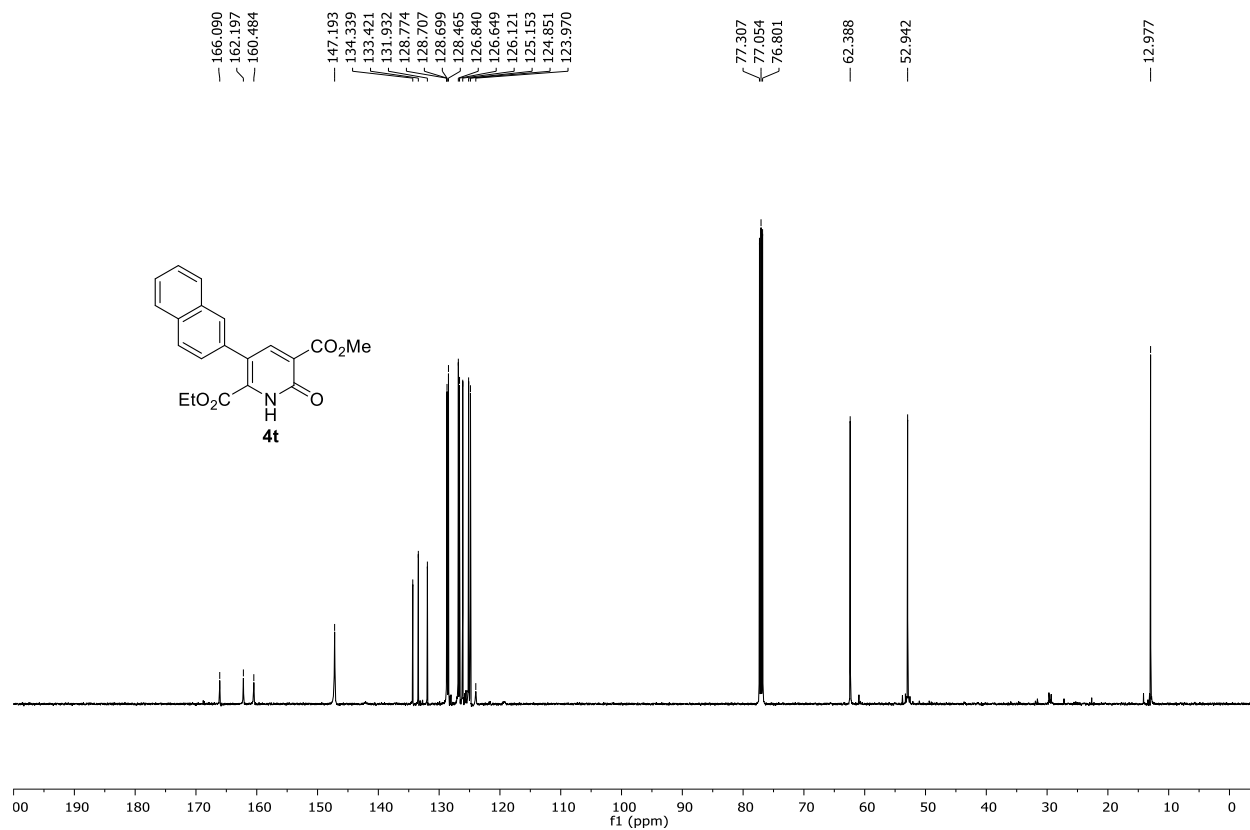

**$^1\text{H}$ -NMR (500 MHz,  $\text{CDCl}_3$ ) of compound **4u****

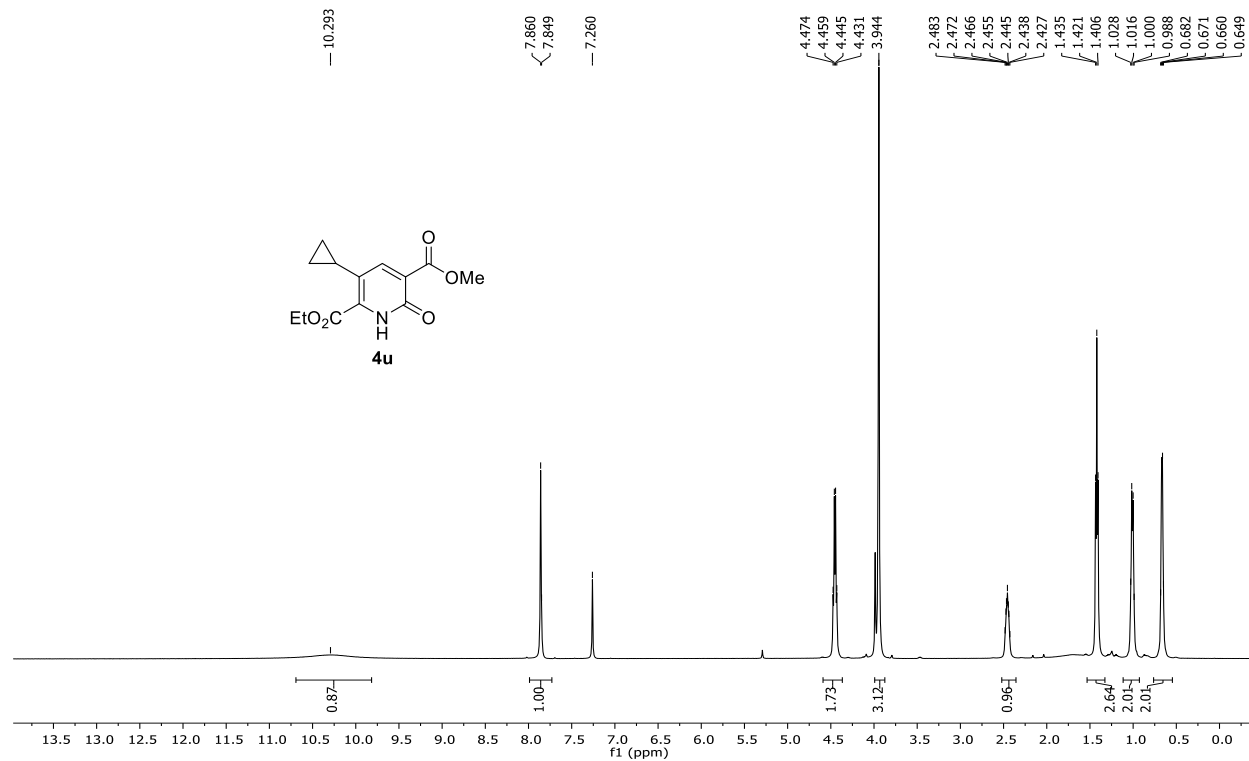

**$^{13}\text{C}$ -NMR (126 MHz,  $\text{CDCl}_3$ ) of compound **4u****

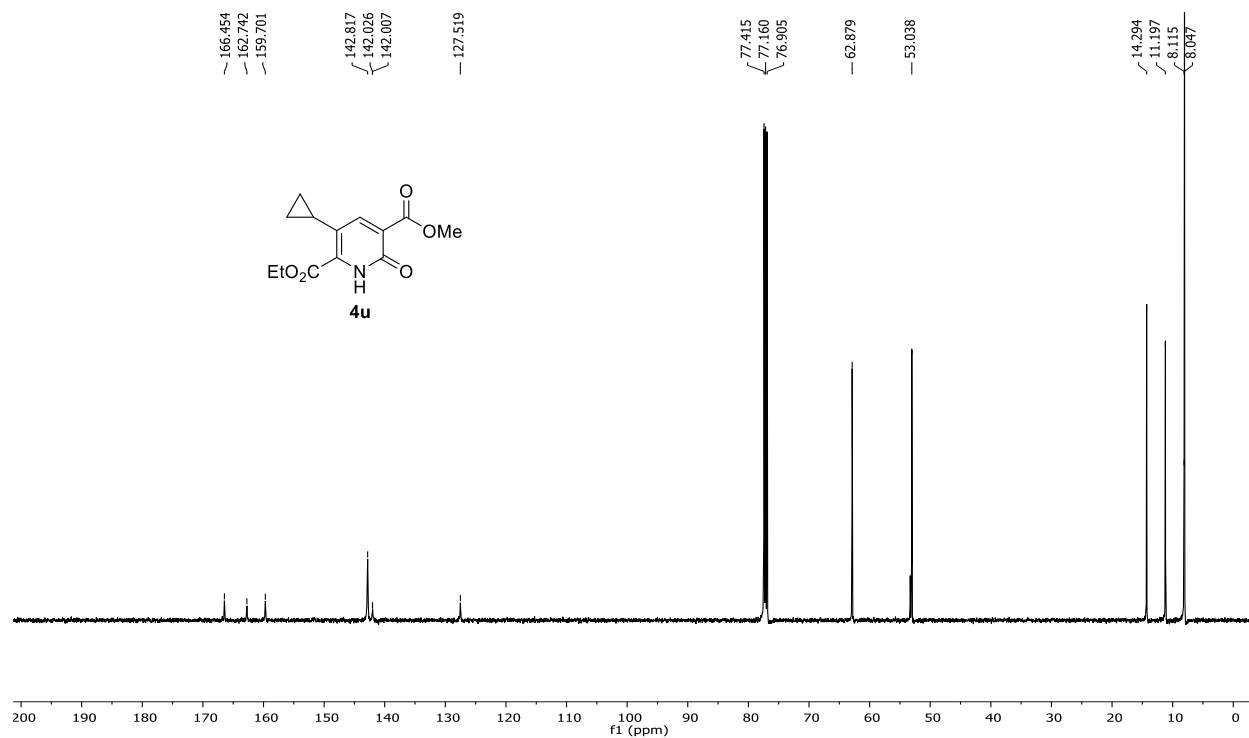

**$^1\text{H}$ -NMR (500 MHz,  $\text{CDCl}_3$ ) of compound 9a**

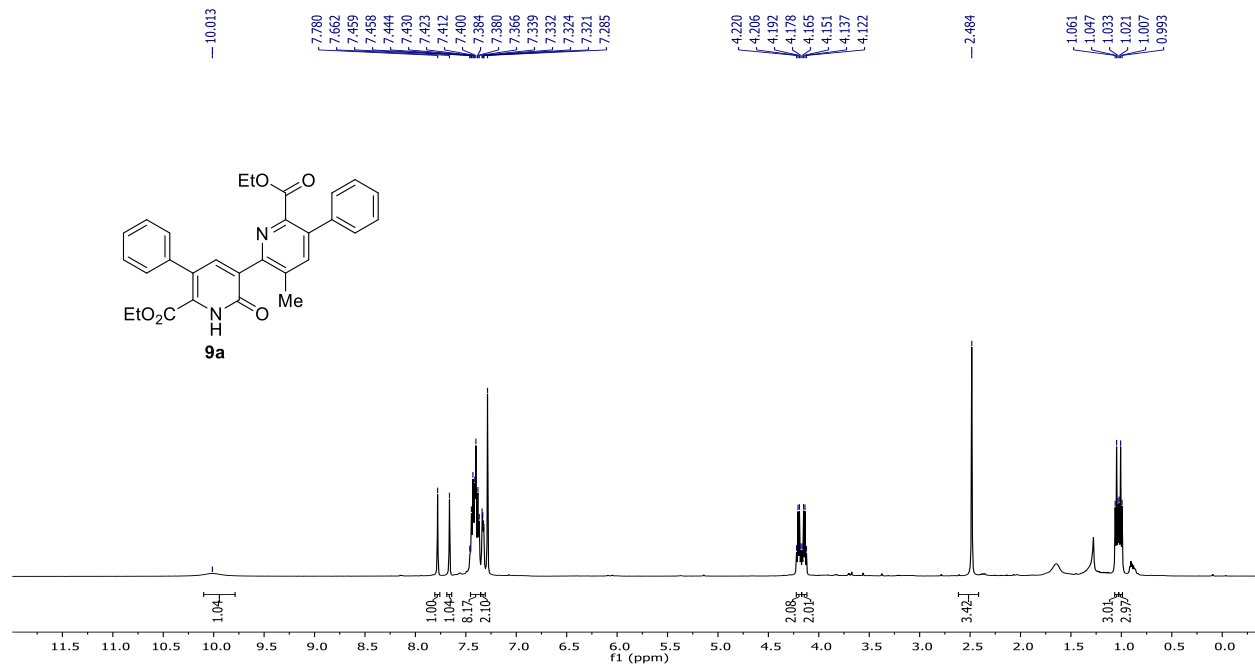

**$^{13}\text{C}$ -NMR (126 MHz,  $\text{CDCl}_3$ ) of compound 9a**

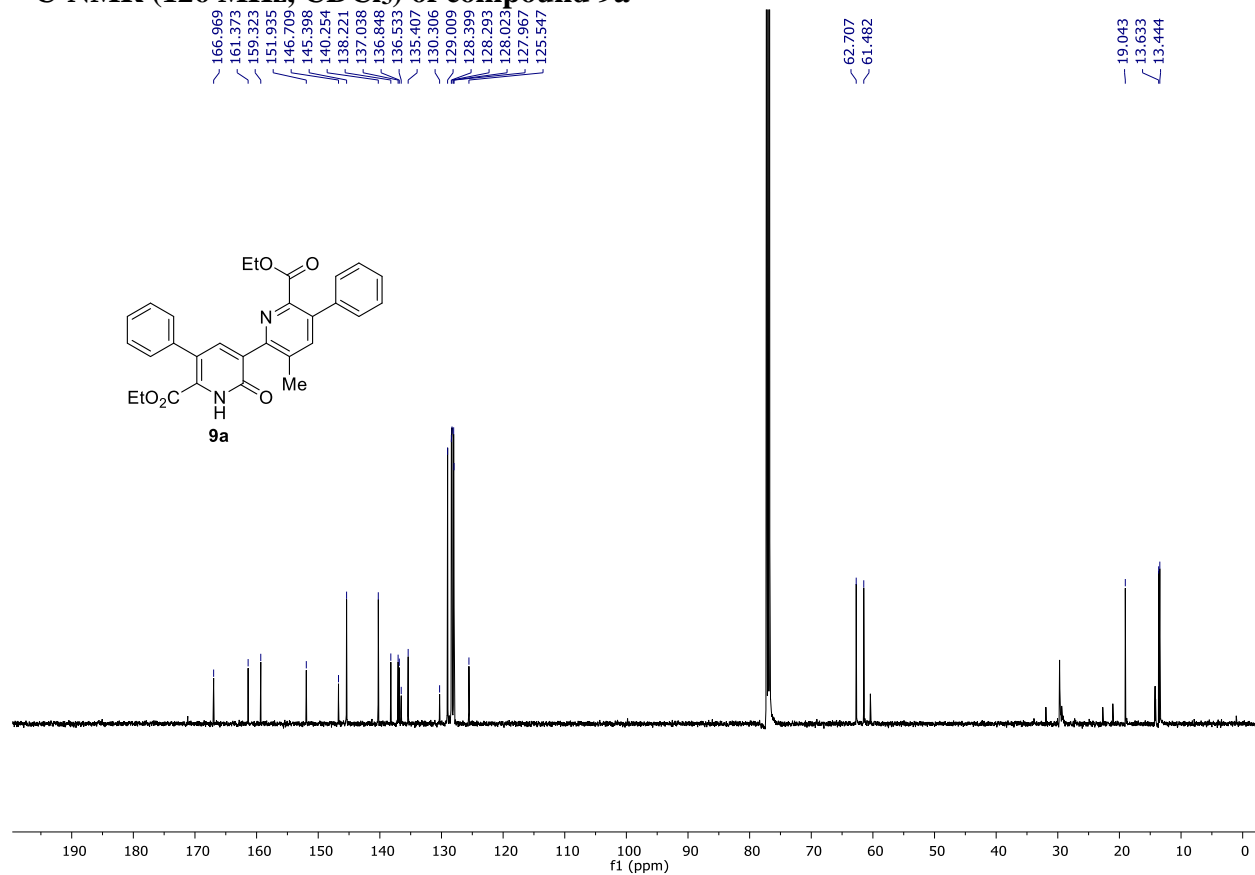

**$^1\text{H}$ -NMR (500 MHz,  $\text{CDCl}_3$ ) of compound 9b**

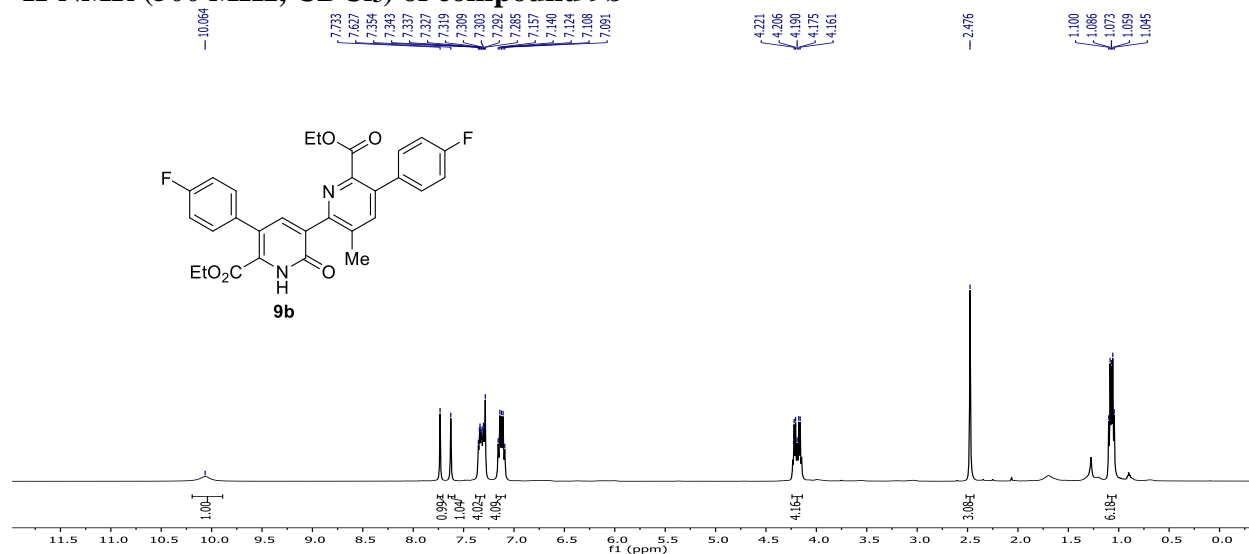

**$^{13}\text{C}$ -NMR (126 MHz,  $\text{CDCl}_3$ ) of compound 9b**

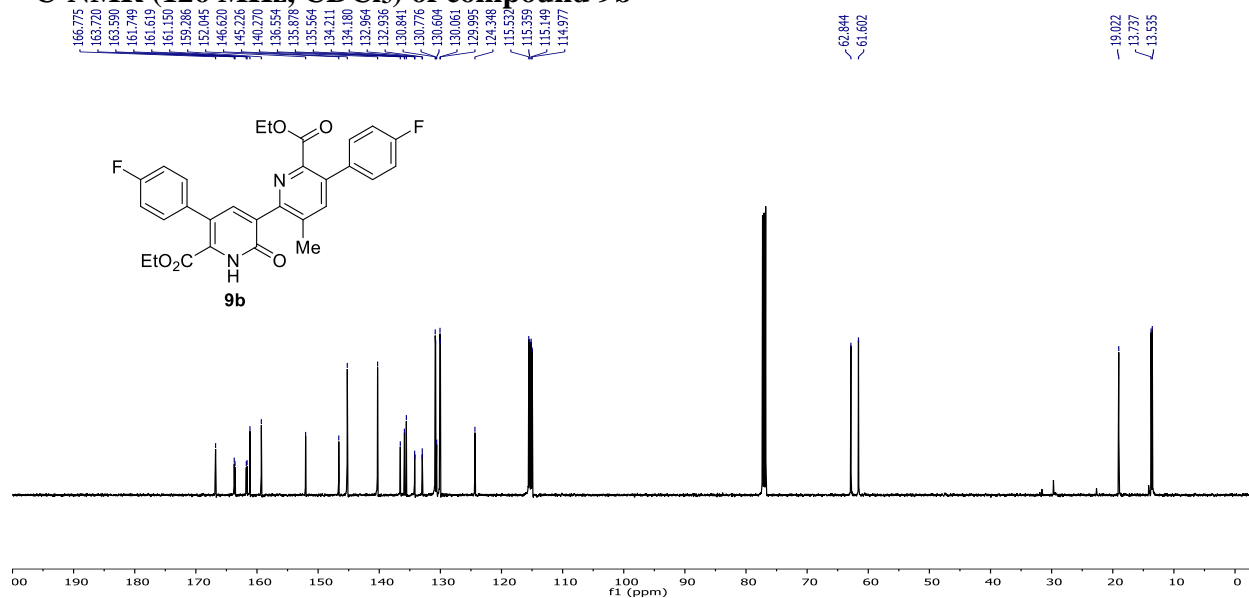

**$^{19}\text{F}$ -NMR (471 MHz,  $\text{CDCl}_3$ ) of compound 9b**

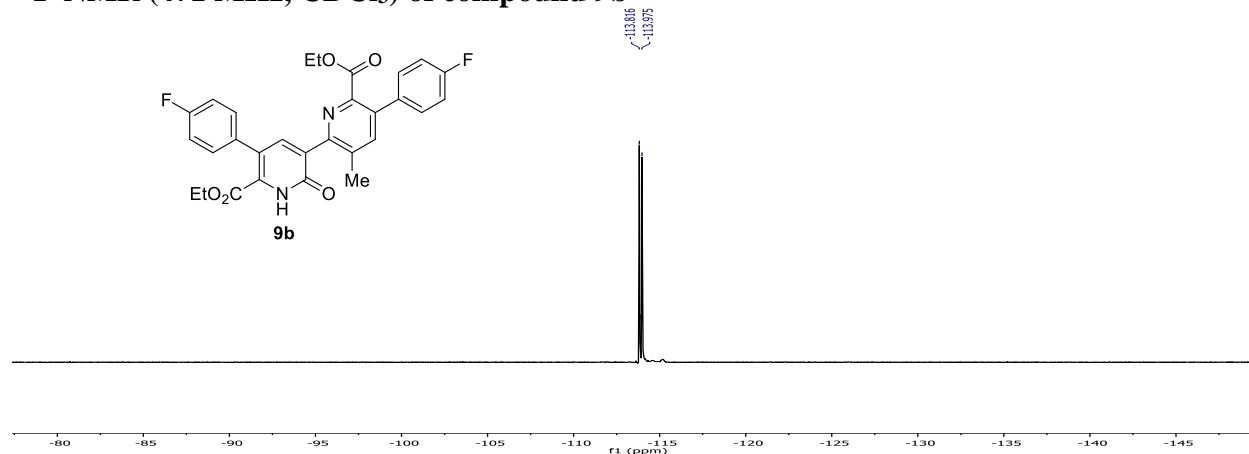

**$^1\text{H}$ -NMR (500 MHz,  $\text{CDCl}_3$ ) of compound 9c**

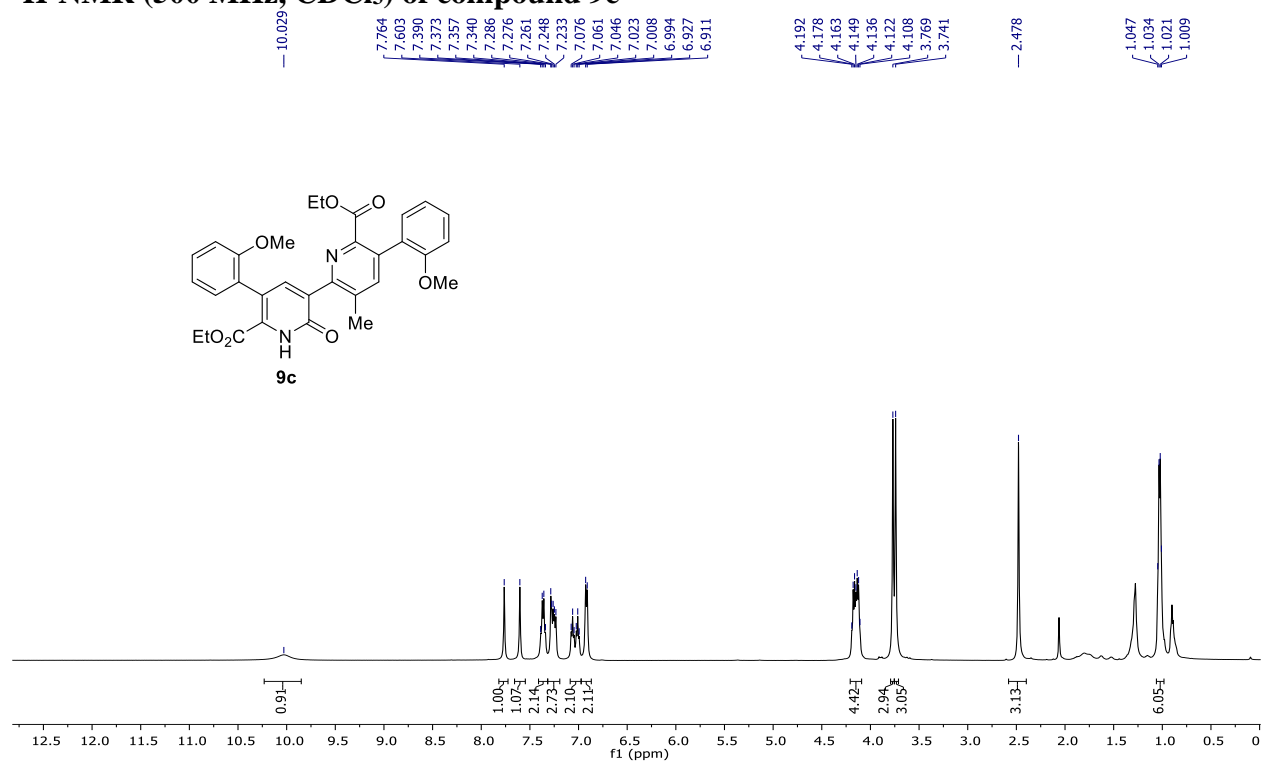

**$^{13}\text{C}$ -NMR (126 MHz,  $\text{CDCl}_3$ ) of compound 9c**

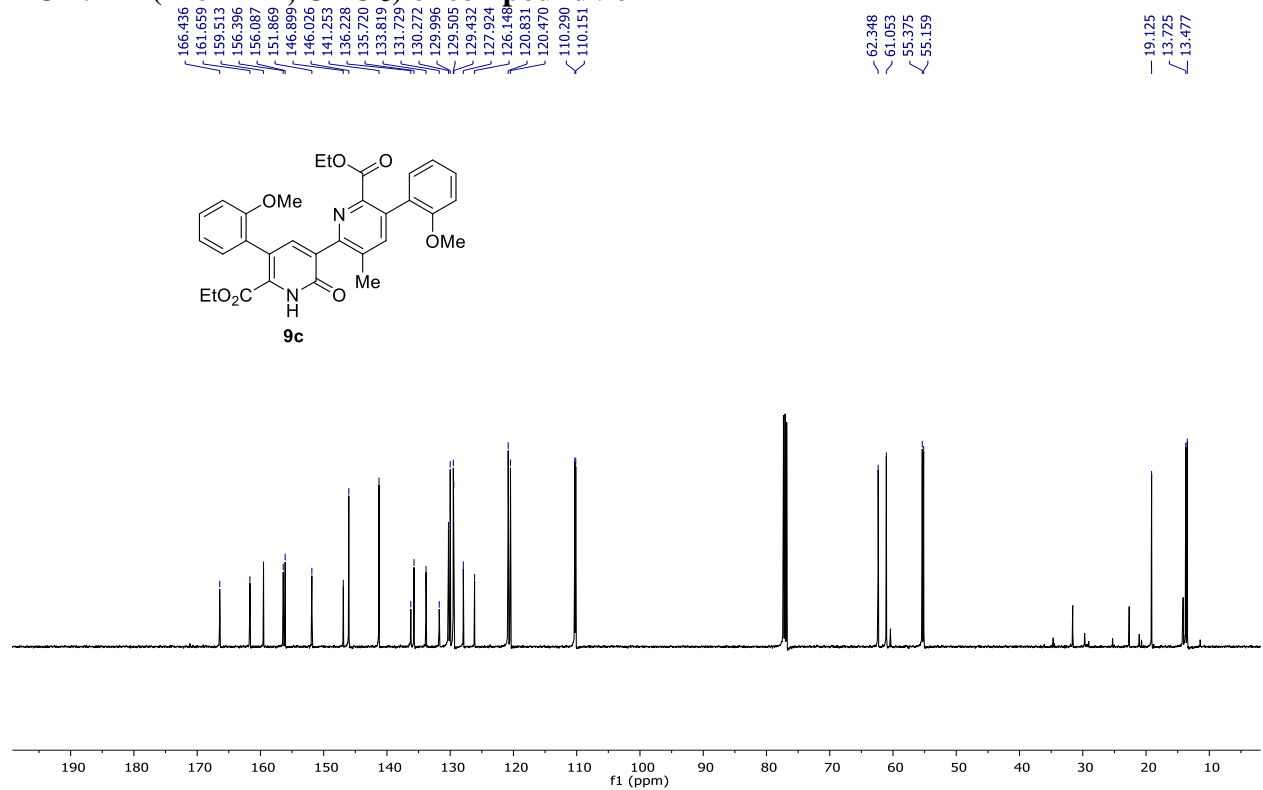



**$^1\text{H}$ -NMR (500 MHz,  $\text{CDCl}_3$ ) of compound 9d**

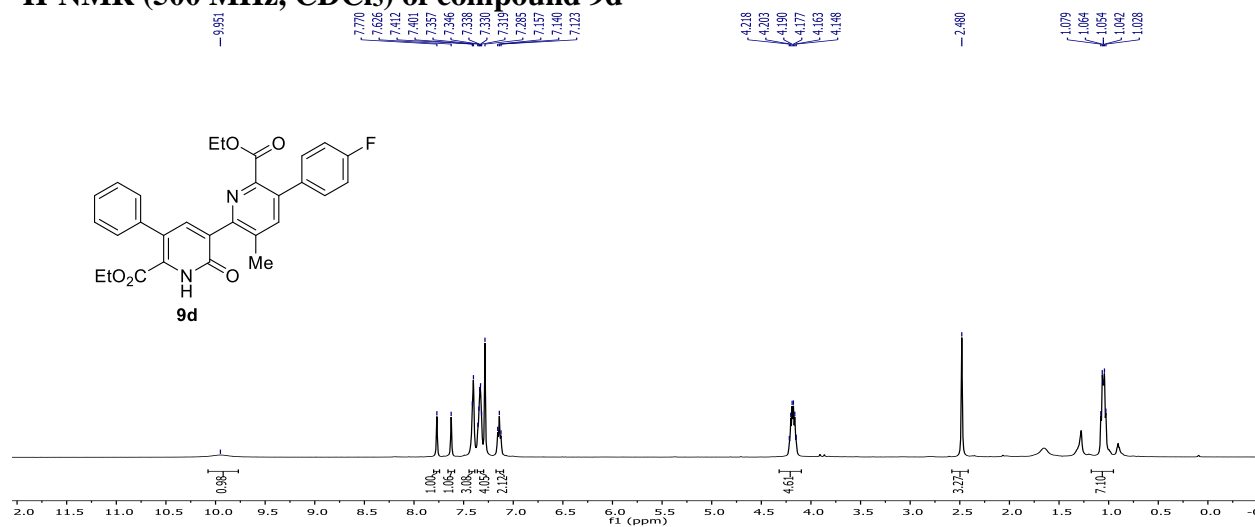

**$^{13}\text{C}$ -NMR (126 MHz,  $\text{CDCl}_3$ ) of compound 9d**

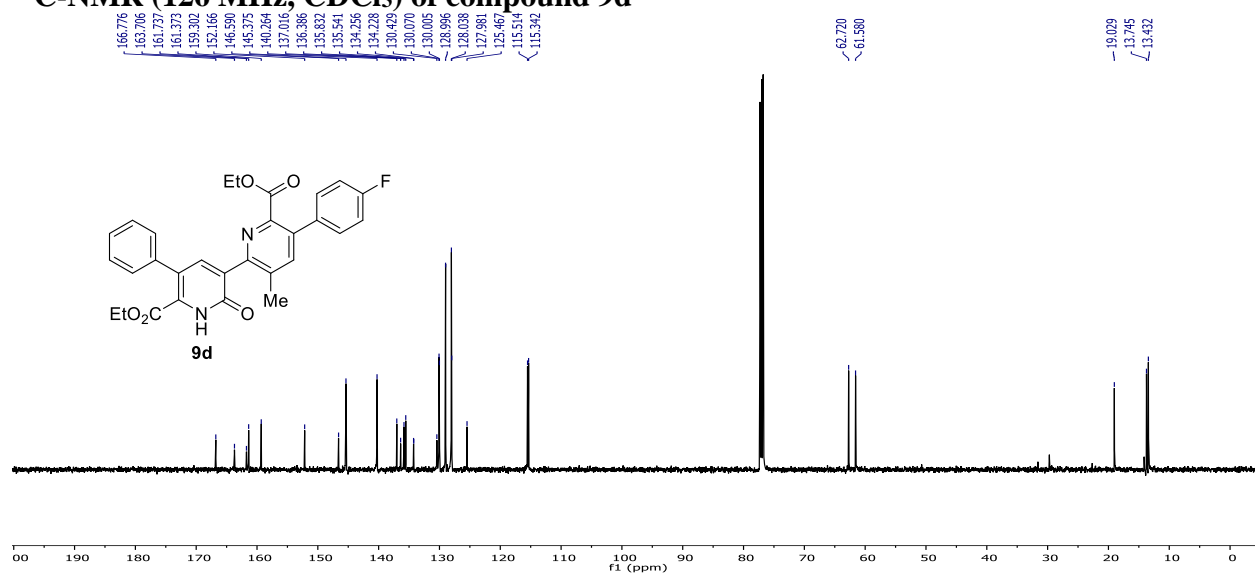

**$^{19}\text{F}$ -NMR (471 MHz,  $\text{CDCl}_3$ ) of compound 9d**

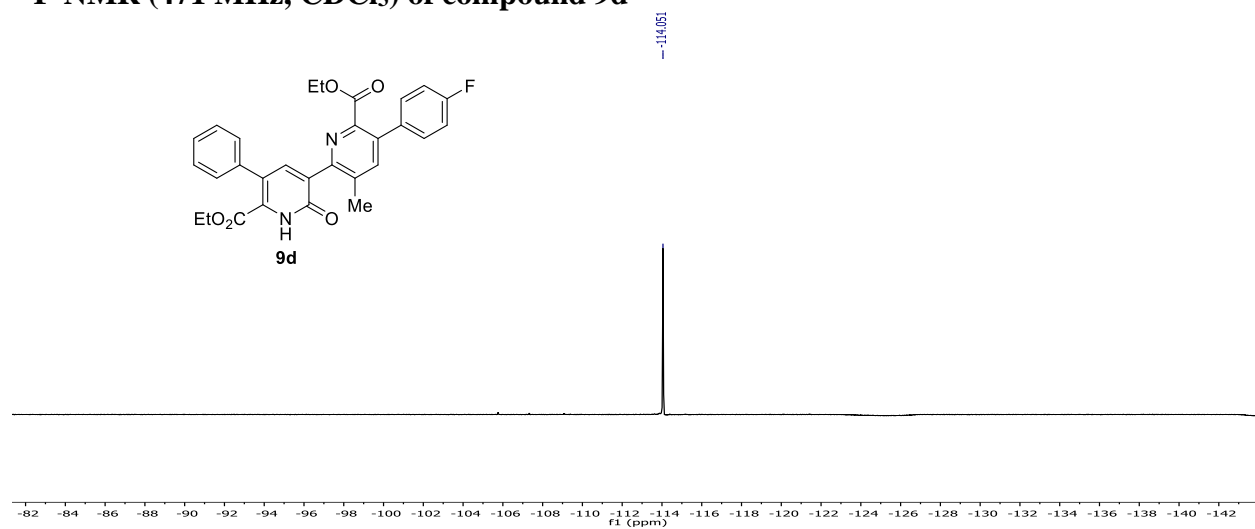

**$^1\text{H}$ -NMR (500 MHz,  $\text{CDCl}_3$ ) of compound 9e**

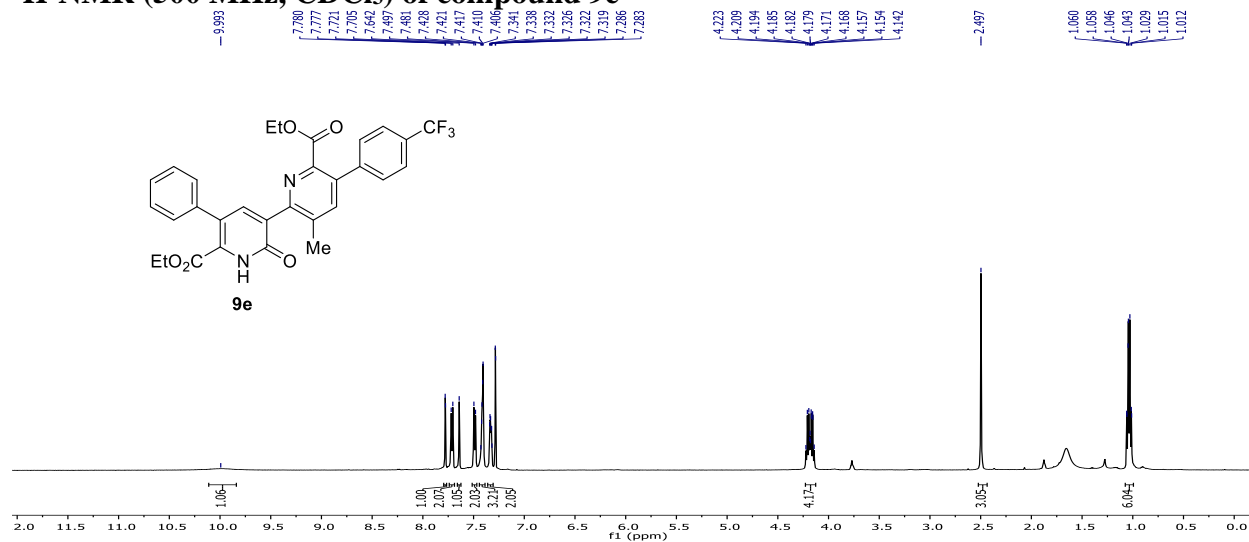

**$^{13}\text{C}$ -NMR (126 MHz,  $\text{CDCl}_3$ ) of compound 9e**

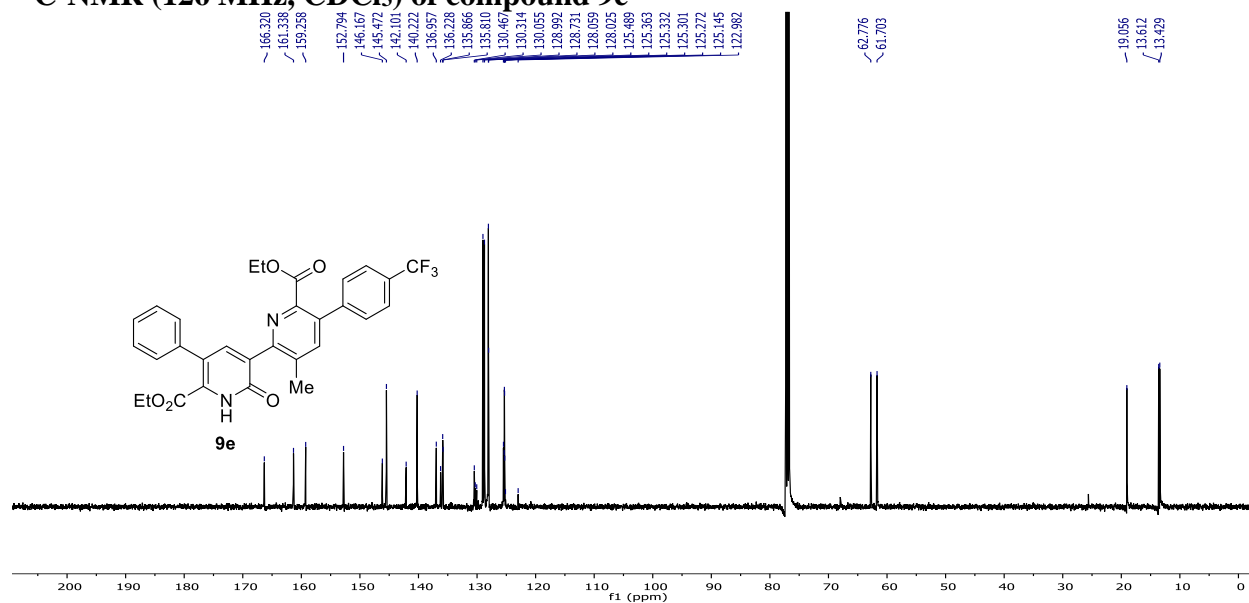

**$^{19}\text{F}$ -NMR (471 MHz,  $\text{CDCl}_3$ ) of compound 9e**

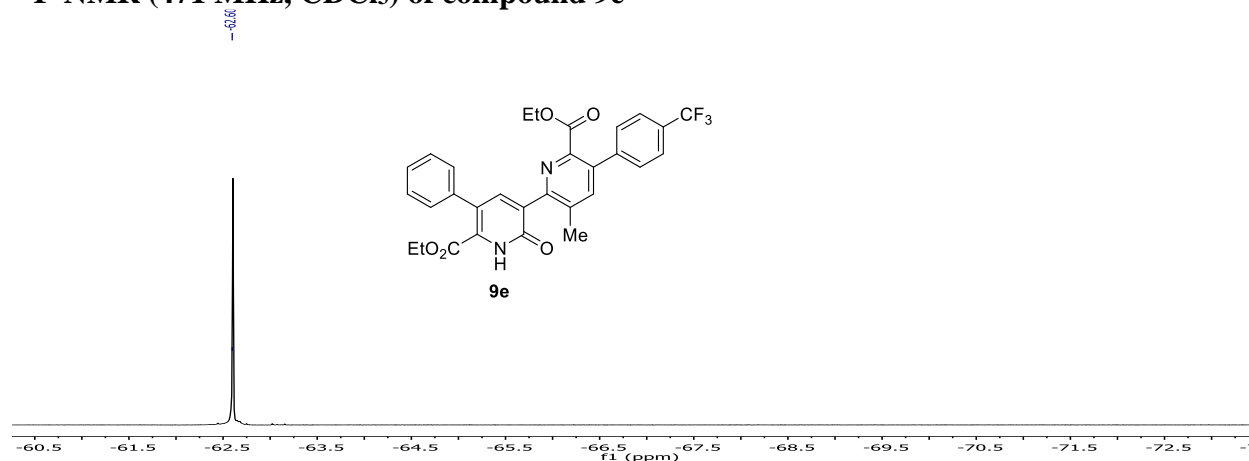

**<sup>1</sup>H-NMR (500 MHz, CDCl<sub>3</sub>) of compound 9f**

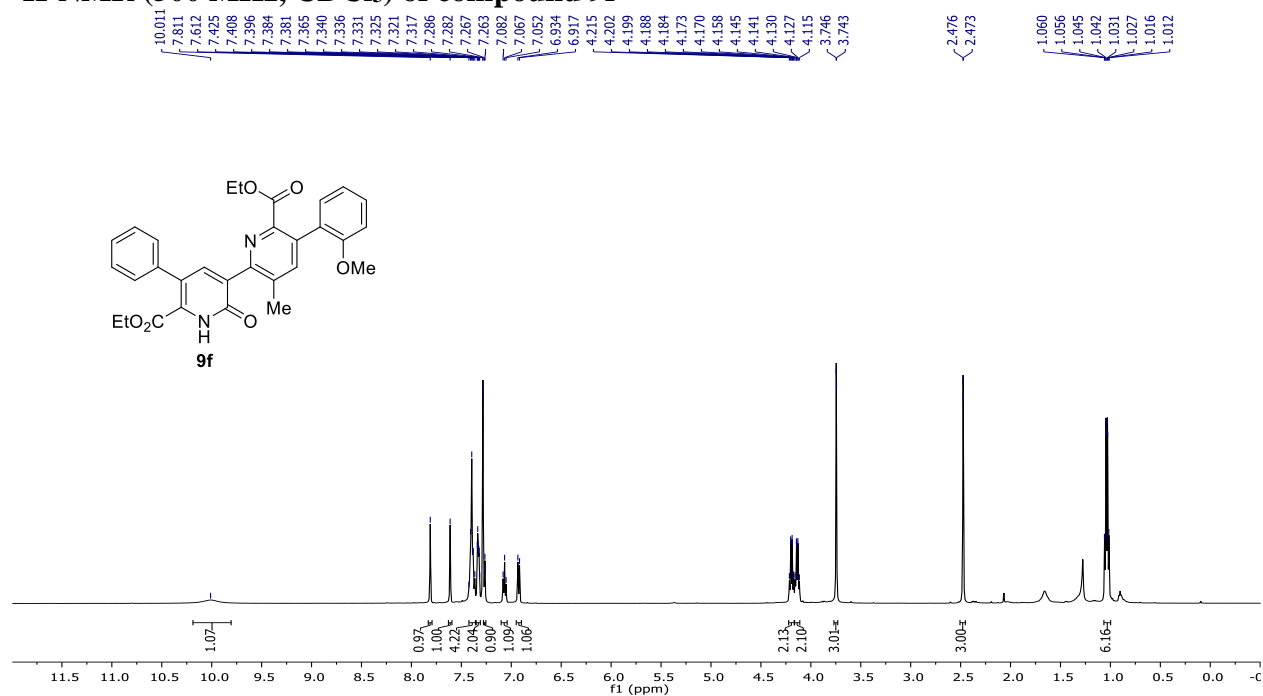

**<sup>13</sup>C-NMR (126 MHz, CDCl<sub>3</sub>) of compound 9f**

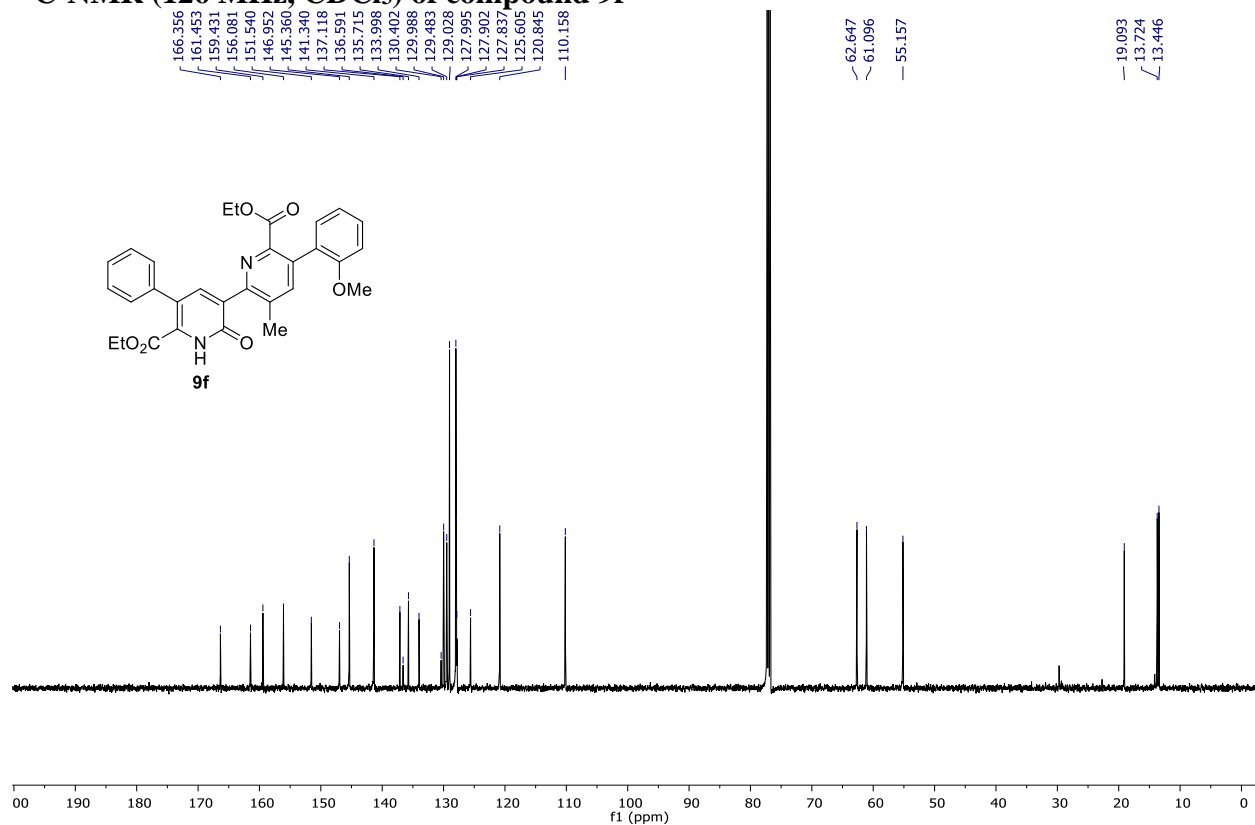

**$^1\text{H-NMR}$  (500 MHz,  $\text{CDCl}_3$ ) of compound **9g****

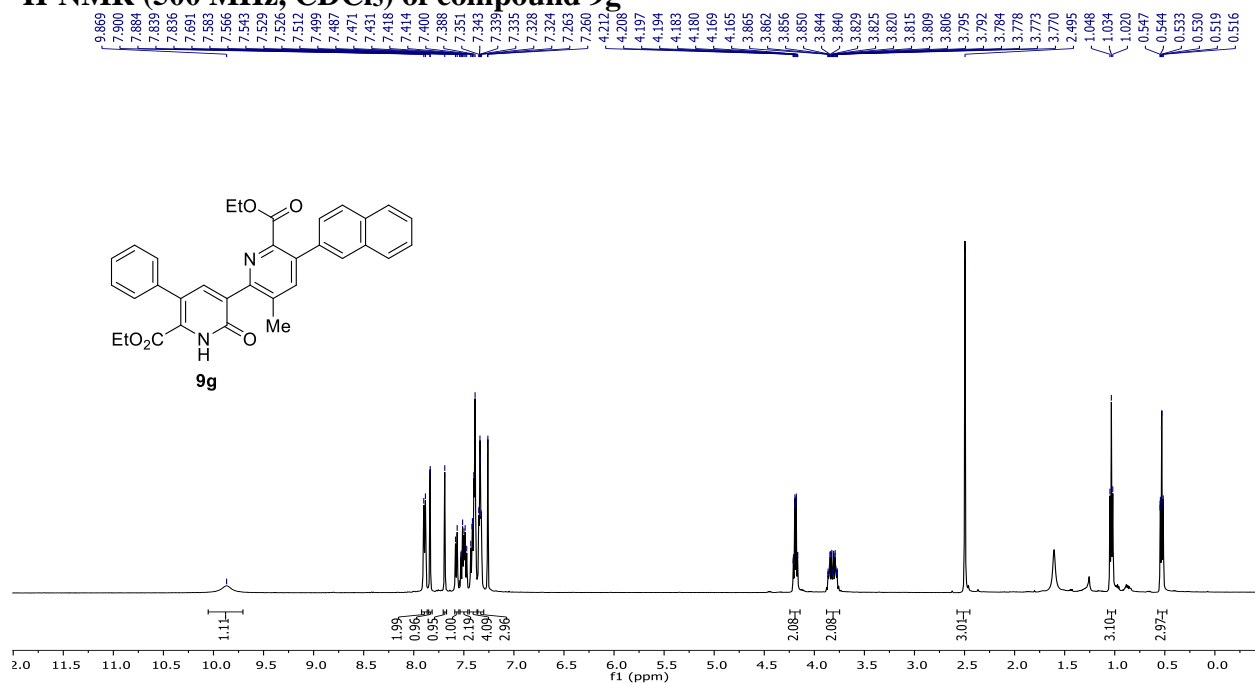

**$^{13}\text{C-NMR}$  (126 MHz,  $\text{CDCl}_3$ ) of compound **9g****

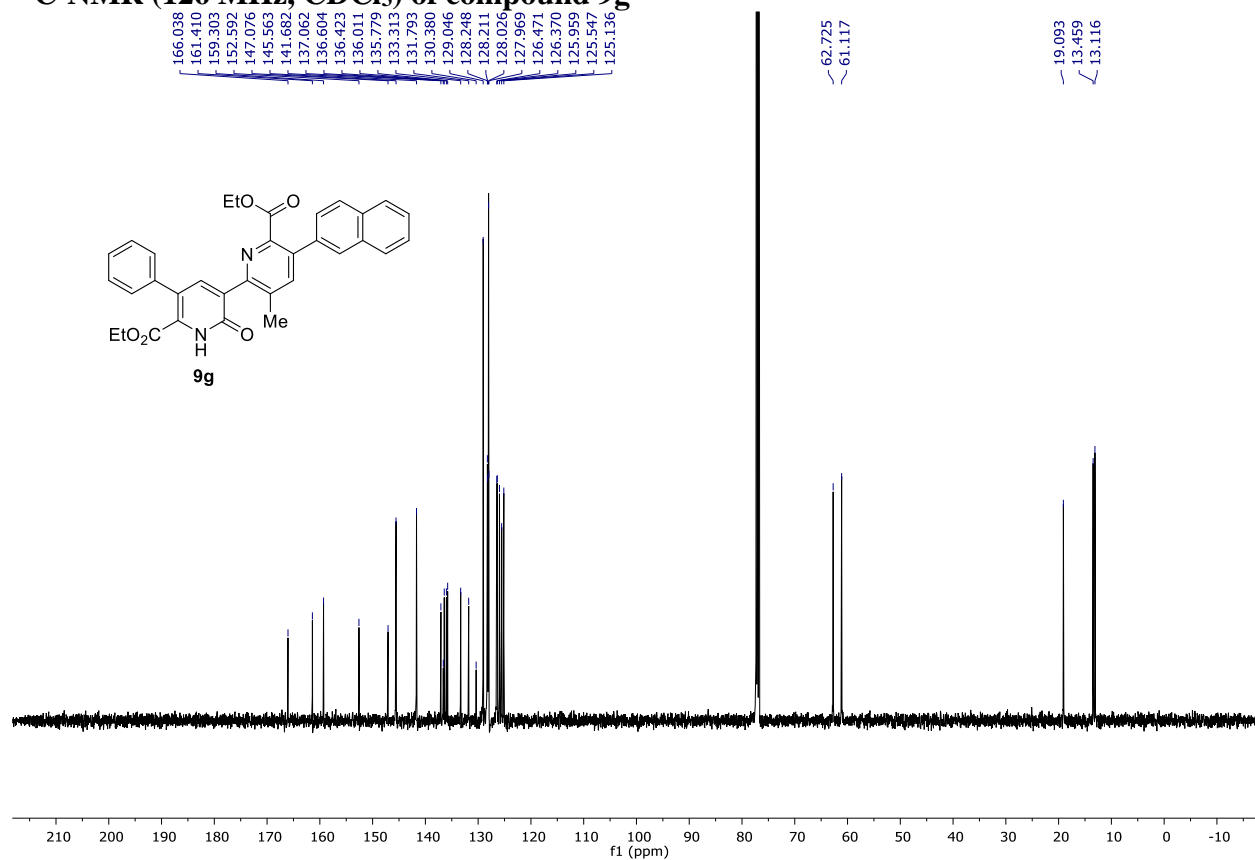

<sup>1</sup>H NMR (CDCl<sub>3</sub>) spectrum of compound **9h**. The chemical structure of **9h** is shown above the spectrum. The spectrum displays peaks in the aromatic region (7.283–9.858 ppm) and aliphatic region (0.996–3.286 ppm). Integration values are provided below the baseline.

| Chemical Shift (ppm) | Integration |
|----------------------|-------------|
| 9.858                | 1.07        |
| 7.283                | 1.00        |
| 7.380                | 0.98        |
| 7.332                | 8.10        |
| 7.316                | 2.10        |
| 4.154                | 2.15        |
| 4.151                | 2.09        |
| 2.836                | 2.09        |
| 1.064                | 3.32        |
| 1.050                | 3.08        |
| 1.036                | 3.09        |
| 1.024                |             |
| 1.010                |             |
| 0.996                |             |

**<sup>13</sup>C-NMR (126 MHz, CDCl<sub>3</sub>) of compound 9h**

CCOC(=O)c1c(C(=O)Nc2cc(C(=O)OCC)cc2-c3ccccc3)cc(C(=O)OCC)c4ccccc14

Chemical structure of compound 9h is shown above the spectrum. The spectrum displays peaks corresponding to the carbon atoms in the molecule, with the following chemical shifts (ppm) labeled above the peaks:

- 166.985, 161.344, 159.597, 151.559, 146.714, 145.291, 140.893, 138.417, 138.278, 137.060, 137.023, 136.754, 136.727, 130.126, 128.999, 128.412, 128.327, 128.023, 127.974, 125.539
- 62.705, 61.484
- 25.136
- 14.133, 13.632, 13.445

The x-axis is labeled f1 (ppm) and ranges from 200 to 0.

**$^1\text{H}$ -NMR (500 MHz,  $\text{CDCl}_3$ ) of compound 9i**

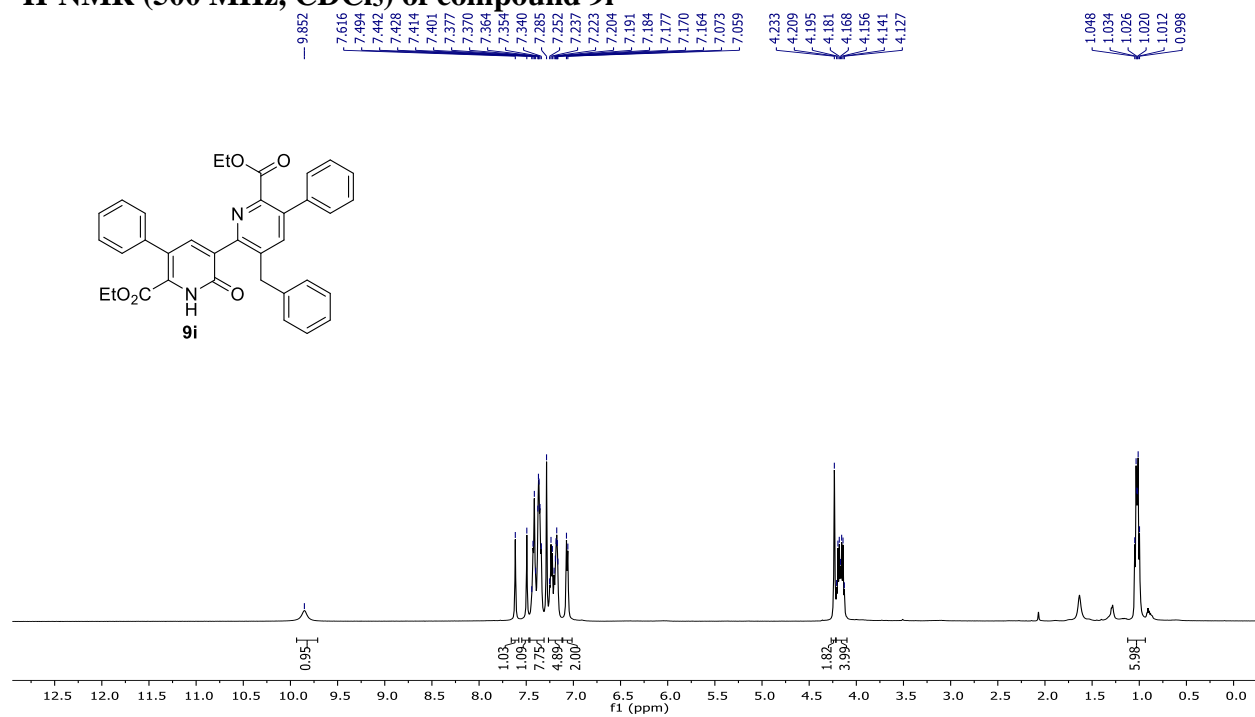

**$^{13}\text{C}$ -NMR (126 MHz,  $\text{CDCl}_3$ ) of compound 9i**

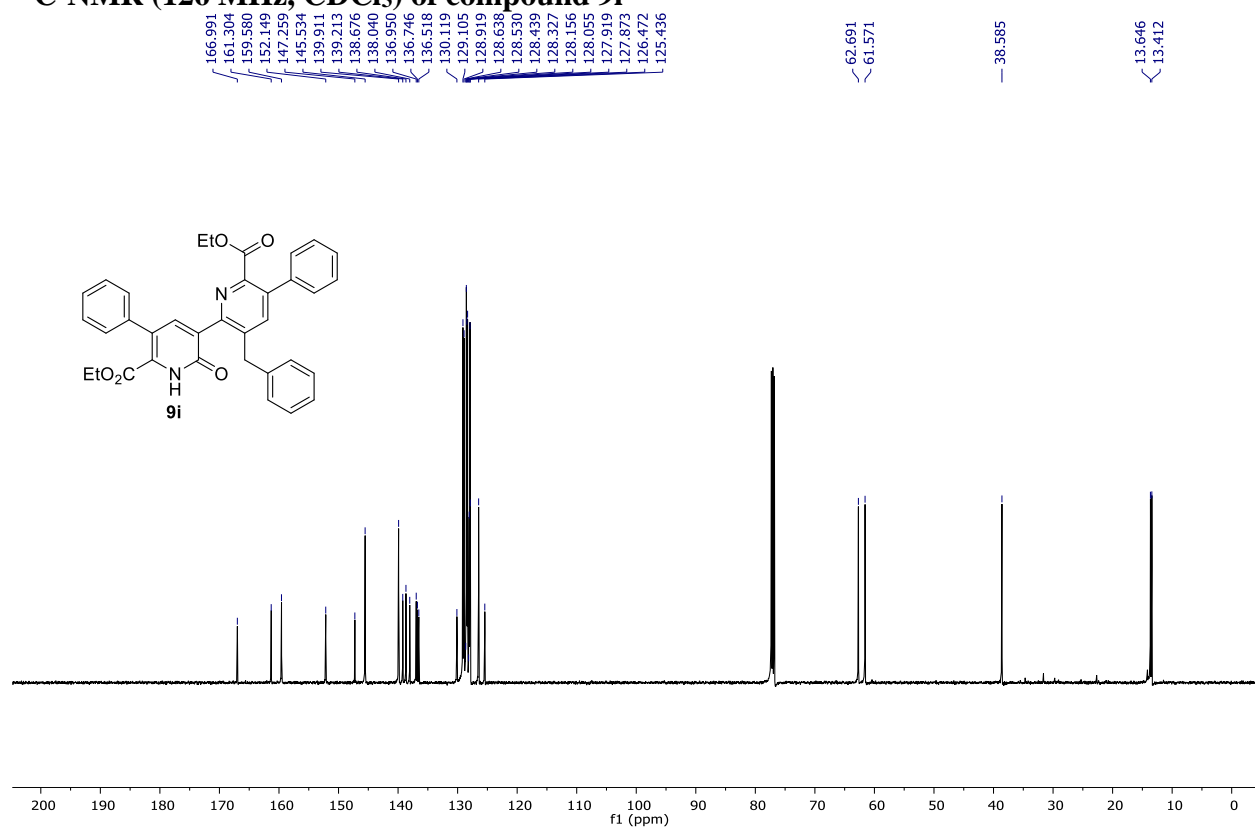

## 10. References

1. (a) A. Padwa, Y. S. Kulkarni and Z. J. Zhang, *J. Org. Chem.* 1990, **55**, 4144–4153; (b) H. M. L. Davis, P. W. Hougland and W. R. Cantrell Jr., *Synth Commun.* 1992, **22**, 971–978; (c) H. M. L. Davies, B. H. Hu, E. Saikali and P. R. Bruzinski, *J. Org. Chem.* 1994, **59**, 4535–4541; (d) M. P. Doyle, M. Yan and W. H. Hu, *J. Am. Chem. Soc.* 2003, **125**, 4692–4693; (e) V. V. Pagar, A. M. Jadhav and R. S. Liu, *J. Am. Chem. Soc.* 2011, **133**, 20728–2073; (f) H. F. Zheng, K. Y. Dong, D. Whertritt, H. Arman and M. P. Doyle, *Angew. Chem. Int. Ed.* **2020**, **59**, 13613–13617.
2. L. De Angelis, H. Zheng, M.T. Perz, H. Arman and M.P. Doyle, *Org. Lett.* 2021, **23**, 6542–6546.
3. CrysAlisPro 1.171.40.63a (Rigaku Oxford Diffraction, 2019).
4. SCALE3 ABSPACK - An Oxford Diffraction program (1.0.4,gui:1.0.3) (C) 2005 Oxford Diffraction Ltd.
5. O. V. Dolomanov, L. J. Bourhis, R. J. Gildea, J. A. K. Howard and H. Puschmann, *J. Appl. Cryst.* 2009, **42**, 339.
6. G. M. Sheldrick, *Acta Cryst.* 2015, **A71**, 3.
7. G. M. Sheldrick, *Acta Cryst.* 2008, **A64**, 112.
8. Gaussian 16, Revision A.03, M. J. Frisch, G. W. Trucks, H. B. Schlegel, G. E. Scuseria, M. A. Robb, J. R. Cheeseman, G. Scalmani, V. Barone, G. A. Petersson, H. Nakatsuji, X. Li, M. Caricato, A. V. Marenich, J. Bloino, B. G. Janesko, R. Gomperts, B. Mennucci, H. P. Hratchian, J. V. Ortiz, A. F. Izmaylov, J. L. Sonnenberg, D. Williams-Young, F. Ding, F. Lipparini, F. Egidi, J. Goings, B. Peng, A. Petrone, T. Henderson, D. Ranasinghe, V. G. Zakrzewski, J. Gao, N. Rega, G. Zheng, W. Liang, M. Hada, M. Ehara, K. Toyota, R. Fukuda, J. Hasegawa, M. Ishida, T. Nakajima, Y. Honda, O. Kitao, H. Nakai, T. Vreven, K. Throssell, J. A. Montgomery, Jr., J. E. Peralta, F. Ogliaro, M. J. Bearpark, J. J. Heyd, E. N. Brothers, K. N. Kudin, V. N. Staroverov, T. A. Keith, R. Kobayashi, J. Normand, K. Raghavachari, A. P. Rendell, J. C. Burant, S. S. Iyengar, J. Tomasi, M. Cossi, J. M. Millam, M. Klene, C. Adamo, R. Cammi, J. W. Ochterski, R. L. Martin, K. Morokuma, O. Farkas, J. B. Foresman and D. J. Fox, Gaussian, Inc., Wallingford CT, 2016.
9. S. Grimme, C. Bannwarth and P. Shushkov, *J Chem. Theory Comput.* 2017, **13**, 1989–2009.
10. CYLview, 1.0b, C. Y. Legault, Université de Sherbrooke, 2009 (<http://www.cylview.org>).
11. W. Humphrey, A. Dalke and K. Schulten, *J. Mol. Graph.* 1996, **14**, 33–38.
12. Chemcraft - graphical software for visualization of quantum chemistry computations. <https://www.chemcraftprog.com>
13. G. Luchini, J. V. Alegre-Requena, Y. Guan, I. Funes-Ardoiz and R. S. Paton, GoodVibes: GoodVibes v3.0.1 (2019).
14. <https://www.basissetexchange.org/>

15. S. Jin, G. C. Haug, R. Trevino, V. D. Nguyen, H. D. Arman and O. V. Larionov, *Chem. Sci.* 2021, **12**, 13914–13921.
16. F. M. Bickelhaupt and K. N. Houk, *Angew. Chem. Int. Ed.* 2017, **56**, 10070–10086.
- [17] I. Fernández, F. M. Bickelhaupt, F. P. Cossío, *Chem. Eur. J.* **2014**, *20*, 10791–10801.
